# Supplementary material for: Catalyst- and oxidant-free electrooxidative site-selective [3/4 + 2] annulation to fused polycyclic heteroaromatics
Source: Royal Society of Chemistry journal article supplement (doi:10.1039/d2gc01248k), 2022-01-01

## Catalyst- and oxidant-free electrooxidative site-selective [3/4+2] annulation to fused polycyclic heteroaromatics

Wenjing Guan<sup>1</sup>, Ke Ying<sup>1</sup>, Chengcheng Yuan<sup>1</sup>, Jinlin Hang<sup>1</sup>, Chengkou Liu<sup>1</sup>,

Xiangxing Huang<sup>1</sup>, Zheng Fang<sup>1</sup> & Kai Guo<sup>1,2\*</sup>

<sup>1</sup>College of Biotechnology and Pharmaceutical Engineering, Nanjing Tech University,  
Nanjing, 211816, China. E-mail: guok@njtech.edu.cn.

<sup>2</sup>State Key Laboratory of Materials-Oriented Chemical Engineering, Nanjing Tech  
University, Nanjing, 211816, China.

### Table of Contents

|    | Contents                                             | Page    |
|----|------------------------------------------------------|---------|
| 1  | General Information                                  | S2      |
| 2  | General Material Information for Electrolysis Setup  | S2      |
| 3  | General Procedure for the Electrochemical Annulation | S3      |
| 4  | Gram-Scale Synthesis of <b>3</b>                     | S3-S4   |
| 5  | Mechanistic Studies                                  | S4-S7   |
| 6  | X-ray Crystallography Studies of Product <b>23</b>   | S7-S8   |
| 7  | Synthesis of Substrates                              | S8-S10  |
| 8  | Characterization Data for Electrolysis Products      | S10-S33 |
| 9  | References                                           | S34     |
| 10 | NMR Spectra for Electrolysis Products and <b>50</b>  | S35-S85 |

## 1、 General Information

Commercially available reagents and solvents are of reagent grade quality without further purification. Flash column chromatography is performed using silicycle silica gel (200-300 mesh). Analytical thin-layer chromatography (TLC) is performed on 0.2 mm coated silica gel plates (HSGF 254) and visualized using a UV lamp (254 nm).  $^1\text{H}$  NMR and  $^{13}\text{C}$  NMR are recorded on magnet system 400'54 ascend purchased from Bruker Biospin AG. HRMS (ESI) spectra are recorded on Agilent Q-TOF 6520.

Electrochemical oxidative [3+2] or [4+2] annulation was carried out in an undivided cell equipped with a carbon cloth anode and a platinum plate cathode under the open air. The carbon cloth, graphite rod ( $\varnothing$  6 mm) and platinum plate were purchased from Shanghai Jing Chong Electronic Technology Development Co., Ltd. Reticulated vitreous carbon (RVC) was purchased from Gaoss Union (Tianjin) Photoelectric Technology Co., Ltd. And, electrolysis was conducted under an AXIOMET AX3003P potentiostat in constant current mode. Cyclic voltammogram experiments were investigated using a Metrohm Autolab PGSTAT204 workstation and Nova 2.0 software.

## 2、 General Material Information for Electrolysis setup

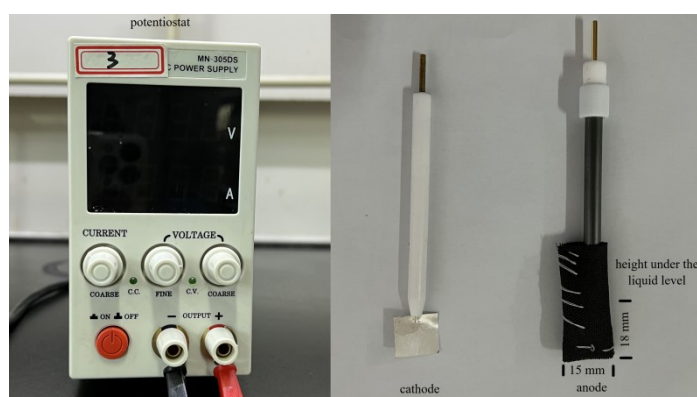

**Figure S1** Picture of DIY electrolysis setup

The DIY electrolysis setup used is shown in Fig. S1.

### 3、 General Procedure for the Electrochemical Annulationkynes

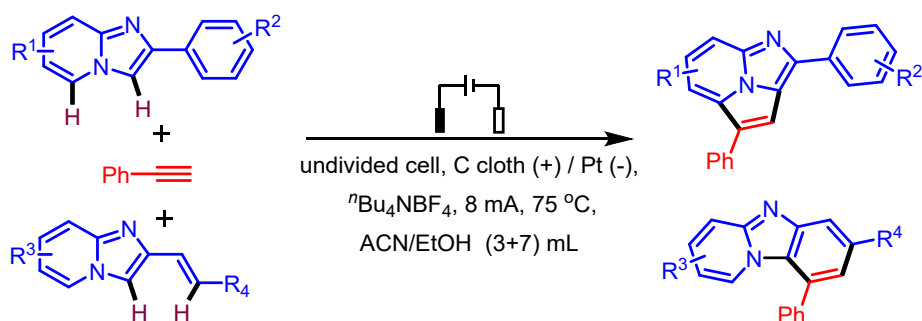

In an undivided cell equipped with a carbon cloth (35 mm x 15 mm) anode and a Pt (10 mm x 10 mm x 0.1 mm) cathode, imidazo[1,2-*a*]pyridine (0.2 mmol), ethynylbenzene (1.2 mmol), <sup>t</sup>Bu<sub>4</sub>NBF<sub>4</sub> (0.2 mmol, 65.8 mg) were dissolved in 3 mL ACN and 7 mL EtOH. The mixture above was stirred and electrolyzed at a constant current of 8 mA for 1.5-2 h under the open air. The reaction solution was diluted with ethyl acetate (50 mL) and washed with H<sub>2</sub>O (50 mL). The separated organic layer was dried over anhydrous Na<sub>2</sub>SO<sub>4</sub> and filtered. The filtrate was concentrated under reduced pressure to give the crude product, which was purified by column chromatographic separation (petroleum ether/ethyl acetate: 250/1 to 5/1) to obtain the desired product.

### 4、 Gram-Scale Synthesis of 3

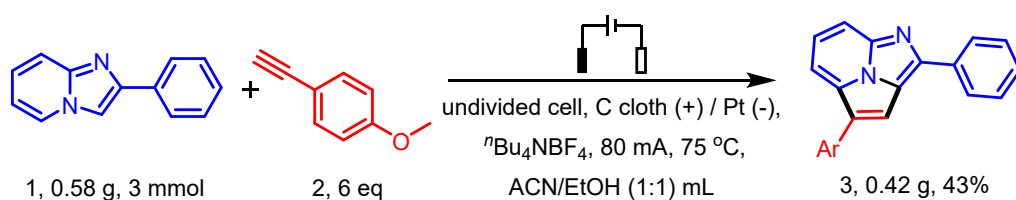

The imidazo[1,2-*a*]pyridine **1** (3 mmol, 0.58 g), <sup>t</sup>Bu<sub>4</sub>NBF<sub>4</sub> (2 mmol, 0.658 g), 1-ethynyl-4-methoxybenzene **2** (18 mmol, 2.38 g), ACN (50 mL) and EtOH (50 mL) was added in a 150 mL beaker, which was equipped with a stir bar, a carbon cloth (100 mm × 50 mm) anode and a platinum plate (20 mm × 20 mm × 0.1 mm) cathode. The solution was stirred and electrolyzed at a constant current of 80 mA for 4 h under the open air. The reaction solution was diluted with ethyl acetate (200 mL) and washed with brine (200 mL) and H<sub>2</sub>O (200 mL). The separated organic

layer was dried over anhydrous  $\text{Na}_2\text{SO}_4$  and filtered. The filtrate was concentrated under reduced pressure to give the crude product, which was purified by column chromatographic separation (petroleum ether/ethyl acetate = 20/1, 0.42 g, 43%).

## 5、Mechanistic Studies

### 5-1、Radical-trapping experiments

#### 5-1-1、TEMPO was added

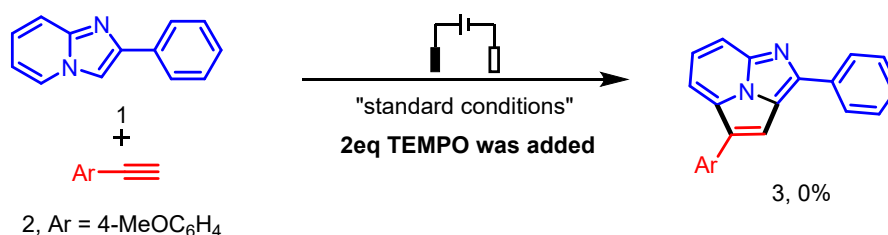

In an undivided cell equipped with a carbon cloth (35 mm x 15 mm) anode and a Pt (10 mm x 10 mm x 0.1 mm) cathode, 2-phenylimidazo[1,2-*a*]pyridine **1** (0.2 mmol, 38.9 mg), 1-ethynyl-4-methoxybenzene **2** (1.2 mmol, 158.6 mg),  $\text{tBu}_4\text{NBF}_4$  (0.2 mmol, 65.8 mg) and TEMPO (0.4 mmol, 62.5 mg) were dissolved in 3 mL ACN and 7 mL EtOH. The mixture above was stirred and electrolyzed at a constant current of 8 mA for 1.5 h under the open air. No desired product was detected.

#### 5-1-2、BHT was added

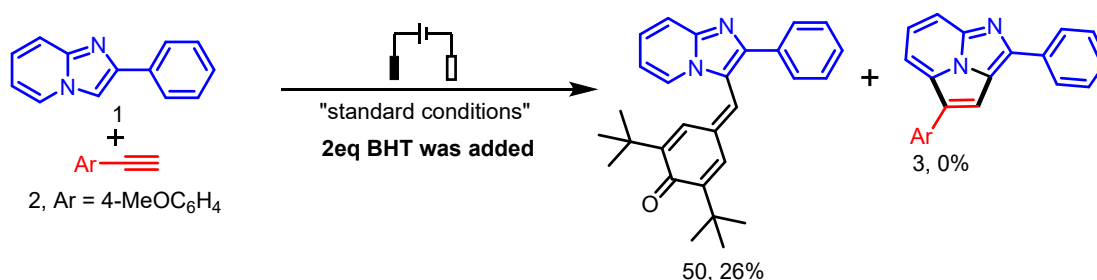

In an undivided cell equipped with a carbon cloth (35 mm x 15 mm) anode and a Pt (10 mm x 10 mm x 0.1 mm) cathode, 2-phenylimidazo[1,2-*a*]pyridine **1** (0.2 mmol, 38.9 mg), 1-ethynyl-4-methoxybenzene **2** (1.2 mmol, 158.6 mg),  $\text{tBu}_4\text{NBF}_4$  (0.2 mmol, 65.8 mg) and BHT (0.4 mmol, 88.2 mg) were dissolved in 3 mL ACN and 7 mL EtOH. The mixture above was stirred and electrolyzed at a constant current of 8



mA for 2.5 h under the open air. No desired product was detected. Moreover, the corresponding radical trapping product **50** was generated.

The reaction solution was diluted with ethyl acetate (50 mL) and washed with brine (50 mL) and H<sub>2</sub>O (50 mL). The separated organic layer was dried over anhydrous Na<sub>2</sub>SO<sub>4</sub> and filtered. The filtrate was concentrated under reduced pressure to give the crude product, which was purified by column chromatographic separation (petroleum ether/ethyl acetate = 5/1) to obtain the radical trapping product **50** (21.4 mg, 26%).

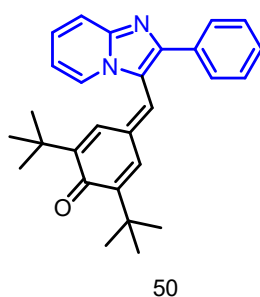

2,6-di-*tert*-butyl-4-((2-phenylimidazo[1,2-*a*]pyridin-3-yl)methylene)cyclohexa-2,5-dien-1-one (**50**):<sup>1</sup>

Orange oil; Eluent: petroleum ether/ethyl acetate 5:1; 21.4 mg, 26%;

<sup>1</sup>H NMR (400 MHz, Chloroform-*d*) δ 8.16 (d, *J* = 6.9 Hz, 1H), 7.81 (d, *J* = 7.0 Hz, 2H), 7.76 (d, *J* = 9.0 Hz, 1H), 7.46 - 7.30 (m, 4H), 7.13 - 7.07 (m, 2H), 7.00 - 6.92 (m, 1H), 6.89 (d, *J* = 2.5 Hz, 1H), 1.35 (s, 9H), 0.95 (s, 9H); HRMS (ESI-TOF) Calcd for C<sub>28</sub>H<sub>31</sub>N<sub>2</sub>O [M+H]<sup>+</sup>: 411.2431; found: 411.2422.

## 5-2、 Isotope labeling experiments:

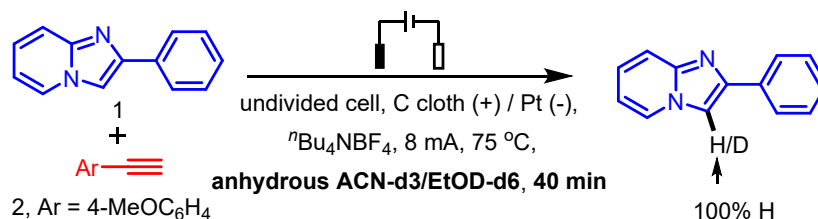

In an undivided cell equipped with a carbon cloth (35 mm x 15 mm) anode and a Pt (10 mm x 10 mm x 0.1 mm) cathode, 2-phenylimidazo[1,2-*a*]pyridine **1** (0.2 mmol, 38.9 mg), 1-ethynyl-4-methoxybenzene **2** (1.2 mmol, 158.6 mg), <sup>n</sup>Bu<sub>4</sub>NBF<sub>4</sub> (0.2

mmol, 65.8 mg) were dissolved in 3 mL CD<sub>3</sub>CN-*d*3 and 7 mL EtOD-*d*6. The mixture above was stirred and electrolyzed at a constant current of 8 mA for 40 min under the N<sub>2</sub> atmosphere. No H/D change was detected.

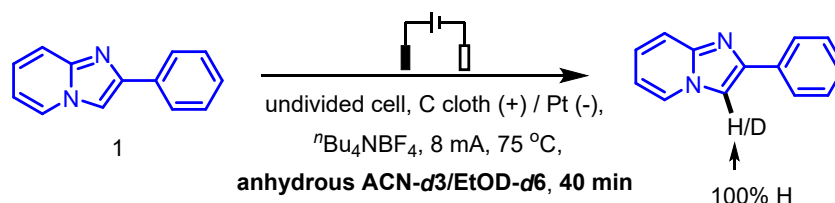

In an undivided cell equipped with a carbon cloth (35 mm x 15 mm) anode and a Pt (10 mm x 10 mm x 0.1 mm) cathode, 2-phenylimidazo[1,2-*a*]pyridine **1** (0.2 mmol, 38.9 mg), <sup>t</sup>Bu<sub>4</sub>NBF<sub>4</sub> (0.2 mmol, 65.8 mg) were dissolved in 3 mL CD<sub>3</sub>CN-*d*3 and 7 mL EtOD-*d*6. The mixture above was stirred and electrolyzed at a constant current of 8 mA for 40 min under the N<sub>2</sub> atmosphere. No H/D change was detected.

### 5-3、Cyclic voltammetry experiments

The undivided cell was equipped with glassy-carbon disk working electrode (diameter, 3.0 mm) and Pt wire auxiliary electrode. The Ag/AgCl was used as reference electrode. The scan range was 0.0 V to 2 V. The scan rate was 100 mVs<sup>-1</sup> (Fig. S2). ACN (3 mL) and EtOH (7 mL) containing <sup>t</sup>Bu<sub>4</sub>NBF<sub>4</sub> (0.2 mmol, 65.8 mg) was poured into the electrochemical cell in all experiments.

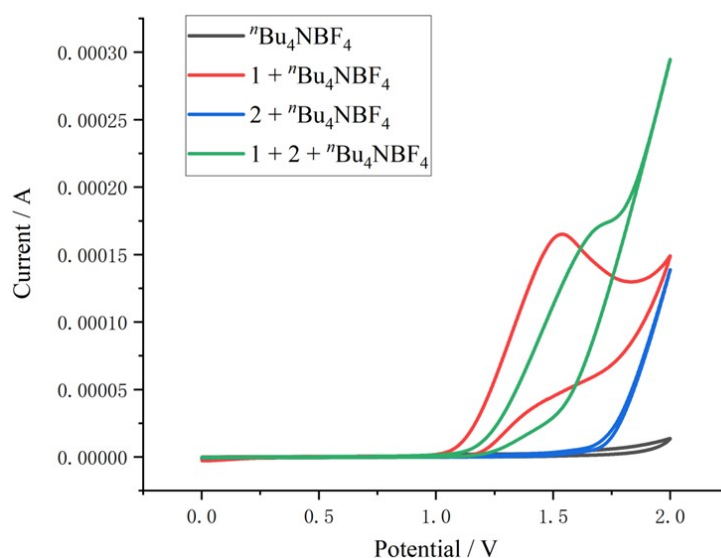

**Figure S2** Cyclic voltammetry experiments of substrates

100 mVs-1: (black) blank; (red) 2-phenylimidazo[1,2-*a*]pyridine **1** (0.2 mmol, 38.9 mg); (blue) 1-ethynyl-4-methoxybenzene **2** (1.2 mmol, 158.6 mg); (green) 2-phenylimidazo[1,2-*a*]pyridine **1** (0.2 mmol, 38.9 mg) and 1-ethynyl-4-methoxybenzene **2** (1.2 mmol, 158.6 mg).

## 6、X-ray Crystallography Studies of Product **23**

Single crystal suitable for X-ray diffraction was obtained by slow evaporation of a saturated solution of compound **23** (cyclohexane/CH<sub>2</sub>Cl<sub>2</sub>) in a loosely capped vial.

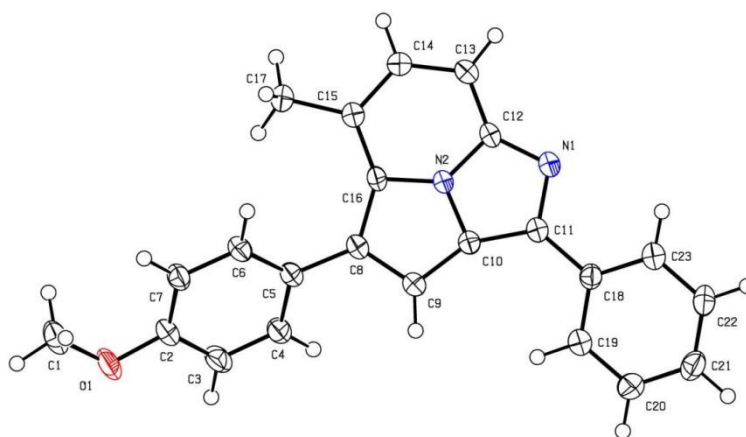

**Figure S3** Structure of **23** by X-Ray crystallographic (CCDC = 2132237 )

**Table S1** Crystal data and structure refinement for **23**

|                   |                                                  |
|-------------------|--------------------------------------------------|
| Empirical formula | C <sub>23</sub> H <sub>18</sub> N <sub>2</sub> O |
| Formula weight    | 338.39                                           |
| Temperature/K     | 193                                              |
| Crystal system    | triclinic                                        |
| Space group       | P-1                                              |
| a/Å               | 8.1325(4)                                        |
| b/Å               | 9.3708(5)                                        |
| c/Å               | 11.6459(7)                                       |
| α/°               | 74.368(2)                                        |
| β/°               | 81.158(2)                                        |

|                                               |                                                              |
|-----------------------------------------------|--------------------------------------------------------------|
| $\gamma/^\circ$                               | 83.467(2)                                                    |
| Volume/ $\text{\AA}^3$                        | 842.08(8)                                                    |
| Z                                             | 2                                                            |
| $\rho_{\text{calc}}/\text{cm}^3$              | 1.335                                                        |
| $\mu/\text{mm}^{-1}$                          | 0.083                                                        |
| F(000)                                        | 356.0                                                        |
| Crystal size/ $\text{mm}^3$                   | $0.12 \times 0.1 \times 0.1$                                 |
| Radiation                                     | MoK $\alpha$ ( $\lambda = 0.71073$ )                         |
| $2\Theta$ range for data collection/ $^\circ$ | 5.04 to 60.044                                               |
| Index ranges                                  | $-11 \leq h \leq 11, -11 \leq k \leq 13, -14 \leq l \leq 16$ |
| Reflections collected                         | 9842                                                         |
| Independent reflections                       | 4853 [Rint = 0.0425, Rsigma = 0.0623]                        |
| Data/restraints/parameters                    | 4853/0/237                                                   |
| Largest diff. peak/hole / $e \text{\AA}^{-3}$ | 0.28/-0.21                                                   |

## 7、 Synthesis of Substrates

### 7-1

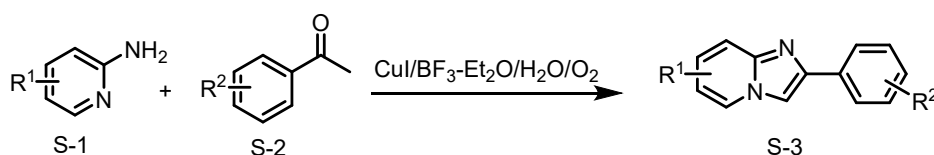

General procedure for the synthesis 2-phenylimidazo[1,2-*a*]pyridine (S-3):<sup>2</sup>

Substituted 2-aminopyridine (5 mmol, 1 eq), acetophenone (10 mmol, 2 eq), CuI (0.25 mmol, 5 mol%, 47 mg), BF<sub>3</sub>·Et<sub>2</sub>O (0.5 mmol, 10 mol%, 70.96 mg) and H<sub>2</sub>O (2 mL) was placed in an oven-dried round bottom flask equipped with a magnetic stir bar. The reaction mixture was stirred at 65 °C for 24 hours under O<sub>2</sub>. After S-1 was consumed, the reaction solution was diluted with ethyl acetate (150 mL) and washed

with brine (150 mL) and H<sub>2</sub>O (150 mL). The separated organic layer was dried with anhydrous Na<sub>2</sub>SO<sub>4</sub> and filtered. The filtrate was concentrated under reduced pressure to obtain a crude product, which was separated by column chromatography (eluent: petroleum ether = 3 : 1) to give the desired product **S-3**.

## 7-2

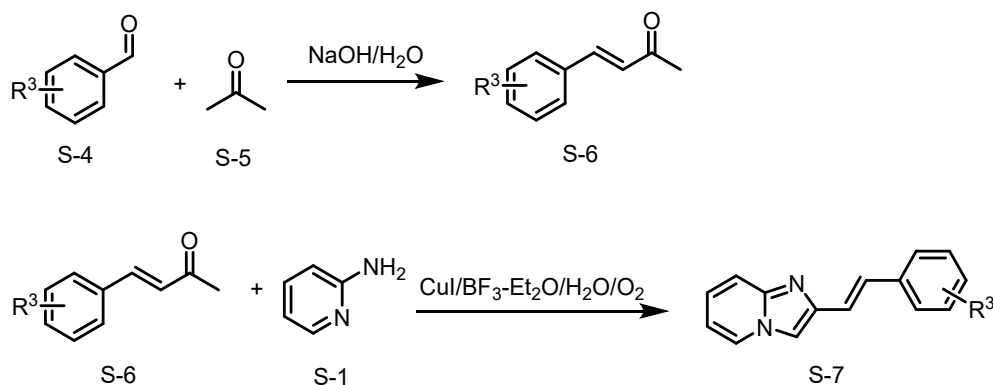

**Step 1:** General procedure for the synthesis of (*E*)-4-phenylbut-3-en-2-one (**S-6**):<sup>3</sup>

Substituted benzaldehyde (36 mmol, 1 eq), acetone (5 mL) and H<sub>2</sub>O (5 mL) was placed in an oven-dried round bottom flask equipped with a magnetic stir bar, then add a 1% aqueous solution of sodium hydroxide (10 mL) slowly to the reaction mixture. The reaction mixture was stirred at 65 °C. After **S-6** was consumed, the reaction solution was diluted with ethyl acetate (150 mL) and washed with brine (150 mL) and H<sub>2</sub>O (150 mL). The separated organic layer was dried with anhydrous Na<sub>2</sub>SO<sub>4</sub> and filtered. The filtrate was concentrated under reduced pressure to obtain a crude product, which was separated by column chromatography (eluent: petroleum ether = 100 : 1) to give the desired product **S-6**.

**Step 2:** General procedure for the synthesis of substrates **S-7**:<sup>2</sup>

2-aminopyridine (5 mmol, 1 eq, 470 mg), (*E*)-4-phenylbut-3-en-2-one (10 mmol, 2 eq), CuI (0.25 mmol, 5 mol%, 47 mg), BF<sub>3</sub>·Et<sub>2</sub>O (0.5 mmol, 10 mol%, 70.96 mg) and H<sub>2</sub>O (2 mL) was placed in an oven-dried round bottom flask equipped with a magnetic stir bar. The reaction mixture was stirred at 65 °C for 24 hours under O<sub>2</sub>. After **S-1** was consumed, the reaction solution was diluted with ethyl acetate (150 mL)

and washed with brine (150 mL) and H<sub>2</sub>O (150 mL). The separated organic layer was dried with anhydrous Na<sub>2</sub>SO<sub>4</sub> and filtered. The filtrate was concentrated under reduced pressure to obtain a crude product, which was separated by column chromatography (eluent: petroleum ether = 3 : 1) to give the desired product **S-7**.

## 8. Characterization Data for Electrolysis Products

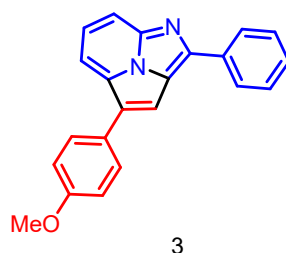

6-(4-methoxyphenyl)-1-phenylimidazo[5,1,2-*cd*]indolizine (**3**):

Light yellow oil; Eluent:petroluem ether/ethyl acetate 25:1; 46.7 mg, 72%;

<sup>1</sup>H NMR (400 MHz, Chloroform-*d*) δ 8.41 (d, *J* = 7.1 Hz, 2H), 8.11 (d, *J* = 7.6 Hz, 1H), 8.03 (d, *J* = 8.0 Hz, 1H), 7.94 (t, *J* = 7.8 Hz, 1H), 7.89 (s, 1H), 7.86 - 7.78 (m, 2H), 7.58 (t, *J* = 7.5 Hz, 2H), 7.48 (t, *J* = 7.4 Hz, 1H), 7.12 - 7.04 (m, 2H), 3.90 (s, 3H); <sup>13</sup>C NMR (101 MHz, Chloroform-*d*) δ 159.35, 149.35, 140.55, 134.06, 131.32, 130.89, 129.89, 129.21, 128.83, 128.25, 127.62, 126.96, 124.88, 114.83, 114.28, 113.63, 111.78, 55.55; HRMS (EI-TOF) Calcd for C<sub>22</sub>H<sub>17</sub>N<sub>2</sub>O [M+H]<sup>+</sup>: 325.1335; found: 325.1338.

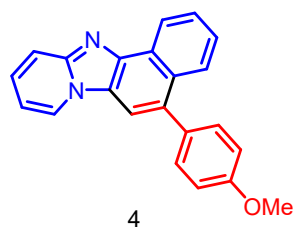

5-(4-methoxyphenyl)naphtho[1',2':4,5]imidazo[1,2-*a*]pyridine (**4**):

Brown solid; Eluent:petroluem ether/ethyl acetate 5:1; 20.8 mg, 8%;

<sup>1</sup>H NMR (400 MHz, Chloroform-*d*) δ 8.94 (d, *J* = 8.1 Hz, 1H), 8.51 (d, *J* = 6.8 Hz, 1H), 8.02 (d, *J* = 8.5 Hz, 1H), 7.93 (d, *J* = 9.2 Hz, 1H), 7.84 (s, 1H), 7.76 - 7.70 (m,

1H), 7.56 (t,  $J = 7.7$  Hz, 1H), 7.48 (dd,  $J = 9.0, 2.8$  Hz, 3H), 7.16 -7.03 (m, 2H), 6.98 (t,  $J = 6.7$  Hz, 1H), 3.92 (s, 3H);  $^{13}\text{C}$  NMR (101 MHz, Chloroform-*d*)  $\delta$  159.20, 146.86, 135.35, 133.30, 132.16, 131.53, 131.17, 130.11, 128.34, 127.97, 126.54, 126.32, 124.59, 123.86, 123.50, 117.75, 113.93, 111.95, 110.87, 55.54; HRMS (EI-TOF) Calcd for  $\text{C}_{22}\text{H}_{17}\text{N}_2\text{O}$   $[\text{M}+\text{H}]^+$ : 325.1335; found: 325.1334.

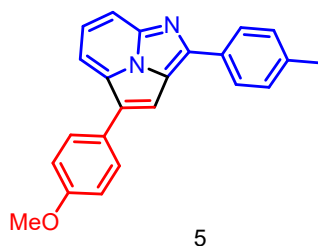

6-(4-methoxyphenyl)-1-(p-tolyl)imidazo[5,1,2-*cd*]indolizine (**5**):

Yellow solid; Eluent: petroluem ether/ethyl acetate 20:1; 55.5 mg, 82%;

$^1\text{H}$  NMR (400 MHz, Chloroform-*d*)  $\delta$  8.29 (d,  $J = 7.8$  Hz, 2H), 8.08 (d,  $J = 7.6$  Hz, 1H), 7.99 (d,  $J = 7.9$  Hz, 1H), 7.92 (t,  $J = 7.8$  Hz, 1H), 7.87 (s, 1H), 7.85 - 7.77 (m, 2H), 7.37 (d,  $J = 7.8$  Hz, 2H), 7.11 - 7.03 (m, 2H), 3.90 (s, 3H), 2.46 (s, 3H);  $^{13}\text{C}$  NMR (101 MHz, Chloroform-*d*)  $\delta$  159.31, 149.63, 140.58, 140.23, 131.27, 131.04, 130.77, 129.98, 128.83, 128.20, 127.72, 126.88, 124.71, 114.82, 114.26, 113.44, 111.42, 55.56, 21.70; HRMS (EI-TOF) Calcd for  $\text{C}_{23}\text{H}_{19}\text{N}_2\text{O}$   $[\text{M}+\text{H}]^+$ : 339.1429; found: 339.1500.

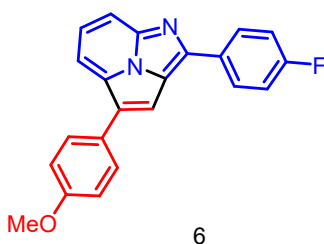

1-(4-fluorophenyl)-6-(4-methoxyphenyl)imidazo[5,1,2-*cd*]indolizine (**6**):

Yellow solid; Eluent: petroluem ether/ethyl acetate 15:1; 40.4 mg, 59%;

$^1\text{H}$  NMR (400 MHz, Chloroform-*d*)  $\delta$  8.33 (t,  $J = 5.4$  Hz, 2H), 8.04 (d,  $J = 7.6$  Hz, 1H), 7.97 (d,  $J = 7.8$  Hz, 1H), 7.89 (t,  $J = 7.8$  Hz, 1H), 7.76 (d,  $J = 8.8$  Hz, 1H), 7.23 (d,  $J = 8.0$  Hz, 3H), 7.08 - 7.02 (m, 3H), 3.89 (s, 3H);  $^{13}\text{C}$  NMR (101 MHz,

Chloroform-*d*)  $\delta$  165.10, 162.61, 159.35, 148.23, 140.48, 131.33, 130.83, 130.35, 129.99 (d,  $J = 9.1$  Hz), 128.76, 127.50, 126.96, 124.51, 116.35, 116.13, 114.80, 113.92, 113.60, 111.68, 55.52;  $^{19}\text{F}$  NMR (376 MHz, Chloroform-*d*)  $\delta$  -110.73; HRMS (EI-TOF) Calcd for  $\text{C}_{22}\text{H}_{16}\text{FN}_2\text{O}$   $[\text{M}+\text{H}]^+$ : 343.1241; found: 343.1250.

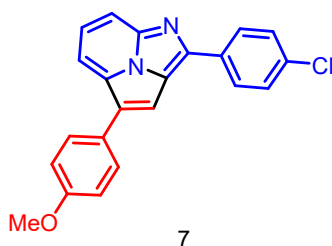

1-(4-chlorophenyl)-6-(4-methoxyphenyl)imidazo[5,1,2-*cd*]indolizine (**7**):

Yellow solid; Eluent: petroluem ether/ethyl acetate 15:1; 55.3 mg, 77%;

$^1\text{H}$  NMR (400 MHz, Chloroform-*d*)  $\delta$  8.33 - 8.26 (m, 2H), 8.10 (d,  $J = 7.6$  Hz, 1H), 8.02 (d,  $J = 8.0$  Hz, 1H), 7.94 (t,  $J = 7.8$  Hz, 1H), 7.83 (s, 1H), 7.80 (d,  $J = 8.7$  Hz, 2H), 7.55 - 7.48 (m, 2H), 7.12 - 7.03 (m, 2H), 3.90 (s, 3H);  $^{13}\text{C}$  NMR (101 MHz, Chloroform-*d*)  $\delta$  159.48, 147.75, 140.37, 135.84, 132.48, 131.79, 131.03, 129.47, 129.35, 128.87, 127.41, 127.28, 124.73, 114.87, 114.06, 113.91, 112.00, 55.57; HRMS (EI-TOF) Calcd for  $\text{C}_{22}\text{H}_{16}\text{ClN}_2\text{O}$   $[\text{M}+\text{H}]^+$ : 359.0946; found: 359.0953.

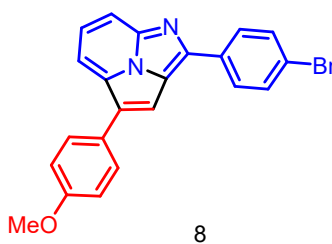

1-(4-bromophenyl)-6-(4-methoxyphenyl)imidazo[5,1,2-*cd*]indolizine (**8**):

Yellow solid; Eluent: petroluem ether/ethyl acetate 15:1; 54.4 mg, 67%;

$^1\text{H}$  NMR (400 MHz, Chloroform-*d*)  $\delta$  8.25 (d,  $J = 8.5$  Hz, 2H), 8.12 (d,  $J = 7.6$  Hz, 1H), 8.03 (d,  $J = 8.0$  Hz, 1H), 7.96 (t,  $J = 7.8$  Hz, 1H), 7.85 (s, 1H), 7.83 - 7.79 (m, 2H), 7.72 - 7.65 (m, 2H), 7.12 - 7.04 (m, 2H), 3.91 (s, 3H);  $^{13}\text{C}$  NMR (101 MHz, Chloroform-*d*)  $\delta$  159.50, 147.83, 140.41, 132.97, 132.44, 131.84, 131.08, 129.60, 128.90, 127.43, 127.30, 124.77, 124.21, 114.89, 114.10, 113.95, 112.05, 55.59;



HRMS (EI-TOF) Calcd for  $C_{22}H_{16}BrN_2O$   $[M+H]^+$ : 403.0441; found: 403.0438

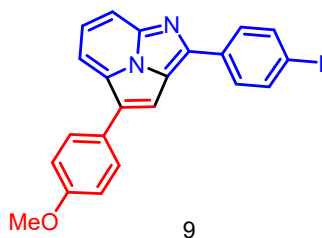

1-(4-iodophenyl)-6-(4-methoxyphenyl)imidazo[5,1,2-*cd*]indolizine (**9**):

Yellow solid; Eluent: petroluem ether/ethyl acetate 15:1; 79.25 mg, 88%;

$^1H$  NMR (400 MHz, Chloroform-*d*)  $\delta$  8.13 - 8.10 (m, 2H), 8.09 (s, 1H), 8.02 (d,  $J$  = 8.0 Hz, 1H), 7.95 (t,  $J$  = 7.8 Hz, 1H), 7.89 (d,  $J$  = 8.3 Hz, 2H), 7.83 (s, 1H), 7.82 - 7.77 (m, 2H), 7.11 - 7.04 (m, 2H), 3.91 (s, 3H);  $^{13}C$  NMR (101 MHz, Chloroform-*d*)  $\delta$  159.50, 147.89, 140.36, 138.37, 133.49, 131.84, 131.07, 129.68, 128.89, 127.41, 127.31, 124.78, 114.88, 114.08, 113.98, 112.07, 96.14, 55.59; HRMS (EI-TOF) Calcd for  $C_{22}H_{16}IN_2O$   $[M+H]^+$ : 451.0302; found: 451.0292.

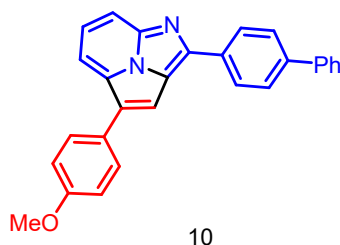

1-([1,1'-biphenyl]-4-yl)-6-(4-methoxyphenyl)imidazo[5,1,2-*cd*]indolizine (**10**):

Yellow solid; Eluent: petroluem ether/ethyl acetate 20:1; 44.85 mg, 56%;

$^1H$  NMR (400 MHz, Chloroform-*d*)  $\delta$  8.46 (d,  $J$  = 6.9 Hz, 2H), 8.10 (d,  $J$  = 6.4 Hz, 1H), 8.04 (d,  $J$  = 8.0 Hz, 1H), 7.99 - 7.92 (m, 1H), 7.91 (s, 1H), 7.85 - 7.77 (m, 4H), 7.70 (d,  $J$  = 5.5 Hz, 2H), 7.54 - 7.44 (m, 2H), 7.39 (t,  $J$  = 7.4 Hz, 1H), 7.11 - 7.05 (m, 2H), 3.90 (s, 3H);  $^{13}C$  NMR (101 MHz, Chloroform-*d*)  $\delta$  159.44, 148.57, 142.66, 140.51, 140.35, 132.70, 131.60, 130.94, 129.05, 128.87, 128.69, 127.89, 127.76, 127.52, 127.23, 124.85, 114.86, 114.31, 113.76, 111.66, 55.57; HRMS (EI-TOF) Calcd for  $C_{28}H_{21}N_2O$   $[M+H]^+$ : 401.1648; found: 401.1676.

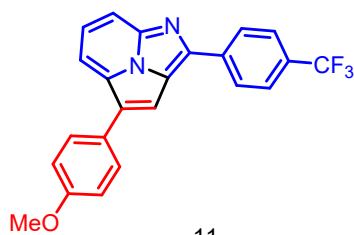

11

6-(4-methoxyphenyl)-1-(4-(trifluoromethyl)phenyl)imidazo[5,1,2-*cd*]indolizine (**11**):

Yellow solid; Eluent:petroluem ether/ethyl acetate 20:1; 42.4 mg, 54%;

$^1\text{H}$  NMR (400 MHz, Chloroform-*d*)  $\delta$  8.49 (d,  $J = 8.0$  Hz, 2H), 8.14 (d,  $J = 7.6$  Hz, 1H), 8.08 (d,  $J = 8.1$  Hz, 1H), 7.99 (t,  $J = 7.8$  Hz, 1H), 7.88 (s, 1H), 7.85 - 7.78 (m, 4H), 7.13 - 7.06 (m, 2H), 3.91 (s, 3H);  $^{13}\text{C}$  NMR (101 MHz, Chloroform-*d*)  $\delta$  159.64, 146.80, 137.29, 132.51, 131.32, 128.95, 128.32, 127.61, 127.21, 126.18 (q,  $J = 4.1$  Hz), 125.16, 114.93, 114.34, 114.15, 112.63, 55.59;  $^{19}\text{F}$  NMR (376 MHz, Chloroform-*d*)  $\delta$  -62.64; HRMS (EI-TOF) Calcd for  $\text{C}_{23}\text{H}_{16}\text{F}_3\text{N}_2\text{O}$   $[\text{M}+\text{H}]^+$ : 393.1209; found: 393.1210.

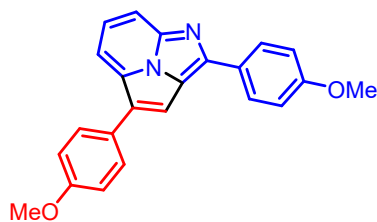

12

3-methoxy-5-(4-methoxyphenyl)naphtho[1',2':4,5]imidazo[1,2-*a*]pyridine (**12**):

Yellow solid; Eluent: petroluem ether/ethyl acetate 20:1; 34.75 mg, 49%;

$^1\text{H}$  NMR (400 MHz, Chloroform-*d*)  $\delta$  8.35 (d,  $J = 8.8$  Hz, 2H), 8.07 (d,  $J = 7.5$  Hz, 1H), 7.97 (d,  $J = 7.9$  Hz, 1H), 7.91 (t,  $J = 7.8$  Hz, 1H), 7.85 (s, 1H), 7.83 - 7.78 (m, 2H), 7.08 (t,  $J = 8.3$  Hz, 4H), 3.91 (s, 3H), 3.90 (s, 3H);  $^{13}\text{C}$  NMR (101 MHz, Chloroform-*d*)  $\delta$  161.28, 159.28, 149.54, 140.66, 132.30, 130.79, 130.64, 129.78, 129.02, 128.80, 127.79, 126.83, 126.74, 124.39, 114.82, 114.71, 114.10, 113.24, 110.98, 55.57; HRMS (EI-TOF) Calcd for  $\text{C}_{23}\text{H}_{19}\text{N}_2\text{O}_2$   $[\text{M}+\text{H}]^+$ : 355.1441; found: 355.1446.

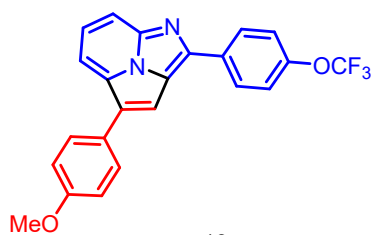

6-(4-methoxyphenyl)-1-(4-(trifluoromethoxy)phenyl)imidazo[5,1,2-*cd*]indolizine (**13**):

Yellow solid; Eluent: petroluem ether/ethyl acetate 20:1; 46.5 mg, 57%;

$^1\text{H}$  NMR (400 MHz, Chloroform-*d*)  $\delta$  8.45 - 8.38 (m, 2H), 8.12 (d,  $J = 7.6$  Hz, 1H), 8.04 (d,  $J = 8.0$  Hz, 1H), 7.96 (t,  $J = 7.8$  Hz, 1H), 7.85 (s, 1H), 7.84 - 7.78 (m, 2H), 7.41 (d,  $J = 8.8$  Hz, 2H), 7.12 - 7.05 (m, 2H), 3.91 (s, 3H);  $^{13}\text{C}$  NMR (101 MHz, Chloroform-*d*)  $\delta$  159.51, 150.31, 147.54, 140.45, 132.75, 131.89, 131.10, 129.63, 128.90, 127.34 (d,  $J = 14.2$  Hz), 124.79, 121.93, 121.56, 114.89, 114.04, 113.96, 112.14, 55.58;  $^{19}\text{F}$  NMR (376 MHz, Chloroform-*d*)  $\delta$  -57.60; HRMS (EI-TOF) Calcd for  $\text{C}_{23}\text{H}_{16}\text{F}_3\text{N}_2\text{O}_2$   $[\text{M}+\text{H}]^+$ : 409.1158; found: 409.1156.

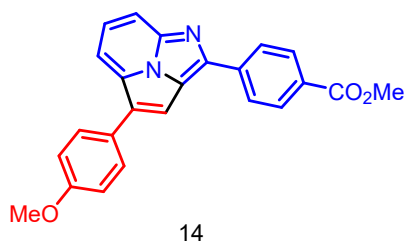

methyl 4-(6-(4-methoxyphenyl)imidazo[5,1,2-*cd*]indolizin-1-yl)benzoate (**14**):

Yellow solid; Eluent: petroluem ether/ethyl acetate 20:1; 42.9 mg, 56%;

$^1\text{H}$  NMR (400 MHz, Chloroform-*d*)  $\delta$  8.45 (d,  $J = 8.1$  Hz, 2H), 8.21 (d,  $J = 8.0$  Hz, 2H), 8.14 (d,  $J = 7.5$  Hz, 1H), 8.08 (d, 1H), 7.99 (t,  $J = 7.8$  Hz, 1H), 7.90 (s, 1H), 7.82 (d,  $J = 8.2$  Hz, 2H), 7.08 (d,  $J = 8.2$  Hz, 2H), 3.97 (s, 3H), 3.91 (s, 3H);  $^{13}\text{C}$  NMR (101 MHz, Chloroform-*d*)  $\delta$  166.87, 159.63, 146.94, 140.11, 137.87, 132.57, 131.31, 130.96, 130.48, 128.95, 128.00, 127.72, 127.18, 126.40, 125.25, 114.92, 114.36, 112.51, 55.58, 52.42; HRMS (EI-TOF) Calcd for  $\text{C}_{24}\text{H}_{19}\text{N}_2\text{O}_3$   $[\text{M}+\text{H}]^+$ : 383.139; found: 383.1394.

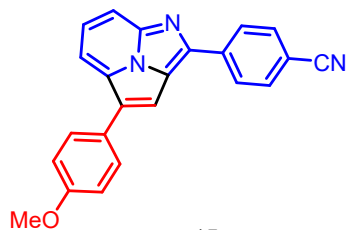

15

4-(6-(4-methoxyphenyl)imidazo[5,1,2-*cd*]indolizin-1-yl)benzonitrile (**15**):

Orange solid; Eluent: petroluem ether/ethyl acetate 15:1; 58.0 mg, 83%;

$^1\text{H}$  NMR (400 MHz, Chloroform-*d*)  $\delta$  8.44 (d,  $J = 8.3$  Hz, 2H), 8.15 (d,  $J = 7.5$  Hz, 1H), 8.08 (d,  $J = 8.1$  Hz, 1H), 7.99 (t,  $J = 7.8$  Hz, 1H), 7.85 (s, 1H), 7.81 (dd,  $J = 8.6$ , 1.8 Hz, 4H), 7.12 - 7.06 (m, 2H), 3.91 (s, 3H);  $^{13}\text{C}$  NMR (101 MHz, Chloroform-*d*)  $\delta$  159.69, 146.18, 140.43, 138.38, 132.90, 132.79, 131.42, 128.95, 128.38, 127.71, 127.10, 125.43, 118.93, 114.95, 114.57, 113.97, 113.04, 112.67, 55.59; HRMS (EI-TOF) Calcd for  $\text{C}_{23}\text{H}_{16}\text{N}_3\text{O}$   $[\text{M}+\text{H}]^+$ : 372.1107; found: 372.1123.

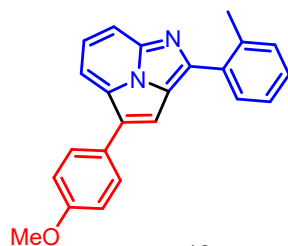

16

6-(4-methoxyphenyl)-1-(*o*-tolyl)imidazo[5,1,2-*cd*]indolizine (**16**):

Yellow solid; Eluent: petroluem ether/ethyl acetate 20:1; 31.2 mg, 23%;

$^1\text{H}$  NMR (400 MHz, Chloroform-*d*)  $\delta$  8.51 (d,  $J = 6.9$  Hz, 1H), 7.96 (d,  $J = 9.3$  Hz, 1H), 7.87 (d,  $J = 8.9$  Hz, 2H), 7.51 (d,  $J = 7.0$  Hz, 1H), 7.50 - 7.45 (m, 2H), 7.45 - 7.40 (m, 2H), 7.10 - 7.03 (m, 2H), 6.96 (t,  $J = 6.8$  Hz, 1H), 3.92 (s, 3H), 3.43 (s, 3H);  $^{13}\text{C}$  NMR (101 MHz, Chloroform-*d*)  $\delta$  159.13, 146.17, 136.52, 135.65, 134.19, 132.34, 131.60, 128.83, 127.26, 126.28, 125.40, 124.81, 124.11, 118.41, 113.88, 111.52, 110.97, 55.55, 24.38; HRMS (EI-TOF) Calcd for  $\text{C}_{23}\text{H}_{19}\text{N}_2\text{O}$   $[\text{M}+\text{H}]^+$ : 339.1492; found: 339.1492.

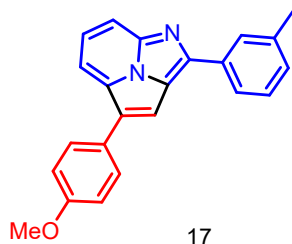

6-(4-methoxyphenyl)-1-(*m*-tolyl)imidazo[5,1,2-*cd*]indolizine (**17**):

Yellow solid; Eluent: petroluem ether/ethyl acetate 20:1; 48.8 mg, 72%;

$^1\text{H}$  NMR (400 MHz, Chloroform-*d*)  $\delta$  8.25 (s, 1H), 8.19 (d,  $J = 7.6$  Hz, 1H), 8.12 (d,  $J = 7.7$  Hz, 1H), 8.05 (d,  $J = 8.0$  Hz, 1H), 7.96 (t,  $J = 7.8$  Hz, 1H), 7.91 (s, 1H), 7.86 - 7.80 (m, 2H), 7.47 (t,  $J = 7.7$  Hz, 1H), 7.30 (d,  $J = 8.1$  Hz, 1H), 7.13 - 7.05 (m, 2H), 3.91 (s, 3H), 2.51 (s, 3H);  $^{13}\text{C}$  NMR (101 MHz, Chloroform-*d*)  $\delta$  159.43, 140.30, 139.04, 131.52, 130.96, 130.91, 129.16, 128.90, 128.80, 127.59, 127.18, 125.60, 124.81, 114.87, 114.49, 113.72, 111.66, 55.58, 21.66; HRMS (EI-TOF) Calcd for  $\text{C}_{23}\text{H}_{19}\text{N}_2\text{O}$   $[\text{M}+\text{H}]^+$ : 339.1492; found: 339.1500.

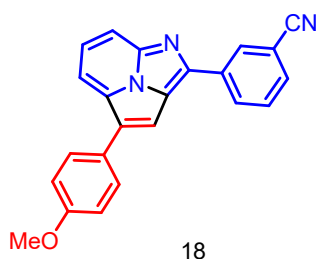

3-(6-(4-methoxyphenyl)imidazo[5,1,2-*cd*]indolizin-1-yl)benzonitrile(**18**):

Orange solid; Eluent: petroluem ether/ethyl acetate 15:1; 47.6 mg, 68%;

$^1\text{H}$  NMR (400 MHz, Chloroform-*d*)  $\delta$  8.66 - 8.58 (m, 2H), 8.16 (d,  $J = 7.5$  Hz, 1H), 8.08 (d,  $J = 8.1$  Hz, 1H), 8.00 (t,  $J = 7.8$  Hz, 1H), 7.88 (s, 1H), 7.86 - 7.79 (m, 2H), 7.73 (d,  $J = 7.7$  Hz, 1H), 7.67 (t,  $J = 7.7$  Hz, 1H), 7.13 - 7.05 (m, 2H), 3.91 (s, 3H);  $^{13}\text{C}$  NMR (101 MHz, Chloroform-*d*)  $\delta$  159.66, 140.31, 135.41, 132.72, 132.64, 132.05, 131.52, 131.37, 130.08, 128.94, 127.66, 127.13, 124.91, 118.72, 114.94, 114.46, 113.90, 113.52, 112.77, 55.59; HRMS (EI-TOF) Calcd for  $\text{C}_{23}\text{H}_{16}\text{N}_3\text{O}$   $[\text{M}+\text{H}]^+$ : 350.1288; found: 350.1292.

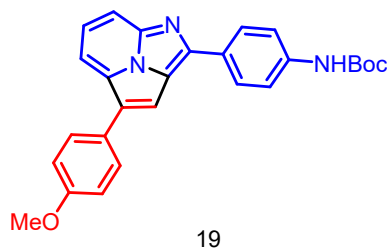

*tert*-butyl(4-(6-(4-methoxyphenyl)imidazo[5,1,2-*cd*]indolizin-1-yl)phenyl)carbamate  
(19)

Yellow solid; Eluent: petroluem ether/ethyl acetate 20:1; 34.3 mg, 39%;

<sup>1</sup>H NMR (400 MHz, Chloroform-*d*) δ 8.32 (d, *J* = 6.1 Hz, 2H), 8.08 (d, *J* = 7.5 Hz, 1H), 7.97 (d, *J* = 22.1 Hz, 2H), 7.85 (s, 1H), 7.80 (d, *J* = 8.2 Hz, 2H), 7.58 (s, 2H), 7.07 (d, *J* = 8.1 Hz, 2H), 6.81 (s, 1H), 3.90 (s, 3H), 1.55 (s, 9H); <sup>13</sup>C NMR (101 MHz, Chloroform-*d*) δ 159.40, 152.63, 148.39, 140.34, 140.03, 131.44, 130.81, 129.22, 128.85, 128.05, 127.49, 127.33, 124.28, 118.80, 114.85, 114.32, 113.61, 111.16, 81.13, 55.56, 28.47; HRMS (EI-TOF) Calcd for C<sub>27</sub>H<sub>26</sub>N<sub>3</sub>O<sub>3</sub> [M+H]<sup>+</sup>: 440.1969; found: 440.1961.

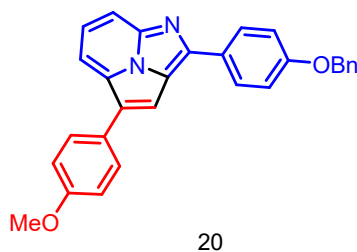

1-(4-(benzyloxy)phenyl)-6-(4-methoxyphenyl)imidazo[5,1,2-*cd*]indolizine (20)

Yellow solid; Eluent: petroluem ether/ethyl acetate 20:1; 38.8 mg, 45%;

<sup>1</sup>H NMR (400 MHz, Chloroform-*d*) δ 8.31 (s, 2H), 8.05 (d, *J* = 7.8 Hz, 2H), 7.93 (d, *J* = 7.1 Hz, 1H), 7.79 (t, *J* = 10.6 Hz, 3H), 7.44 (d, *J* = 19.6 Hz, 4H), 7.36 (d, *J* = 7.3 Hz, 1H), 7.13 (d, *J* = 7.7 Hz, 2H), 7.06 (d, *J* = 7.8 Hz, 2H), 5.15 (s, 2H), 3.89 (s, 3H); <sup>13</sup>C NMR (101 MHz, Chloroform-*d*) δ 160.72, 159.47, 147.71, 139.36, 136.63, 131.72, 130.80, 129.99, 128.81, 128.29, 127.68, 127.26, 125.66, 123.81, 115.68, 114.85, 114.43, 113.73, 110.81, 70.28, 55.55; HRMS (EI-TOF) Calcd for C<sub>29</sub>H<sub>23</sub>N<sub>2</sub>O<sub>2</sub> [M+H]<sup>+</sup>: 431.1754; found: 431.1754.

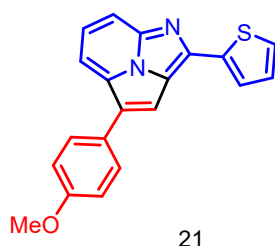

6-(4-methoxyphenyl)-1-(thiophen-2-yl)imidazo[5,1,2-*cd*]indolizine (**21**)

Yellow solid; Eluent: petroluem ether/ethyl acetate 15:1; 59.5 mg, 45%;

$^1\text{H}$  NMR (400 MHz, Chloroform-*d*)  $\delta$  8.09 (d,  $J = 7.5$  Hz, 1H), 8.01 - 7.95 (m, 2H), 7.92 (t,  $J = 7.8$  Hz, 1H), 7.81 (d,  $J = 9.1$  Hz, 3H), 7.53 (d,  $J = 5.0$  Hz, 1H), 7.27 - 7.21 (m, 1H), 7.11 - 7.04 (m, 2H), 3.90 (s, 3H);  $^{13}\text{C}$  NMR (101 MHz, Chloroform-*d*)  $\delta$  159.42, 140.42, 131.34, 130.93, 129.05, 128.86, 128.66, 128.60, 128.05, 127.55, 127.27, 123.98, 117.34, 114.86, 113.75, 113.29, 111.49, 55.57; HRMS (EI-TOF) Calcd for  $\text{C}_{20}\text{H}_{15}\text{N}_2\text{O}_\text{S}$   $[\text{M}+\text{H}]^+$ : 331.09; found: 331.0894.

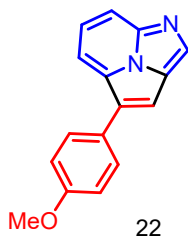

6-(4-methoxyphenyl)imidazo[5,1,2-*cd*]indolizine (**22**)

Light yellow oil; Eluent: petroluem ether/ethyl acetate 10:1; 41.3 mg, 83%;

$^1\text{H}$  NMR (400 MHz, Chloroform-*d*)  $\delta$  8.54 (s, 1H), 8.19 (d,  $J = 7.6$  Hz, 1H), 8.12 (d,  $J = 8.1$  Hz, 1H), 8.00 (t,  $J = 7.9$  Hz, 1H), 7.84 - 7.76 (m, 2H), 7.73 (s, 1H), 7.12 - 7.04 (m, 2H), 3.90 (s, 3H);  $^{13}\text{C}$  NMR (101 MHz, Chloroform-*d*)  $\delta$  159.41, 137.43, 133.12, 131.67, 131.36, 128.93, 127.58, 126.45, 114.85, 114.16, 113.87, 112.78, 55.57; HRMS (EI-TOF) Calcd for  $\text{C}_{16}\text{H}_{13}\text{N}_2\text{O}$   $[\text{M}+\text{H}]^+$ : 249.1022; found: 249.1022.

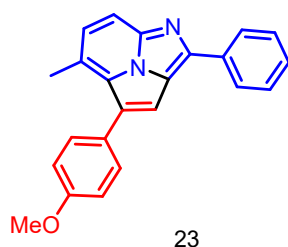

6-(4-methoxyphenyl)-5-methyl-1-phenylimidazo[5,1,2-*cd*]indolizine (**23**):

Yellow solid; Eluent: petroluem ether/ethyl acetate 20:1; 62.3 mg, 92%;

$^1\text{H}$  NMR (400 MHz, Chloroform-*d*)  $\delta$  8.36 (d,  $J = 7.0$  Hz, 2H), 7.87 (d,  $J = 8.1$  Hz, 1H), 7.63 (s, 1H), 7.61 (d,  $J = 8.2$  Hz, 1H), 7.56 - 7.49 (m, 4H), 7.42 (t,  $J = 7.3$  Hz, 1H), 7.05 - 6.97 (m, 2H), 3.87 (s, 3H), 2.66 (s, 3H);  $^{13}\text{C}$  NMR (101 MHz, Chloroform-*d*)  $\delta$  159.29, 148.32, 139.21, 134.28, 132.42, 131.23, 129.49, 129.46, 129.37, 129.07, 127.94, 127.88, 125.61, 124.55, 116.49, 113.86, 111.50, 55.42, 18.46; HRMS (EI-TOF) Calcd for  $\text{C}_{23}\text{H}_{19}\text{N}_2\text{O}$   $[\text{M}+\text{H}]^+$ : 339.1492; found: 399.1492.

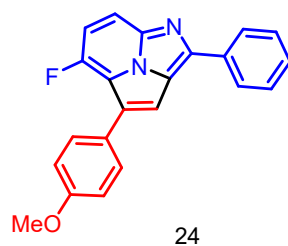

5-fluoro-6-(4-methoxyphenyl)-1-phenylimidazo[5,1,2-*cd*]indolizine (**24**):

Yellow solid; Eluent: petroluem ether/ethyl acetate 60:1; 58.9 mg, 86%;

$^1\text{H}$  NMR (400 MHz, Chloroform-*d*)  $\delta$  8.36 (d,  $J = 6.9$  Hz, 2H), 7.92 (dd,  $J = 8.5, 3.0$  Hz, 1H), 7.86 - 7.79 (m, 3H), 7.66 (dd,  $J = 11.4, 8.5$  Hz, 1H), 7.57 (t,  $J = 7.6$  Hz, 2H), 7.48 (t,  $J = 7.4$  Hz, 1H), 7.09 - 7.02 (m, 2H), 3.90 (s, 3H);  $^{13}\text{C}$  NMR (101 MHz, Chloroform-*d*)  $\delta$  159.54, 152.84, 150.53 (d,  $J = 5.1$  Hz), 150.35, 138.02, 133.85, 131.16 (d,  $J = 5.1$  Hz), 130.04, 129.67 (d,  $J = 4.1$  Hz), 129.26, 128.09, 126.54 (d,  $J = 3.1$  Hz), 119.10, 118.80, 115.13, 114.89, 114.54, 114.31 (d,  $J = 3.1$  Hz), 112.12 (d,  $J = 8.1$  Hz), 55.53;  $^{19}\text{F}$  NMR (376 MHz, Chloroform-*d*)  $\delta$  -124.01; HRMS (EI-TOF) Calcd for  $\text{C}_{22}\text{H}_{16}\text{FN}_2\text{O}$   $[\text{M}+\text{H}]^+$ : 343.1241; found: 343.1249.



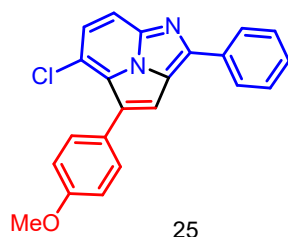

5-chloro-6-(4-methoxyphenyl)-1-phenylimidazo[5,1,2-*cd*]indolizine (**25**):

Yellow solid; Eluent: petroluem ether/ethyl acetate 40:1; 63.2 mg, 88%;

<sup>1</sup>H NMR (400 MHz, Chloroform-*d*) δ 8.36 (d, *J* = 7.1 Hz, 2H), 7.92 (d, *J* = 8.4 Hz, 1H), 7.84 (d, *J* = 8.4 Hz, 1H), 7.75 (s, 1H), 7.68 (d, *J* = 8.6 Hz, 2H), 7.56 (t, *J* = 7.5 Hz, 2H), 7.49 (d, *J* = 7.2 Hz, 1H), 7.07 - 7.01 (m, 2H), 3.90 (s, 3H); <sup>13</sup>C NMR (101 MHz, Chloroform-*d*) δ 159.59, 150.19, 139.32, 133.52, 132.55, 131.63, 130.26, 129.29, 128.57, 128.24, 127.52, 126.31, 125.21, 121.39, 117.80, 113.82, 111.84, 55.50; HRMS (EI-TOF) Calcd for C<sub>22</sub>H<sub>16</sub>ClN<sub>2</sub>O [M+H]<sup>+</sup>: 359.0946; found: 359.0941.

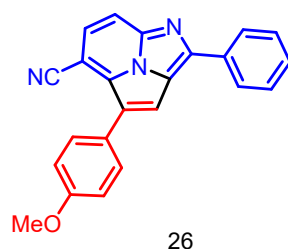

6-(4-methoxyphenyl)-1-phenylimidazo[5,1,2-*cd*]indolizine-5-carbonitrile (**26**):

Orange solid; Eluent: petroluem ether/ethyl acetate 20:1; 45.5 mg, 65%;

<sup>1</sup>H NMR (400 MHz, Chloroform-*d*) δ 8.41 (d, *J* = 7.4 Hz, 2H), 8.19 (d, *J* = 7.2 Hz, 1H), 8.08 (d, *J* = 8.0 Hz, 1H), 7.94 (s, 1H), 7.75 (d, *J* = 8.3 Hz, 2H), 7.60 (t, *J* = 7.2 Hz, 2H), 7.57 - 7.52 (m, 1H), 7.11 (d, *J* = 8.2 Hz, 2H), 3.91 (s, 3H); <sup>13</sup>C NMR (101 MHz, Chloroform-*d*) δ 160.19, 153.46, 141.81, 132.86, 131.78, 131.26, 131.02, 130.96, 129.51, 128.81, 125.48, 124.94, 119.44, 116.82, 114.48, 111.52, 97.43, 55.55; HRMS (EI-TOF) Calcd for C<sub>23</sub>H<sub>16</sub>N<sub>3</sub>O [M+H]<sup>+</sup>: 350.1288; found: 350.1292.

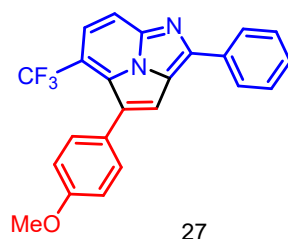

6-(4-methoxyphenyl)-1-phenyl-5-(trifluoromethyl)imidazo[5,1,2-*cd*]indolizine (**27**):

Yellow solid; Eluent: petroluem ether/ethyl acetate 150:1; 55.8 mg, 71%;

$^1\text{H}$  NMR (400 MHz, Chloroform-*d*)  $\delta$  8.39 (d,  $J = 7.0$  Hz, 2H), 8.18 (d,  $J = 8.3$  Hz, 1H), 8.06 (d,  $J = 8.3$  Hz, 1H), 7.83 (s, 1H), 7.57 (t,  $J = 7.4$  Hz, 2H), 7.51 (d,  $J = 8.7$  Hz, 3H), 7.02 (d,  $J = 8.3$  Hz, 2H), 3.90 (s, 3H);  $^{13}\text{C}$  NMR (101 MHz, Chloroform-*d*)  $\delta$  159.63, 152.95, 141.84, 133.30, 132.44, 131.39, 130.79, 129.35, 128.57, 128.10, 127.82, 127.04, 125.24, 125.12, 124.52 (q,  $J = 5.1$  Hz), 122.42, 120.80, 117.21, 116.86, 116.51, 113.58, 110.65, 55.45;  $^{19}\text{F}$  NMR (376 MHz, Chloroform-*d*)  $\delta$  -55.05; HRMS (EI-TOF) Calcd for  $\text{C}_{23}\text{H}_{16}\text{F}_3\text{N}_2\text{O}$   $[\text{M}+\text{H}]^+$ : 393.1029; found: 393.1200.

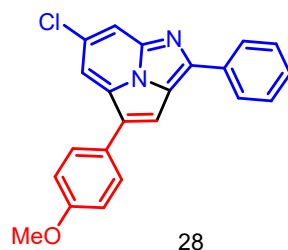

4-chloro-6-(4-methoxyphenyl)-1-phenylimidazo[5,1,2-*cd*]indolizine (**28**):

Yellow solid; Eluent: petroluem ether/ethyl acetate 40:1; 53.8 mg, 75%;

$^1\text{H}$  NMR (400 MHz, Chloroform-*d*)  $\delta$  8.38 - 8.31 (m, 2H), 8.07 (s, 1H), 7.99 (s, 1H), 7.85 (s, 1H), 7.78 - 7.70 (m, 2H), 7.56 (t,  $J = 7.4$  Hz, 2H), 7.49 (t,  $J = 7.3$  Hz, 1H), 7.11 - 7.03 (m, 2H), 3.90 (s, 3H);  $^{13}\text{C}$  NMR (101 MHz, Chloroform-*d*)  $\delta$  159.57, 150.90, 140.08, 133.47, 131.51, 130.36, 130.25, 129.28, 128.76, 128.32, 126.87, 124.96, 115.61, 114.91, 114.27, 111.95, 55.57; HRMS (EI-TOF) Calcd for  $\text{C}_{22}\text{H}_{16}\text{ClN}_2\text{O}$   $[\text{M}+\text{H}]^+$ : 359.0946; found: 359.0945.

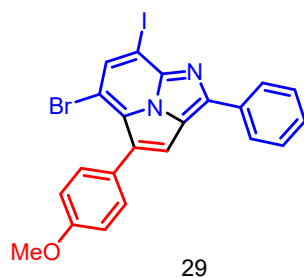

5-bromo-3-iodo-6-(4-methoxyphenyl)-1-phenylimidazo[5,1,2-*cd*]indolizine (**29**):

Yellow solid; Eluent: petroluem ether/ethyl acetate 250:1; 64.6 mg, 61%;

$^1\text{H}$  NMR (400 MHz, Chloroform-*d*)  $\delta$  8.38 (d,  $J = 6.9$  Hz, 2H), 8.31 (s, 1H), 7.65 (s, 1H), 7.62 (d,  $J = 8.6$  Hz, 2H), 7.54 (d,  $J = 14.5$  Hz, 2H), 7.49 (d,  $J = 5.9$  Hz, 1H), 7.02 (d,  $J = 1.8$  Hz, 2H), 3.90 (s, 3H);  $^{13}\text{C}$  NMR (101 MHz, Chloroform-*d*)  $\delta$  159.74, 150.86, 141.43, 138.90, 133.47, 133.24, 132.08, 130.50, 129.21, 128.86, 128.56, 126.59, 125.70, 118.73, 113.68, 108.04, 55.50; HRMS (EI-TOF) Calcd for  $\text{C}_{22}\text{H}_{15}\text{BrIN}_2\text{O}$   $[\text{M}+\text{H}]^+$ : 528.9407; found: 528.9406.

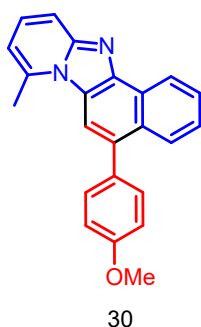

5-(4-methoxyphenyl)-8-methylnaphtho[1',2':4,5]imidazo[1,2-*a*]pyridine (**30**)

Brown solid; Eluent: petroluem ether/ethyl acetate 10:1; 43.4 mg, 64%;

$^1\text{H}$  NMR (400 MHz, Chloroform-*d*)  $\delta$  8.97 (d,  $J = 8.2$  Hz, 1H), 8.09 (s, 1H), 7.97 (d,  $J = 8.4$  Hz, 1H), 7.77 (d,  $J = 9.1$  Hz, 1H), 7.74 - 7.66 (m, 1H), 7.59 - 7.51 (m, 1H), 7.47 (d,  $J = 8.6$  Hz, 2H), 7.32 (dd,  $J = 9.2, 6.8$  Hz, 1H), 7.09 - 7.02 (m, 2H), 6.64 (d,  $J = 6.8$  Hz, 1H), 3.93 (s, 3H), 3.03 (s, 5H);  $^{13}\text{C}$  NMR (101 MHz, Chloroform-*d*)  $\delta$  159.07, 148.53, 141.14, 138.18, 133.96, 133.87, 131.57, 130.38, 127.92, 126.73, 126.66, 126.32, 126.18, 125.39, 123.51, 115.51, 115.07, 113.90, 112.12, 55.52, 21.63; HRMS (EI-TOF) Calcd for  $\text{C}_{23}\text{H}_{19}\text{N}_2\text{O}$   $[\text{M}+\text{H}]^+$ : 339.1492; found: 339.1492.

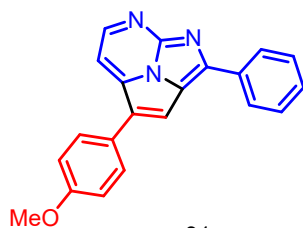

31

1-(4-methoxyphenyl)-3-phenyl-2a<sup>1,4,5</sup>-triazacyclopenta[*cd*]indene (**31**):

Orange solid; Eluent: petroluem ether/ethyl acetate 15:1; 33.5mg, 76.8%;

<sup>1</sup>H NMR (400 MHz, Chloroform-*d*) δ 8.88 (d, *J* = 5.4 Hz, 1H), 8.32 (d, *J* = 6.3 Hz, 2H), 7.83 (d, *J* = 5.4 Hz, 1H), 7.80 (s, 1H), 7.63 (d, *J* = 6.4 Hz, 2H), 7.53 - 7.42 (m, 3H), 6.99 - 6.92 (m, 2H), 3.83 (s, 3H); <sup>13</sup>C NMR (101 MHz, Chloroform-*d*) δ 159.47, 155.40, 148.00, 146.80, 133.69, 133.05, 131.14, 131.06, 129.11, 128.77, 128.22, 126.26, 123.26, 117.64, 114.76, 109.04, 55.45; HRMS (EI-TOF) Calcd for C<sub>21</sub>H<sub>16</sub>N<sub>3</sub>O [M+H]<sup>+</sup>: 326.1288; found: 326.1286.

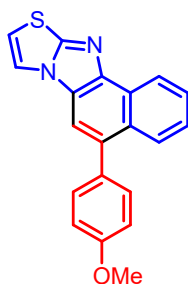

32

5-(4-methoxyphenyl)naphtho[1',2':4,5]imidazo[2,1-*b*]thiazole (**32**)

Brown solid; Eluent: petroluem ether/ethyl acetate 15:1; 59.5 mg, 90%;

<sup>1</sup>H NMR (400 MHz, Chloroform-*d*) δ 8.75 (d, *J* = 9.6 Hz, 1H), 7.97 (d, *J* = 8.4 Hz, 1H), 7.69 - 7.62 (m, 3H), 7.51 - 7.40 (m, 3H), 7.07 - 7.00 (m, 2H), 6.85 (d, *J* = 4.5 Hz, 1H), 3.90 (s, 3H); <sup>13</sup>C NMR (101 MHz, Chloroform-*d*) δ 159.07, 154.24, 143.39, 134.39, 133.38, 131.50, 129.65, 127.04, 126.85, 126.51, 125.16, 122.52, 117.44, 113.84, 111.74, 111.43, 55.48; HRMS (EI-TOF) Calcd for C<sub>20</sub>H<sub>15</sub>N<sub>2</sub>OS [M+H]<sup>+</sup>: 331.09; found: 331.0896.

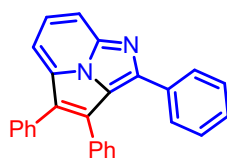

33

1,6,7-triphenylimidazo[5,1,2-*cd*]indolizine (**33**):<sup>4</sup>

Yellow solid; Eluent: petroluem ether/ethyl acetate 15:1; 37.1 mg, 50%;

<sup>1</sup>H NMR (400 MHz, Chloroform-*d*)  $\delta$  8.09 - 8.03 (m, 1H), 8.00 - 7.95 (m, 2H), 7.86 - 7.80 (m, 2H), 7.49 - 7.45 (m, 2H), 7.43 (dd,  $J = 8.0, 1.7$  Hz, 2H), 7.41 - 7.31 (m, 7H), 7.31 - 7.27 (m, 2H); <sup>13</sup>C NMR (101 MHz, Chloroform-*d*)  $\delta$  151.14, 134.13, 134.04, 133.73, 131.83, 131.75, 131.15, 130.31, 129.82, 129.51, 128.77, 128.65, 128.48, 128.30, 127.46, 127.17, 127.14, 112.91, 111.48.; HRMS (EI-TOF) Calcd for: C<sub>27</sub>H<sub>19</sub>N<sub>2</sub> [M+H]<sup>+</sup>: 371.1543; found: 371.1542.

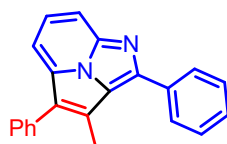

34

7-methyl-1,6-diphenylimidazo[5,1,2-*cd*]indolizine (**34**):<sup>4</sup>

Yellow solid; Eluent: petroluem ether/ethyl acetate 20:1; 35.6 mg, 58%;

<sup>1</sup>H NMR (400 MHz, Chloroform-*d*)  $\delta$  8.30 (d,  $J = 7.3$  Hz, 2H), 7.95 (d,  $J = 8.0$  Hz, 1H), 7.86 (t,  $J = 7.8$  Hz, 1H), 7.78 (d,  $J = 7.5$  Hz, 1H), 7.63 (d,  $J = 7.9$  Hz, 2H), 7.56 (dt,  $J = 11.5, 7.5$  Hz, 4H), 7.48 (t,  $J = 7.3$  Hz, 1H), 7.42 (t,  $J = 7.4$  Hz, 1H), 2.88 (s, 3H); <sup>13</sup>C NMR (101 MHz, Chloroform-*d*)  $\delta$  150.28, 139.80, 134.51, 134.15, 132.06, 130.08, 129.43, 129.18, 129.00, 128.92, 128.60, 127.48, 127.28, 126.74, 125.60, 111.36, 110.63, 14.06; HRMS (EI-TOF) Calcd for C<sub>22</sub>H<sub>17</sub>N<sub>2</sub> [M+H]<sup>+</sup>: 309.1386; found: 309.1389.

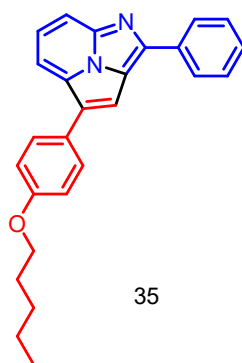

6-(4-(pentyloxy)phenyl)-1-phenylimidazo[5,1,2-*cd*]indolizine (**35**):

Yellow solid; Eluent: petroluem ether/ethyl acetate 25:1; 48.0 mg, 63%;

$^1\text{H}$  NMR (400 MHz, Chloroform-*d*)  $\delta$  8.38 (s, 2H), 8.07 (d,  $J = 7.6$  Hz, 1H), 8.00 (d,  $J = 8.0$  Hz, 1H), 7.90 (t,  $J = 7.8$  Hz, 1H), 7.86 (s, 1H), 7.81 – 7.74 (m, 2H), 7.56 (t,  $J = 7.6$  Hz, 2H), 7.46 (t,  $J = 7.4$  Hz, 1H), 7.08 - 7.01 (m, 2H), 4.03 (t,  $J = 6.6$  Hz, 2H), 1.90 - 1.80 (m, 2H), 1.55 - 1.36 (m, 4H), 0.97 (t,  $J = 7.1$  Hz, 3H);  $^{13}\text{C}$  NMR (101 MHz, Chloroform-*d*)  $\delta$  158.93, 149.33, 140.57, 134.13, 131.36, 130.88, 129.83, 129.18, 128.76, 128.22, 127.39, 126.85, 124.89, 115.36, 114.16, 113.58, 111.72, 68.29, 29.12, 28.36, 22.61, 14.17; HRMS (EI-TOF) Calcd for  $\text{C}_{26}\text{H}_{25}\text{N}_2\text{O}$   $[\text{M}+\text{H}]^+$ : 381.1961; found: 381.1960.

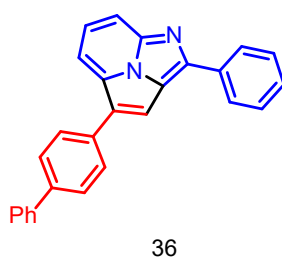

6-([1,1'-biphenyl]-4-yl)-1-phenylimidazo[5,1,2-*cd*]indolizine (**36**):

Yellow solid; Eluent: petroluem ether/ethyl acetate 15:1; 41.5 mg, 28%;

$^1\text{H}$  NMR (400 MHz, Chloroform-*d*)  $\delta$  8.42 (d,  $J = 7.3$  Hz, 2H), 8.18 (d,  $J = 7.6$  Hz, 1H), 8.07 - 8.01 (m, 2H), 7.97 (dd,  $J = 8.0, 4.2$  Hz, 3H), 7.77 (d,  $J = 8.3$  Hz, 2H), 7.69 (d,  $J = 7.0$  Hz, 2H), 7.59 (t,  $J = 7.6$  Hz, 2H), 7.50 (t,  $J = 7.5$  Hz, 3H), 7.40 (t,  $J = 7.4$  Hz, 1H);  $^{13}\text{C}$  NMR (101 MHz, Chloroform-*d*)  $\delta$  149.88, 140.67, 140.65, 140.35, 134.04, 133.95, 130.87, 130.82, 130.06, 129.26, 129.05, 128.32, 128.02, 127.98,

127.65, 127.25, 127.14, 124.99, 114.94, 113.86, 111.88; HRMS (EI-TOF) Calcd for  $C_{27}H_{19}N_2$   $[M+H]^+$ : 371.1543; found: 371.1534.

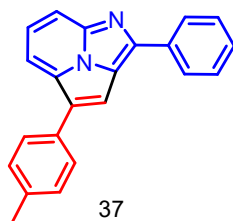

1-phenyl-6-(p-tolyl)imidazo[5,1,2-cd]indolizine (**37**):

Yellow solid; Eluent: petroleum ether/ethyl acetate 15:1; 32.1 mg, 52%;  $^1H$  NMR (400 MHz, Chloroform-*d*)  $\delta$  8.41 (d,  $J = 7.0$  Hz, 2H), 8.13 (d,  $J = 7.6$  Hz, 1H), 8.03 (d,  $J = 8.0$  Hz, 1H), 7.98 - 7.90 (m, 2H), 7.79 (d,  $J = 6.3$  Hz, 2H), 7.58 (t,  $J = 7.6$  Hz, 2H), 7.48 (t,  $J = 7.4$  Hz, 1H), 7.35 (d,  $J = 7.9$  Hz, 2H), 2.45 (s, 3H);  $^{13}C$  NMR (101 MHz, Chloroform-*d*)  $\delta$  149.61, 140.61, 137.48, 134.05, 132.15, 131.45, 130.88, 130.06, 129.94, 129.22, 128.26, 127.55, 127.02, 124.90, 114.69, 113.75, 111.78, 21.40; HRMS (EI-TOF) Calcd for  $C_{22}H_{17}N_2$   $[M+H]^+$ : 309.1386; found: 309.1388.

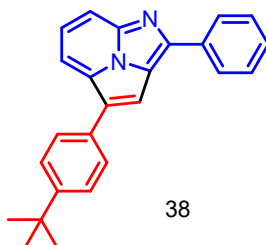

6-(4-(*tert*-butyl)phenyl)-1-phenylimidazo[5,1,2-*cd*]indolizine (**38**):

Yellow solid; Eluent: petroleum ether/ethyl acetate 15:1; 34.3 mg, 49%;  $^1H$  NMR (400 MHz, Chloroform-*d*)  $\delta$  8.41 (d,  $J = 7.0$  Hz, 2H), 8.14 (d,  $J = 7.6$  Hz, 1H), 8.03 (d,  $J = 8.0$  Hz, 1H), 7.98 - 7.90 (m, 2H), 7.87 - 7.80 (m, 2H), 7.67 - 7.54 (m, 4H), 7.54 - 7.44 (m, 1H), 1.42 (s, 9H);  $^{13}C$  NMR (101 MHz, Chloroform-*d*)  $\delta$  150.71, 149.57, 140.57, 134.03, 132.17, 131.36, 130.89, 129.93, 129.22, 128.26, 127.39, 127.03, 126.30, 124.90, 114.72, 113.78, 111.75, 34.81, 31.48; HRMS (EI-TOF) Calcd for  $C_{25}H_{23}N_2$   $[M+H]^+$ : 351.1856; found: 351.1858.

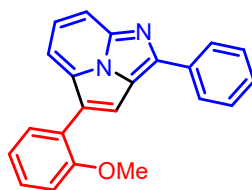

39

6-(2-methoxyphenyl)-1-phenylimidazo[5,1,2-*cd*]indolizine (**39**):

Light yellow oil; Eluent: petroleum ether/ethyl acetate 30:1; 34.4 mg, 53%;

$^1\text{H}$  NMR (400 MHz, Chloroform-*d*)  $\delta$  8.43 (dd,  $J = 7.0, 1.5$  Hz, 2H), 8.09 (s, 1H), 8.03 (dd,  $J = 7.8, 3.4$  Hz, 2H), 7.92 (t,  $J = 7.9$  Hz, 1H), 7.76 (dd,  $J = 7.5, 1.7$  Hz, 1H), 7.58 (t,  $J = 7.6$  Hz, 2H), 7.47 (t,  $J = 7.4$  Hz, 1H), 7.37 - 7.42 (m, 1H), 7.18 - 7.03 (m, 2H), 3.94 (s, 3H);  $^{13}\text{C}$  NMR (101 MHz, Chloroform-*d*)  $\delta$  156.70, 149.62, 140.61, 134.15, 131.79, 131.08, 129.83, 129.17, 128.95, 128.31, 127.43, 126.81, 125.03, 123.74, 121.23, 117.97, 114.45, 111.60, 111.39, 55.65; HRMS (EI-TOF) Calcd for  $\text{C}_{22}\text{H}_{17}\text{N}_2\text{O}$   $[\text{M}+\text{H}]^+$ : 325.1335; found: 325.1329.

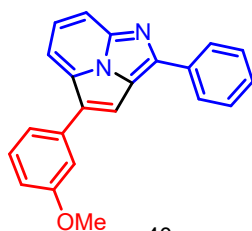

40

6-(3-methoxyphenyl)-1-phenylimidazo[5,1,2-*cd*]indolizine (**40**):

Light yellow oil; Eluent: petroleum ether/ethyl acetate 30:1; 37.7 mg, 58%;

$^1\text{H}$  NMR (400 MHz, Chloroform-*d*)  $\delta$  8.42 (d,  $J = 7.0$  Hz, 2H), 8.16 (d,  $J = 7.6$  Hz, 1H), 8.04 (d,  $J = 8.0$  Hz, 1H), 8.01 - 7.90 (m, 2H), 7.58 (t,  $J = 7.5$  Hz, 2H), 7.52 - 7.45 (m, 3H), 7.43 (t,  $J = 2.0$  Hz, 1H), 6.99 - 6.92 (m, 1H), 3.93 (s, 3H);  $^{13}\text{C}$  NMR (101 MHz, Chloroform-*d*)  $\delta$  160.41, 149.98, 140.69, 136.39, 133.98, 131.16, 130.83, 130.39, 130.05, 129.26, 128.31, 127.20, 124.88, 120.24, 115.20, 113.83, 113.51, 112.86, 111.86, 55.54; HRMS (EI-TOF) Calcd for  $\text{C}_{22}\text{H}_{17}\text{N}_2\text{O}$   $[\text{M}+\text{H}]^+$ : 325.1335; found: 325.1342.



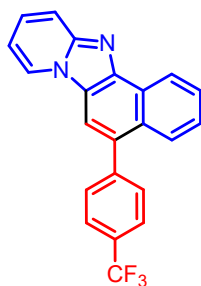

41

5-(4-(trifluoromethyl)phenyl)naphtho[1',2':4,5]imidazo[1,2-*a*]pyridine (**41**):

Brown solid; Eluent: petroluem ether/ethyl acetate 3:1; 37.0 mg, 51%;

<sup>1</sup>H NMR (400 MHz, Chloroform-*d*) δ 8.93 (d, *J* = 8.2 Hz, 1H), 8.45 (d, *J* = 6.8 Hz, 1H), 7.88 (t, *J* = 9.0 Hz, 2H), 7.82 - 7.75 (m, 3H), 7.72 (t, *J* = 7.7 Hz, 1H), 7.66 (d, *J* = 7.9 Hz, 2H), 7.58 - 7.47 (m, 1H), 7.47 - 7.38 (m, 1H), 6.93 (t, *J* = 6.7 Hz, 1H); <sup>13</sup>C NMR (101 MHz, Chloroform-*d*) δ 147.65, 144.89, 141.12, 133.46, 130.85, 130.34, 129.82, 129.50, 128.11, 127.02, 126.89, 126.64, 126.43, 125.80, 125.43 (q, *J* = 3.1 Hz), 124.49, 123.82, 123.52, 123.09, 118.09, 111.68, 111.27; <sup>19</sup>F NMR (376 MHz, Chloroform-*d*) δ -62.30; HRMS (EI-TOF) Calcd for C<sub>22</sub>H<sub>14</sub>F<sub>3</sub>N<sub>2</sub> [M+H]<sup>+</sup>: 363.1104; found: 363.1117.

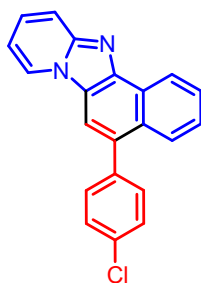

42

5-(4-chlorophenyl)naphtho[1',2':4,5]imidazo[1,2-*a*]pyridine (**42**):

Brown solid; Eluent: petroluem ether/ethyl acetate 3:1; 46.7 mg, 71%;

<sup>1</sup>H NMR (400 MHz, Chloroform-*d*) δ 8.93 (dd, *J* = 8.1, 1.6 Hz, 1H), 8.47 (d, *J* = 6.9 Hz, 1H), 7.93 (d, *J* = 9.4 Hz, 1H), 7.87 (d, *J* = 9.2 Hz, 1H), 7.80 (s, 1H), 7.72 (t, *J* = 7.0 Hz, 1H), 7.54 (ddd, *J* = 8.4, 6.9, 1.4 Hz, 1H), 7.48 (d, *J* = 1.0 Hz, 4H), 7.47 - 7.39 (m, 1H), 6.93 (t, *J* = 6.8 Hz, 1H); <sup>13</sup>C NMR (101 MHz, Chloroform-*d*) δ 147.57, 141.04, 139.61, 133.77, 133.57, 131.80, 130.61, 128.68, 127.95, 127.09, 126.85, 126.80, 126.31, 124.51, 123.91, 123.47, 118.14, 111.59, 111.12; HRMS (EI-TOF) Calcd for C<sub>21</sub>H<sub>14</sub>ClN<sub>2</sub> [M+H]<sup>+</sup>: 329.084; found: 329.0847.

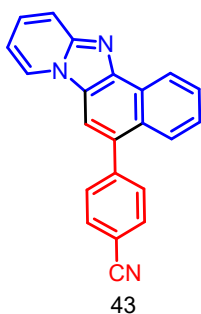

4-(naphtho[1',2':4,5]imidazo[1,2-*a*]pyridin-5-yl)benzonitrile (**43**):

Green solid; Eluent: petroluem ether/ethyl acetate 5:1; 49.8 mg, 78%; <sup>1</sup>H NMR (400 MHz, Chloroform-*d*) δ 8.92 (d, *J* = 8.2 Hz, 1H), 8.49 (d, *J* = 6.8 Hz, 1H), 7.86 (d, *J* = 7.7 Hz, 2H), 7.82 (d, *J* = 4.5 Hz, 3H), 7.72 (t, *J* = 7.5 Hz, 1H), 7.67 (d, *J* = 7.9 Hz, 2H), 7.55 (t, *J* = 7.7 Hz, 1H), 7.50 - 7.41 (m, 1H), 6.96 (d, *J* = 13.6 Hz, 1H); <sup>13</sup>C NMR (101 MHz, Chloroform-*d*) δ 147.81, 146.08, 141.42, 132.80, 132.29, 131.26, 129.97, 128.27, 127.06, 126.99, 126.57, 126.33, 124.55, 123.81, 123.58, 119.04, 118.16, 111.77, 111.43, 111.21; HRMS (EI-TOF) Calcd for C<sub>22</sub>H<sub>14</sub>N<sub>3</sub> [M+H]<sup>+</sup>: 320.1182; found: 320.1185.

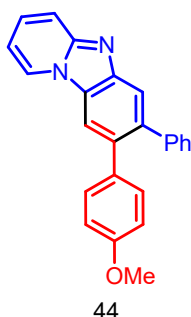

8-(4-methoxyphenyl)-7-phenylbenzo[4,5]imidazo[1,2-*a*]pyridine (**44**):

Colourless solid; Eluent: petroluem ether/ethyl acetate 3:1; 65.2 mg, 93%; <sup>1</sup>H NMR (400 MHz, Chloroform-*d*) δ 8.44 (d, *J* = 6.9 Hz, 1H), 7.96 (s, 1H), 7.87 (s, 1H), 7.72 (d, *J* = 9.3 Hz, 1H), 7.47 - 7.38 (m, 1H), 7.29 - 7.18 (m, 5H), 7.14 - 7.07 (m, 2H), 6.85 (t, *J* = 6.2 Hz, 1H), 6.82 - 6.74 (m, 2H), 3.78 (s, 3H); <sup>13</sup>C NMR (101 MHz, Chloroform-*d*) δ 158.39, 149.19, 143.58, 142.12, 139.53, 134.65, 134.37, 131.38, 130.38, 129.66, 128.31, 128.00, 126.49, 125.36, 121.21, 118.03, 113.49, 111.98, 110.72, 55.30; HRMS (EI-TOF) Calcd for C<sub>24</sub>H<sub>19</sub>N<sub>2</sub>O [M+H]<sup>+</sup>: 351.1492; found: 351.1490.

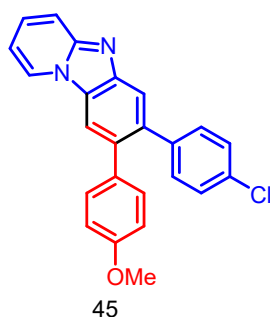

7-(4-chlorophenyl)-8-(4-methoxyphenyl)benzo[4,5]imidazo[1,2-*a*]pyridine (**45**):

Colourless solid; Eluent: petroleum ether/ethyl acetate 3:1; 63.9 mg, 83%;

$^1\text{H}$  NMR (400 MHz, Chloroform-*d*)  $\delta$  8.45 (d,  $J = 6.9$  Hz, 1H), 7.89 (d,  $J = 13.8$  Hz, 2H), 7.73 (d,  $J = 9.3$  Hz, 1H), 7.50 - 7.41 (m, 1H), 7.26 - 7.19 (m, 2H), 7.15 (d,  $J = 6.6$  Hz, 2H), 7.12 - 7.07 (m, 2H), 6.92 - 6.84 (m, 1H), 6.84 - 6.77 (m, 2H), 3.81 (s, 3H);  $^{13}\text{C}$  NMR (101 MHz, Chloroform-*d*)  $\delta$  158.54, 149.45, 143.89, 140.70, 138.15, 134.48, 134.09, 132.62, 131.66, 131.42, 129.71, 128.57, 128.25, 125.38, 121.25, 118.23, 113.68, 112.14, 110.77, 55.37; HRMS (EI-TOF) Calcd for  $\text{C}_{24}\text{H}_{18}\text{ClN}_2\text{O}$   $[\text{M}+\text{H}]^+$ : 385.1102; found: 385.1096.

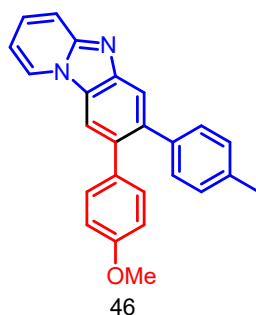

8-(4-methoxyphenyl)-7-(*p*-tolyl)benzo[4,5]imidazo[1,2-*a*]pyridine (**46**):

Colourless solid; Eluent: petroleum ether/ethyl acetate 3:1; 69.2 mg, 95%;

$^1\text{H}$  NMR (400 MHz, Chloroform-*d*)  $\delta$  8.43 (d,  $J = 6.9$  Hz, 1H), 7.94 (s, 1H), 7.85 (s, 1H), 7.71 (d,  $J = 9.2$  Hz, 1H), 7.46 - 7.38 (m, 1H), 7.12 (dd,  $J = 8.5, 2.7$  Hz, 4H), 7.06 (d,  $J = 7.9$  Hz, 2H), 6.85 (t,  $J = 6.7$  Hz, 1H), 6.85 - 6.76 (m, 2H), 3.82 (s, 3H), 2.33 (s, 3H);  $^{13}\text{C}$  NMR (101 MHz, Chloroform-*d*)  $\delta$  158.36, 149.23, 143.77, 139.48, 139.20, 136.08, 134.65, 134.60, 131.37, 130.23, 129.53, 128.76, 128.24, 125.34, 121.23, 118.09, 113.50, 111.96, 110.62, 55.32, 21.23; HRMS (EI-TOF) Calcd for  $\text{C}_{25}\text{H}_{21}\text{N}_2\text{O}$   $[\text{M}+\text{H}]^+$ : 365.1648; found: 365.1643.

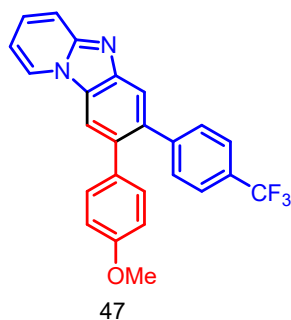

8-(4-methoxyphenyl)-7-(4-(trifluoromethyl)phenyl)benzo[4,5]imidazo[1,2-*a*]pyridine  
(47):

Colourless solid; Eluent: petroluem ether/ethyl acetate 3:1; 45.3 mg, 55%;

<sup>1</sup>H NMR (400 MHz, Chloroform-*d*) δ 8.48 (d, *J* = 6.8 Hz, 1H), 7.93 (d, *J* = 16.2 Hz, 2H), 7.77 (d, *J* = 9.2 Hz, 1H), 7.50 (t, *J* = 6.4 Hz, 3H), 7.33 (d, *J* = 8.0 Hz, 2H), 7.12 - 7.05 (m, 2H), 6.91 (t, *J* = 6.7 Hz, 1H), 6.83 - 6.77 (m, 2H), 3.80 (s, 3H); <sup>13</sup>C NMR (101 MHz, Chloroform-*d*) δ 158.66, 149.27, 145.84, 143.26, 138.10, 134.64, 133.71, 132.04, 131.42, 130.62, 130.17, 128.81, 128.65, 128.49, 125.80, 125.44, 125.00 (q, *J* = 4.1 Hz), 123.10, 121.23, 118.09, 113.74, 112.33, 111.13, 55.36; <sup>19</sup>F NMR (376 MHz, Chloroform-*d*) δ -62.29; HRMS (EI-TOF) Calcd for C<sub>25</sub>H<sub>18</sub>F<sub>3</sub>N<sub>2</sub>O [M+H]<sup>+</sup>: 419.1366; found: 419.1355.

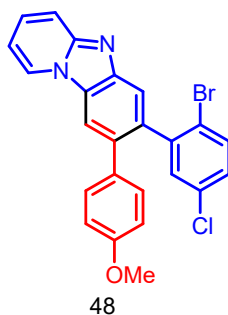

7-(2-bromo-5-chlorophenyl)-8-(4-methoxyphenyl)benzo[4,5]imidazo[1,2-*a*]pyridine  
(48):

Colourless solid; Eluent: petroluem ether/ethyl acetate 3:1; 39.0 mg, 42%;

<sup>1</sup>H NMR (400 MHz, Chloroform-*d*) δ 8.47 (d, *J* = 6.9 Hz, 1H), 7.90 (s, 1H), 7.82 (s, 1H), 7.74 (d, *J* = 9.3 Hz, 1H), 7.45 (dd, *J* = 15.9, 7.6 Hz, 2H), 7.24 (d, *J* = 2.6 Hz, 1H), 7.18 - 7.11 (m, 2H), 7.09 (dd, *J* = 8.6, 2.6 Hz, 1H), 6.88 (t, *J* = 6.8 Hz, 1H), 6.81 - 6.75 (m, 2H), 3.79 (s, 3H); <sup>13</sup>C NMR (101 MHz, Chloroform-*d*) δ 158.60, 149.56,

144.53, 143.28, 137.21, 134.91, 133.68, 133.48, 132.82, 132.30, 131.10, 129.85, 128.99, 128.75, 125.42, 122.42, 121.47, 118.31, 113.48, 111.76, 110.83, 55.32; HRMS (EI-TOF) Calcd for C<sub>24</sub>H<sub>17</sub>BrClN<sub>2</sub>O [M+H]<sup>+</sup>: 463.0207; found: 463.0189.

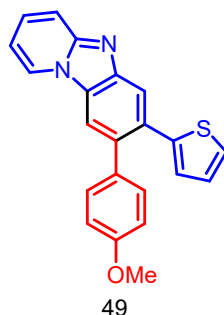

8-(4-methoxyphenyl)-7-(thiophen-2-yl)benzo[4,5]imidazo[1,2-a]pyridine (**49**):

Colourless solid; Eluent: petroleum ether/ethyl acetate 3:1; 42.1 mg, 59%;

<sup>1</sup>H NMR (400 MHz, Chloroform-*d*) δ 8.40 (d, *J* = 6.9 Hz, 1H), 8.08 (s, 1H), 7.82 (s, 1H), 7.70 (d, *J* = 9.2 Hz, 1H), 7.46 - 7.38 (m, 1H), 7.25 - 7.17 (m, 3H), 6.91 (dd, *J* = 5.1, 3.5 Hz, 1H), 6.89 - 6.81 (m, 3H), 6.79 (dd, *J* = 3.6, 1.2 Hz, 1H), 3.83 (s, 3H); <sup>13</sup>C NMR (101 MHz, Chloroform-*d*) δ 158.86, 149.44, 143.96, 143.73, 134.87, 134.29, 131.95, 131.24, 129.71, 128.52, 127.27, 127.00, 125.78, 125.35, 121.43, 118.15, 113.59, 112.26, 110.75, 55.36; HRMS (EI-TOF) Calcd for C<sub>22</sub>H<sub>17</sub>N<sub>2</sub>OS [M+H]<sup>+</sup>: 357.1056; found: 357.1050.

## 9、 Reference

1. Nipate, D. S., Sonam., Shinde, V. N., Rangan, K. & Kumar, A. Tempo-mediated synthesis of indolyl/imidazo 1,2-a pyridinyl-substituted para-quinone methides from butylated hydroxytoluene. *J. Org. Chem.* **2021**, *86* (23), 17090-17100.
2. Mohan, D. C., Rao, S. N., Ravi, C. & Adimurthy, S. Copper(I) iodide catalyzed aerobic oxidative C-N and C-S bond formations through C-H activation: Synthesis of functionalized imidazo 1,2-a pyridines. *J. Org. Chem.* **2014**, *3* (5), 609-613.
3. Hao, H.-Y., Mao, Y.-J., Xu, Z.-Y., Lou, S.-J. & Xu, D.-Q. Selective cross-dehydrogenative C(sp<sup>3</sup>)-H arylation with arenes. *Org. Lett.* **2020**, *22* (6), 2396-2402.
4. Meena, N., Sharma, S., Bhatt, R., Shinde, V. N., Sunda, A. P., Bhuvanesh, N., Kumar, A. & Joshi, H. A selenium-coordinated palladium(ii)trans-dichloride molecular rotor as a catalyst for site-selective annulation of 2-arylimidazo 1,2-a pyridines. *Chem. Commun.* **2020**, *56* (70), 10223-10226.







6-(4-methoxyphenyl)-1-(p-tolyl)imidazo[5,1,2-cd]indolizine (5):

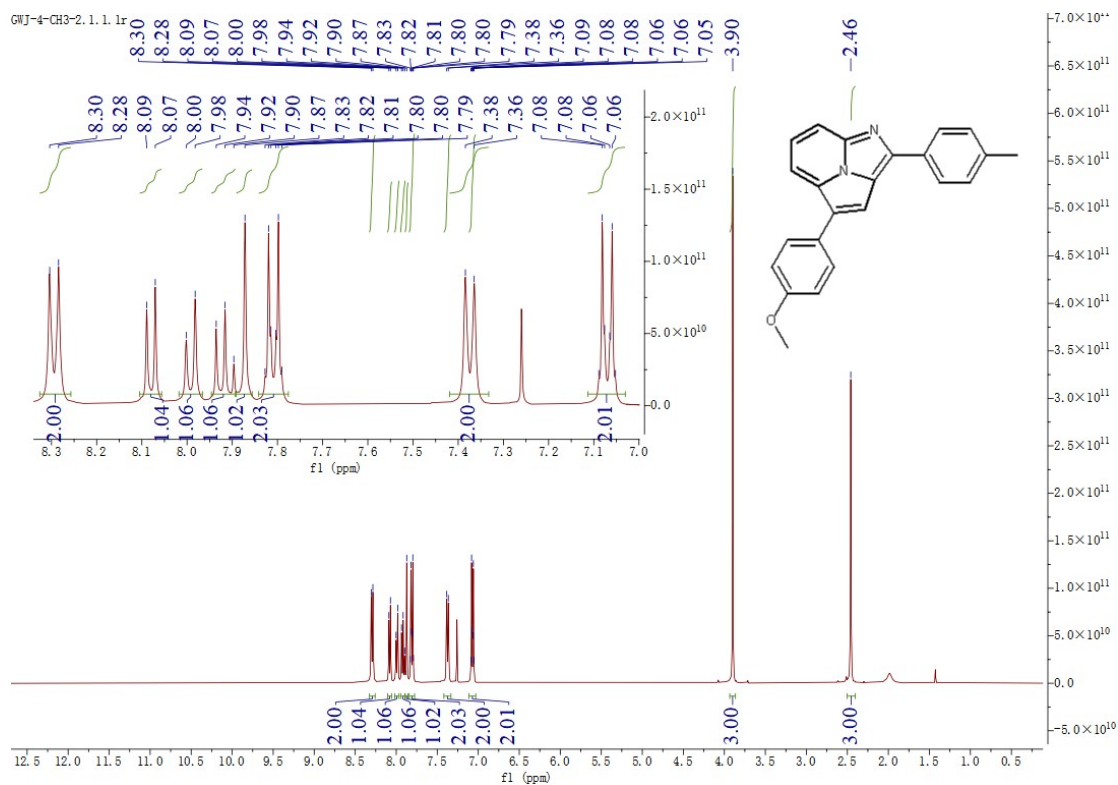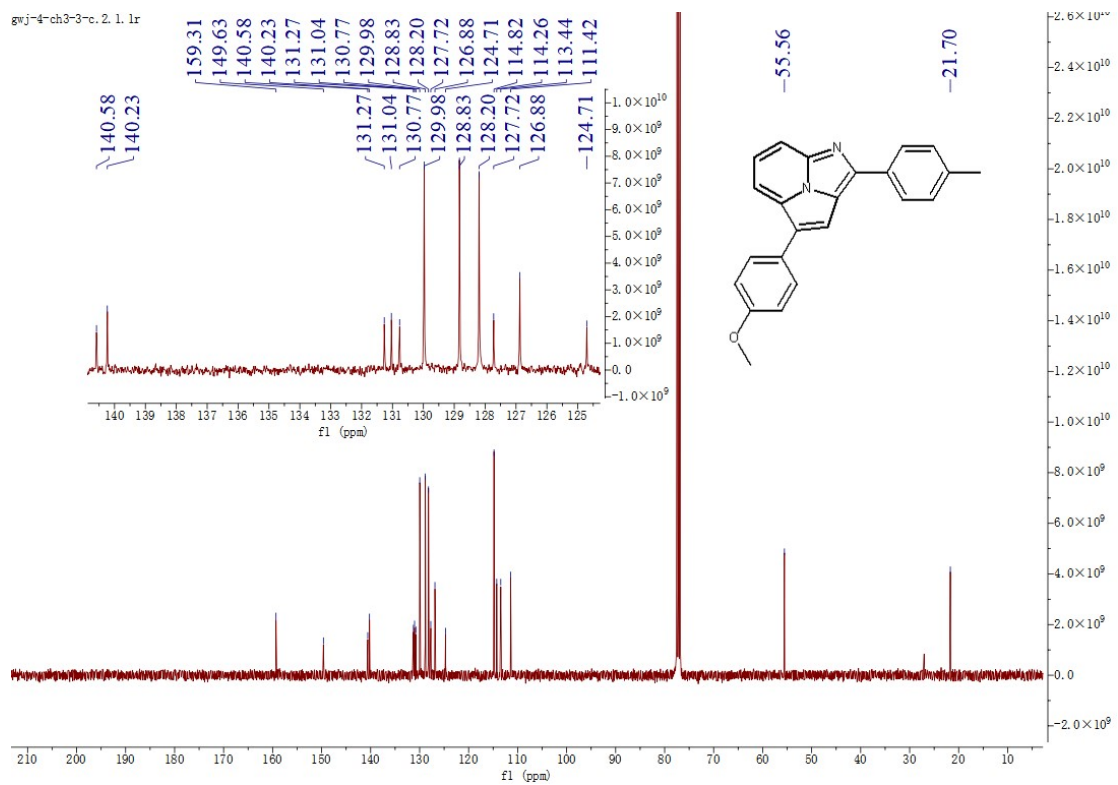



GWJ-4-F-F.3.1.1r

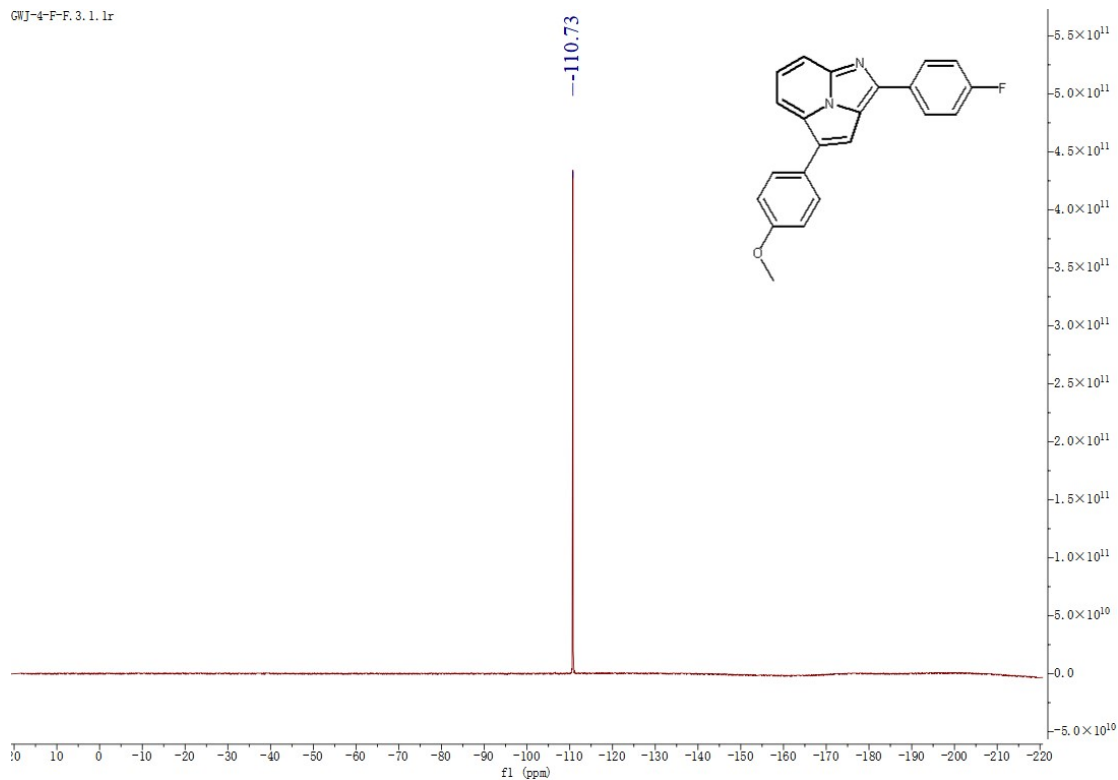

1-(4-chlorophenyl)-6-(4-methoxyphenyl)imidazo[5,1,2-cd]indolizine (7):

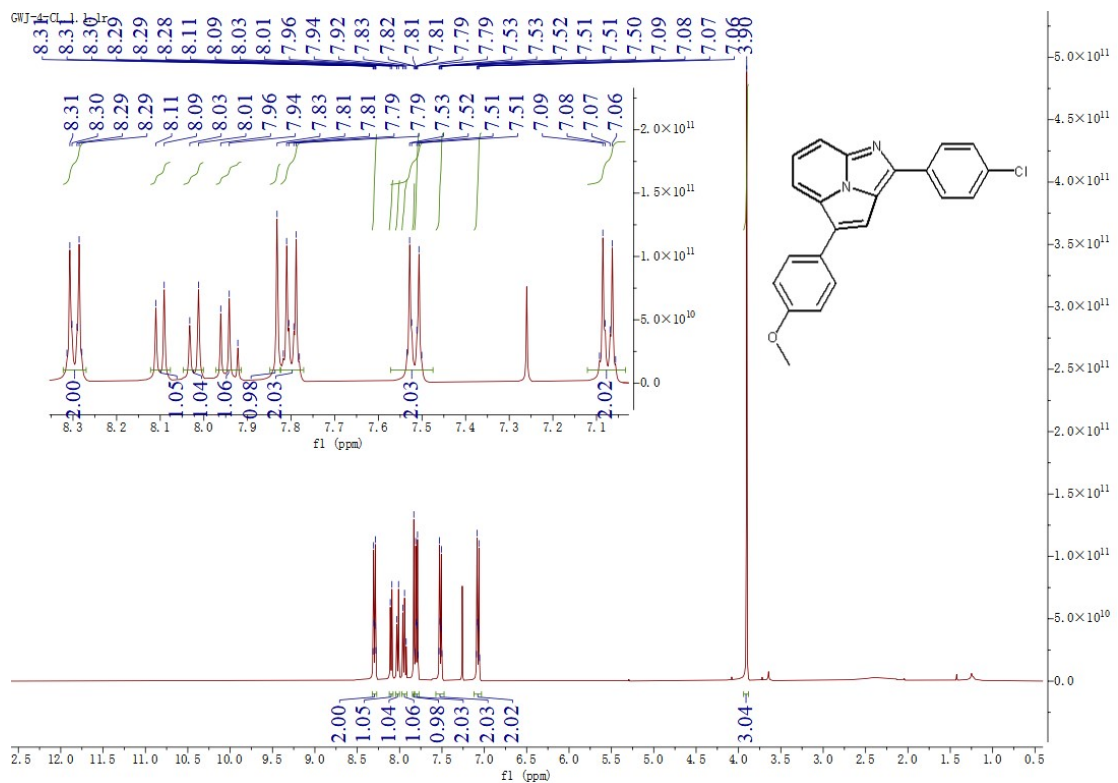

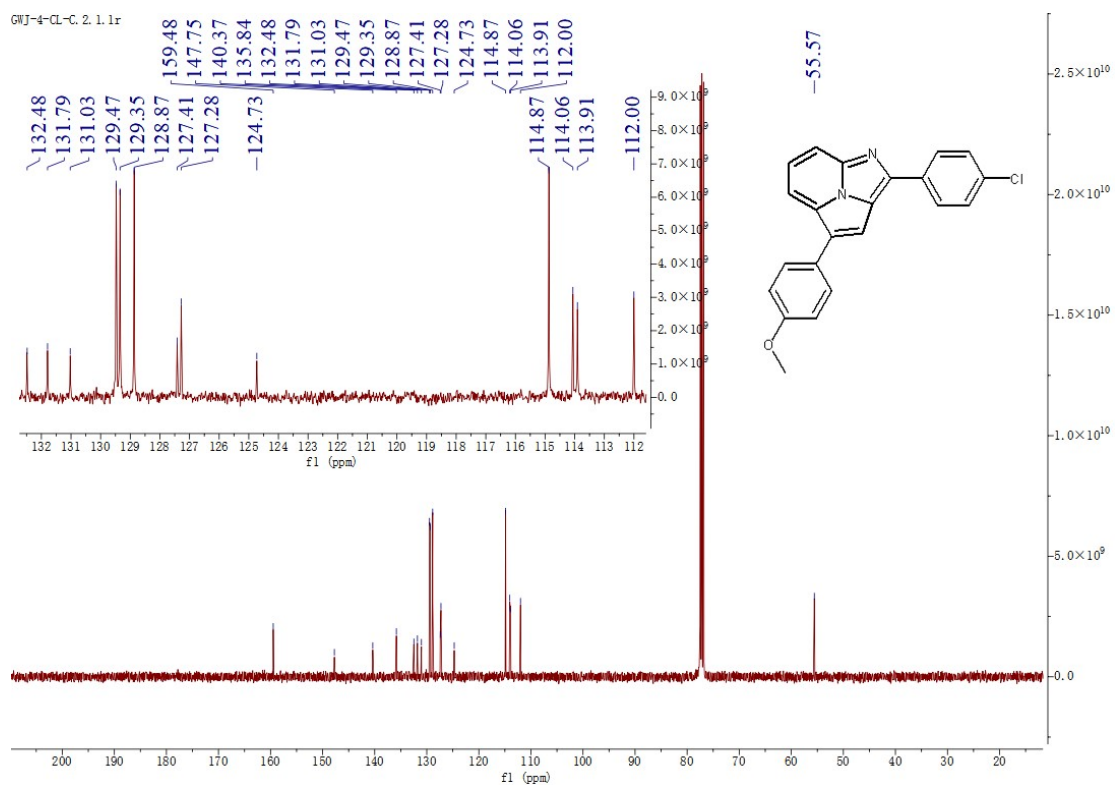

1-(4-bromophenyl)-6-(4-methoxyphenyl)imidazo[5,1,2-cd]indolizine (8):

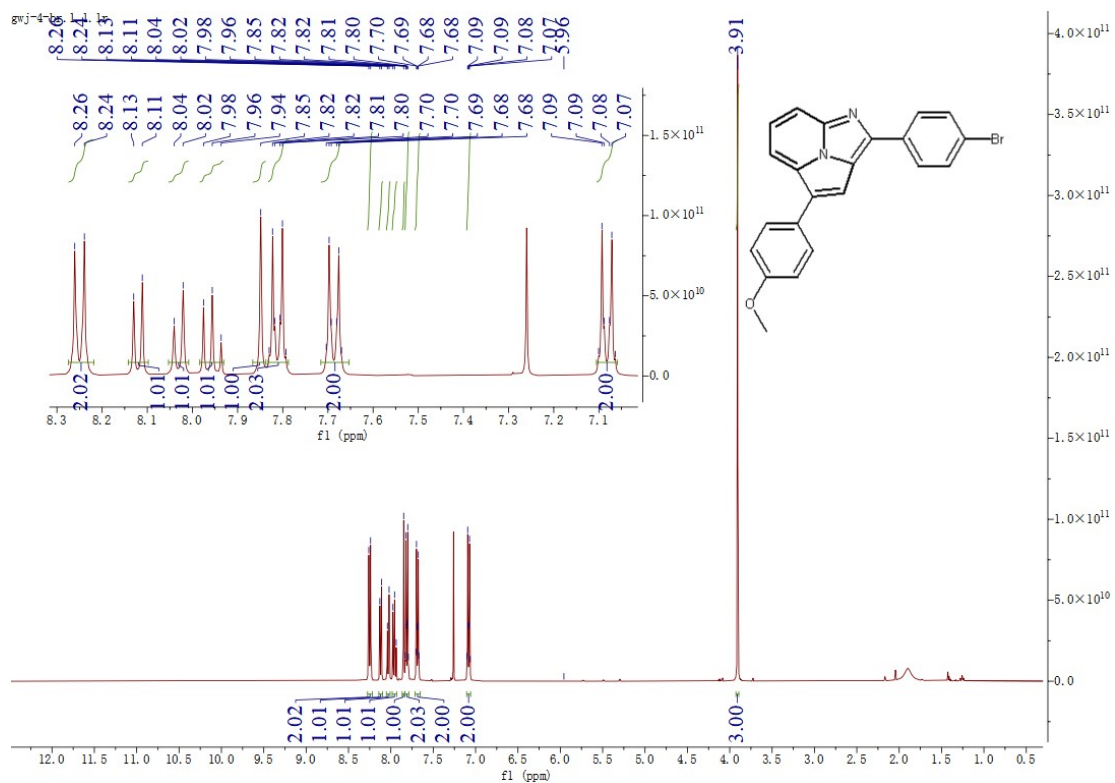





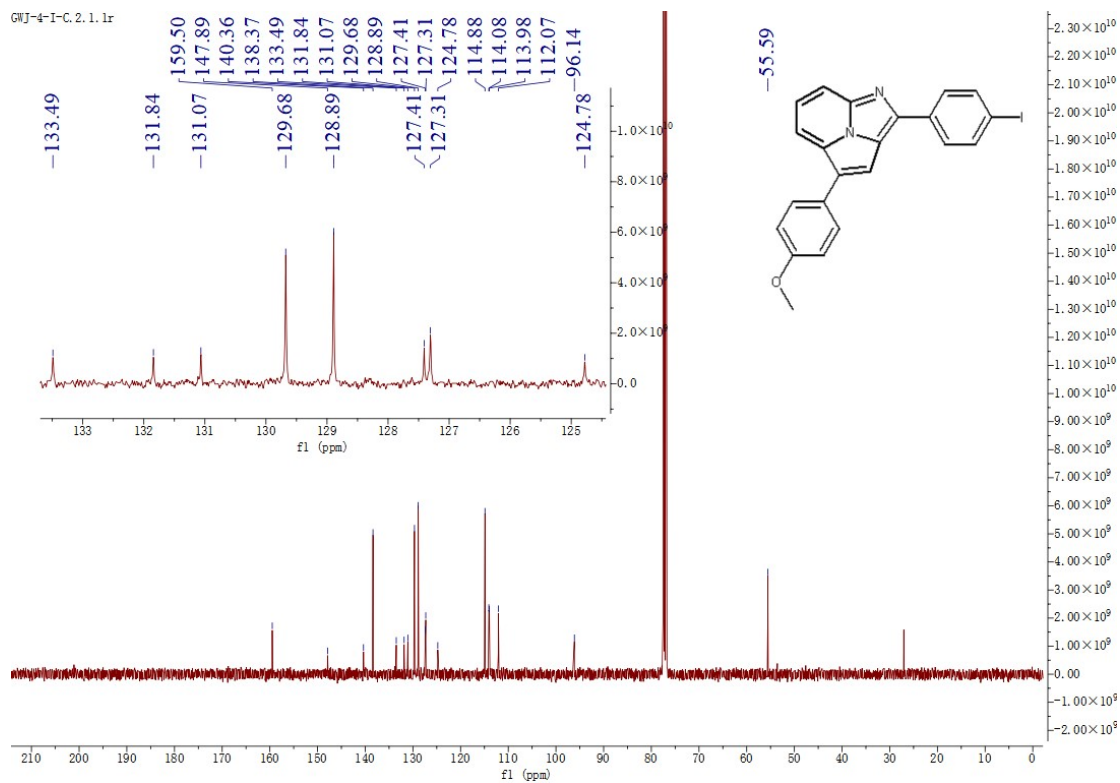

1-([1,1'-biphenyl]-4-yl)-6-(4-methoxyphenyl)imidazo[5,1,2-*cd*]indolizine (**10**):

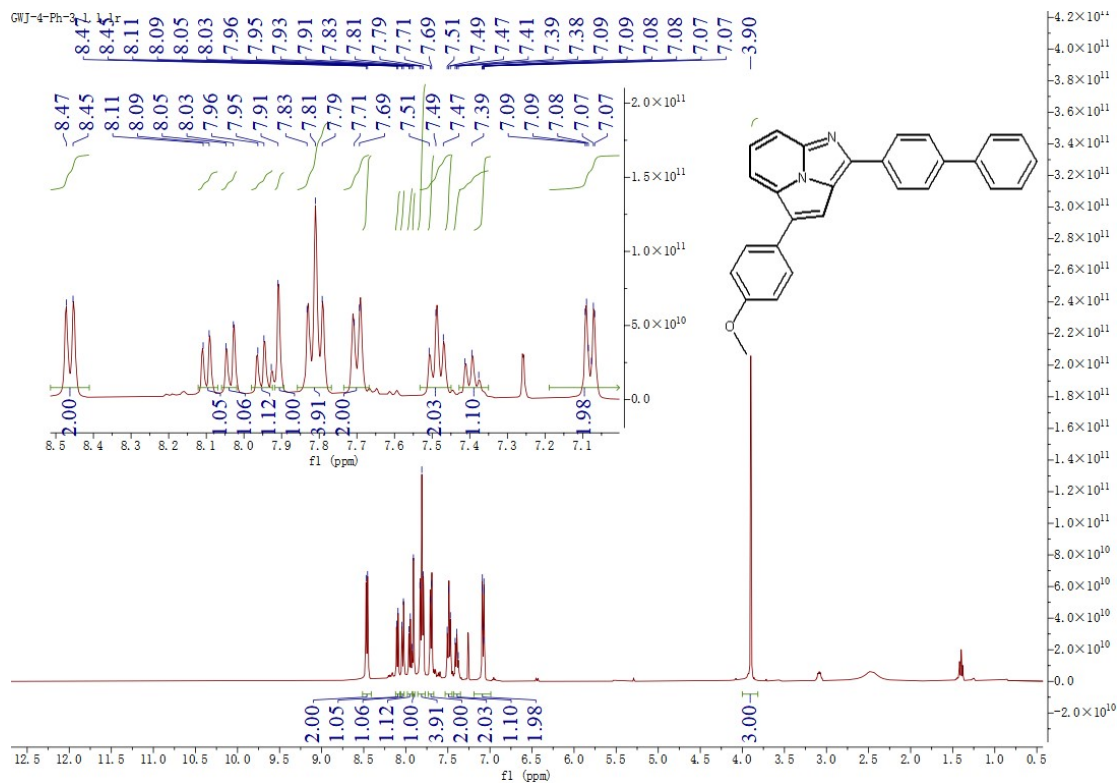

gwj-4-Ph-3-c. 2.1.1r

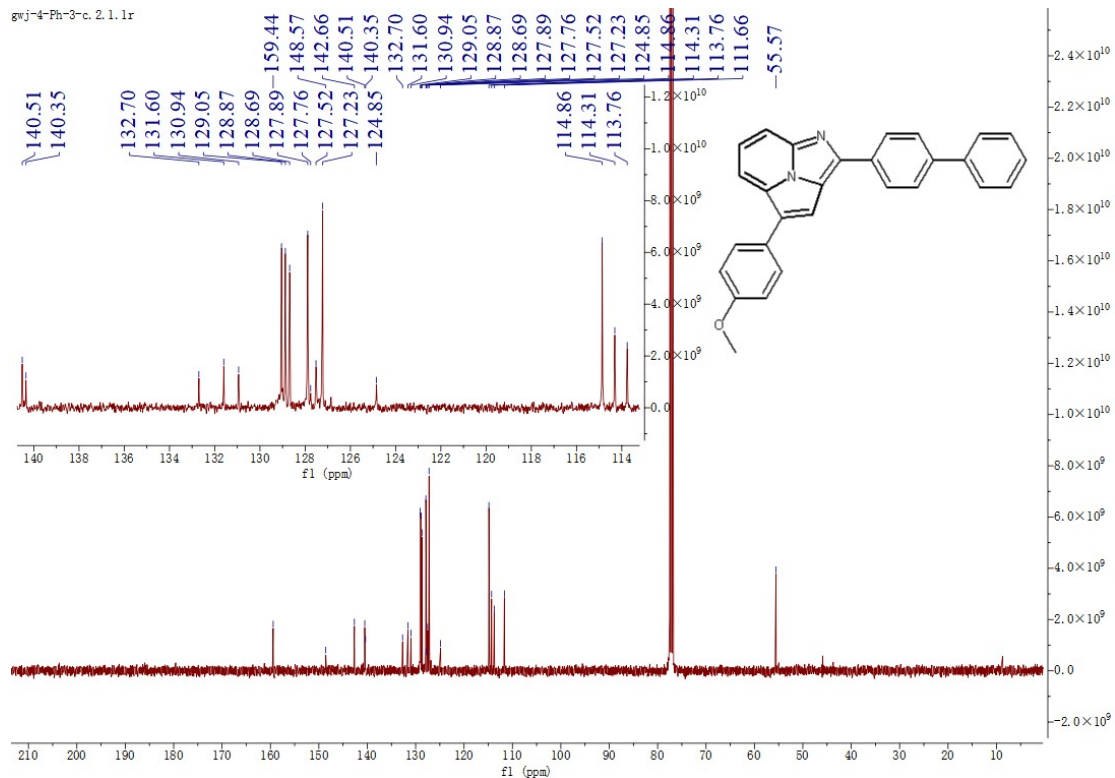

6-(4-methoxyphenyl)-1-(4-(trifluoromethyl)phenyl)imidazo[5,1,2-cd]indolizine (**11**):

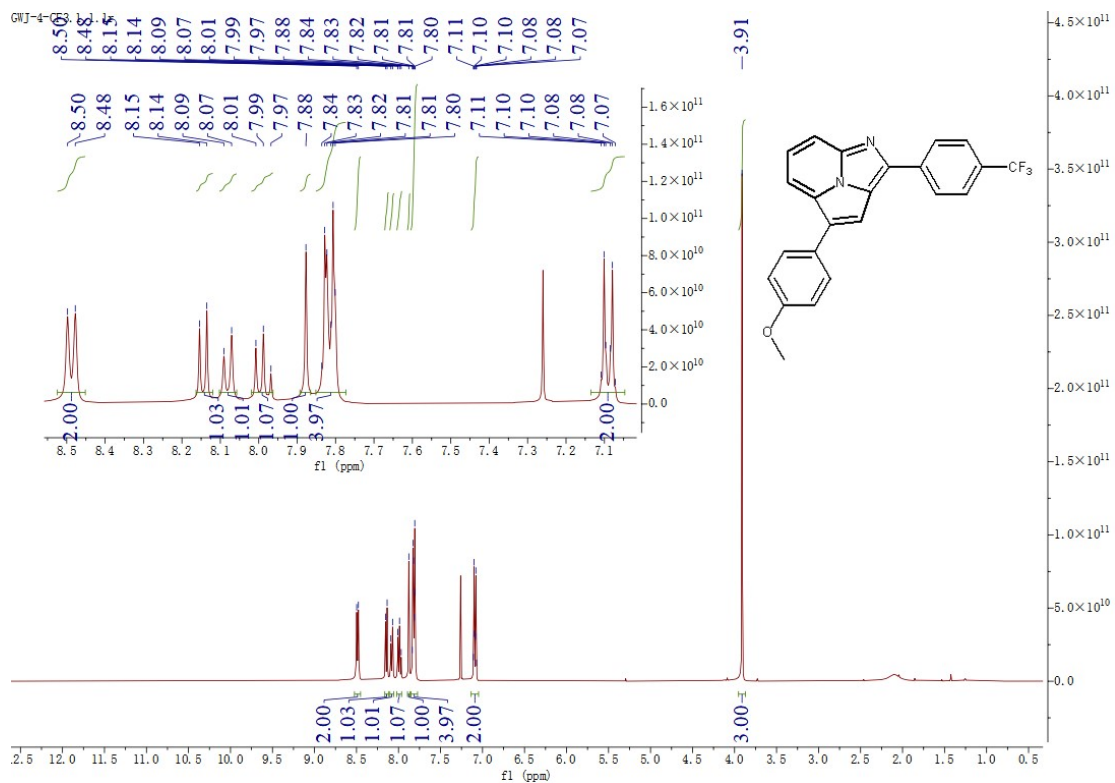

GWJ-4-CF3-C. 2. 1. 1r

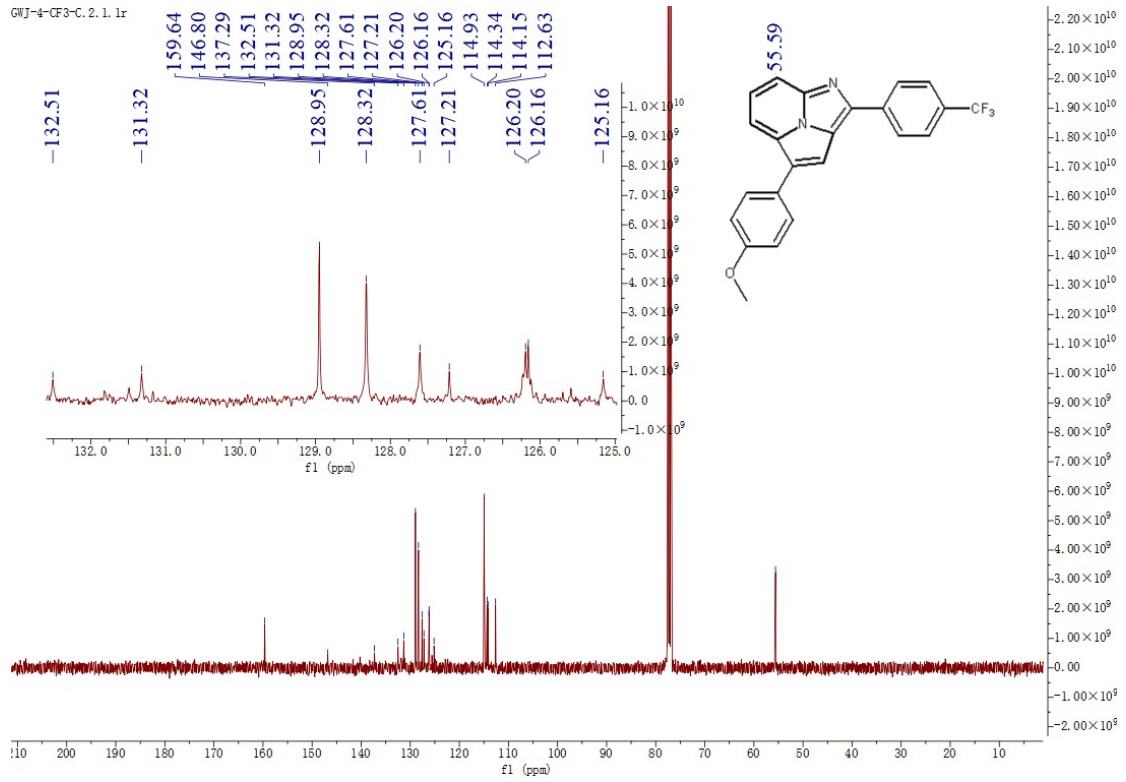

GWJ-4-CF3-F. 3. 1. 1r

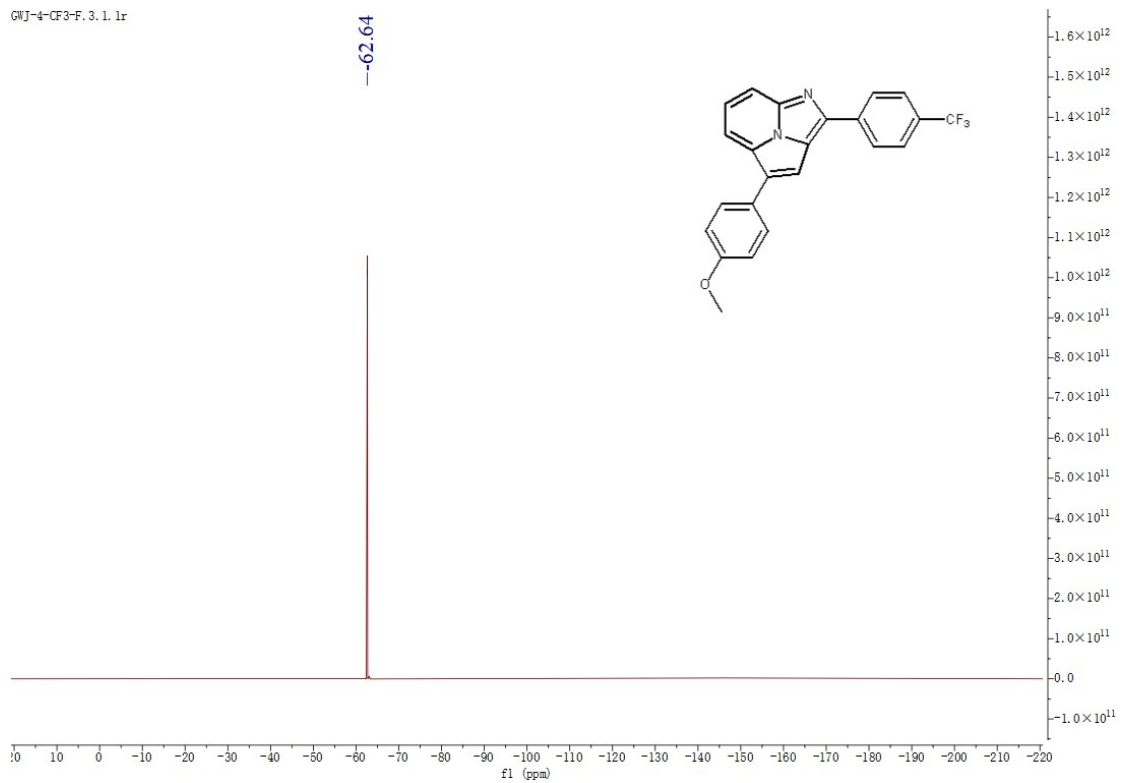



3-methoxy-5-(4-methoxyphenyl)naphtho[1',2':4,5]imidazo[1,2-a]pyridine (**12**):

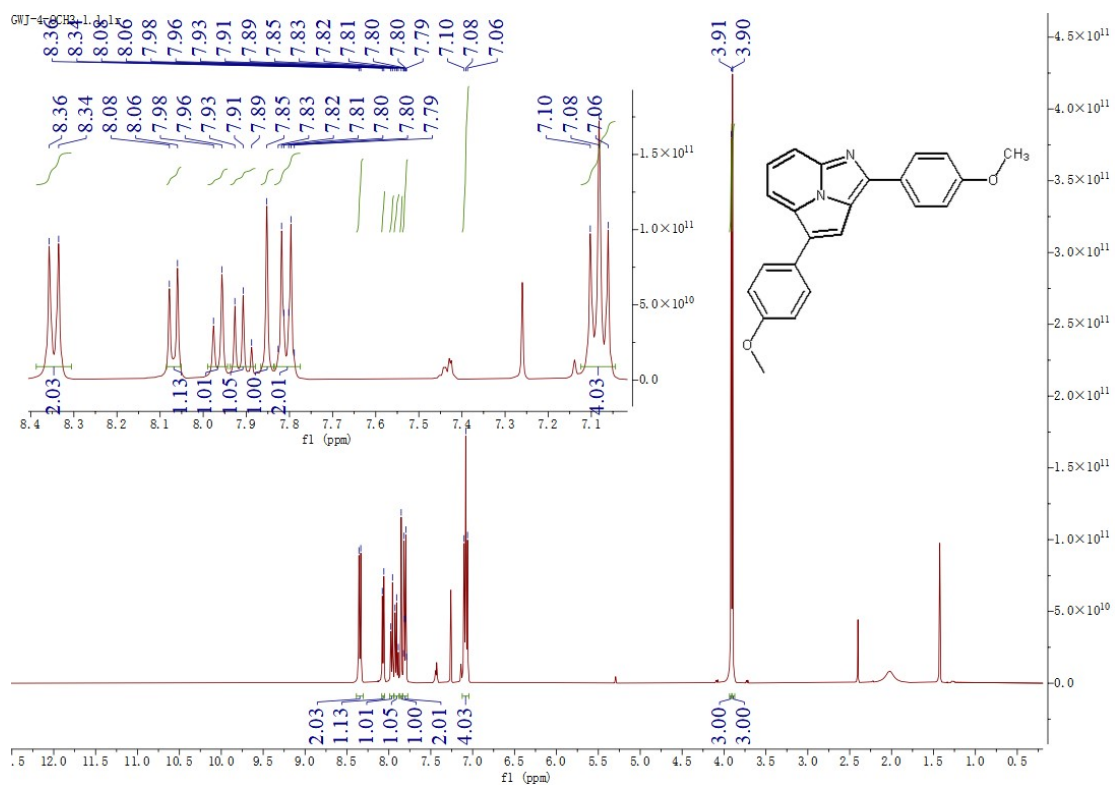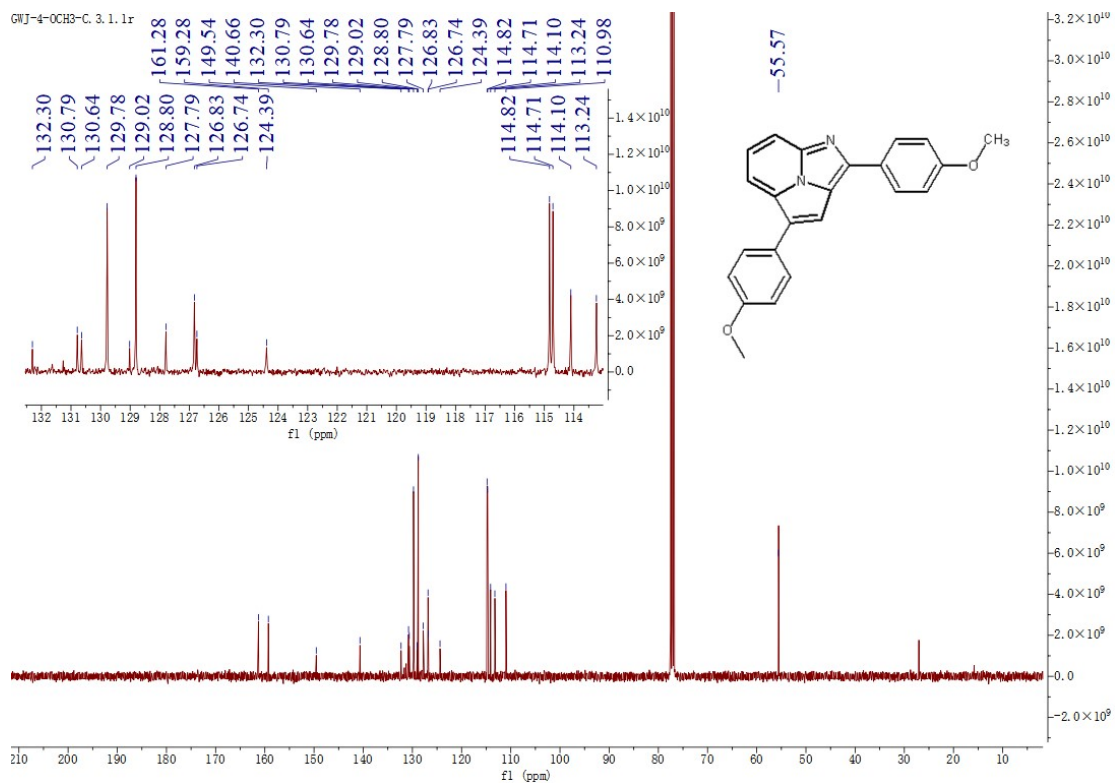

6-(4-methoxyphenyl)-1-(4-(trifluoromethoxy)phenyl)imidazo[5,1,2-cd]indolizine (**13**):

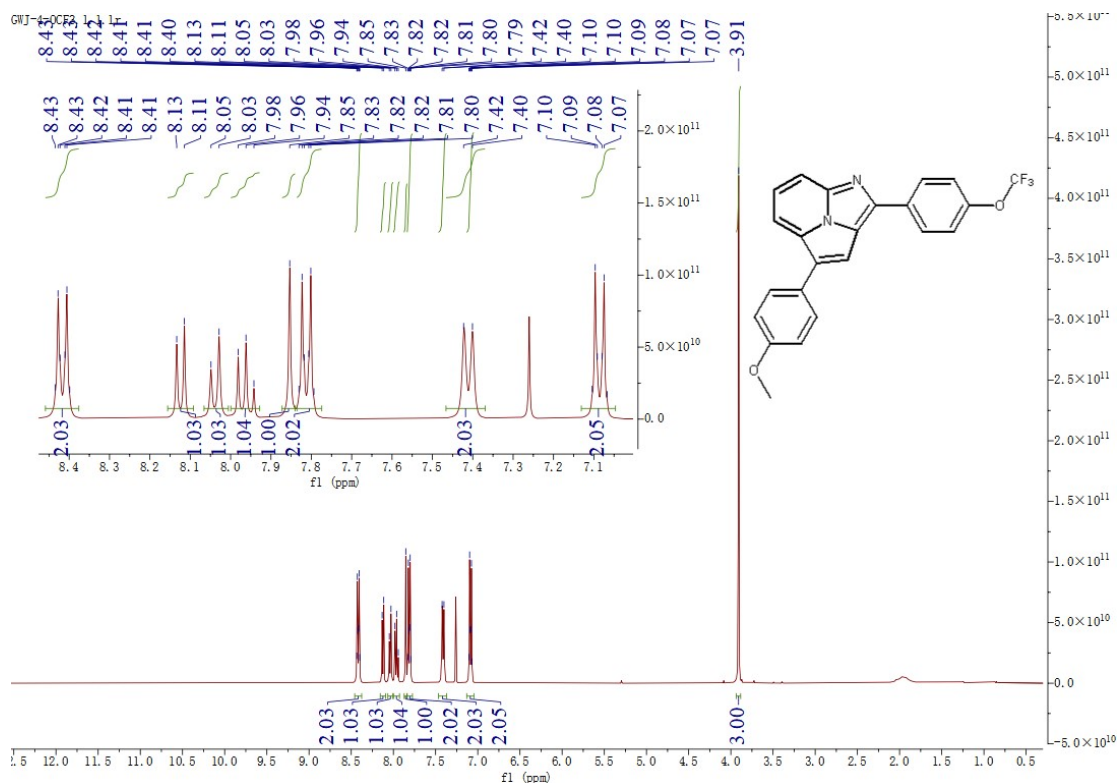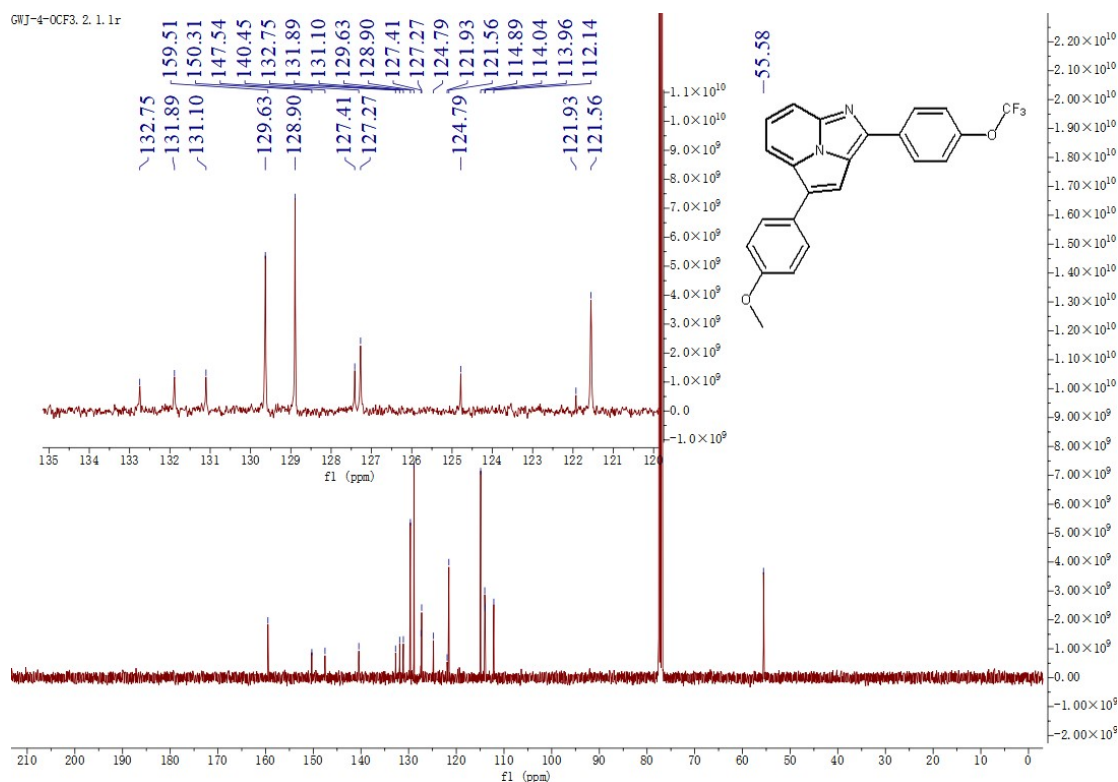

GWJ-40CF3-F. 3. 1. 1r

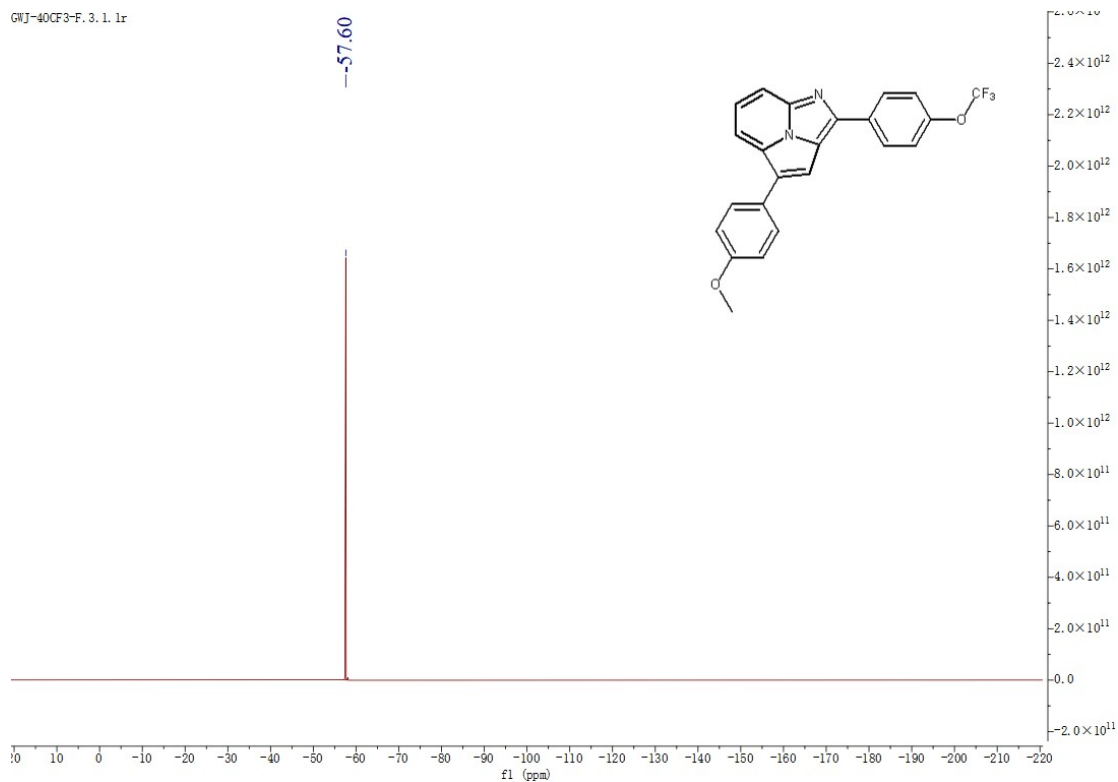

methyl 4-(6-(4-methoxyphenyl)imidazo[5,1,2-cd]indolizin-1-yl)benzoate (**14**):

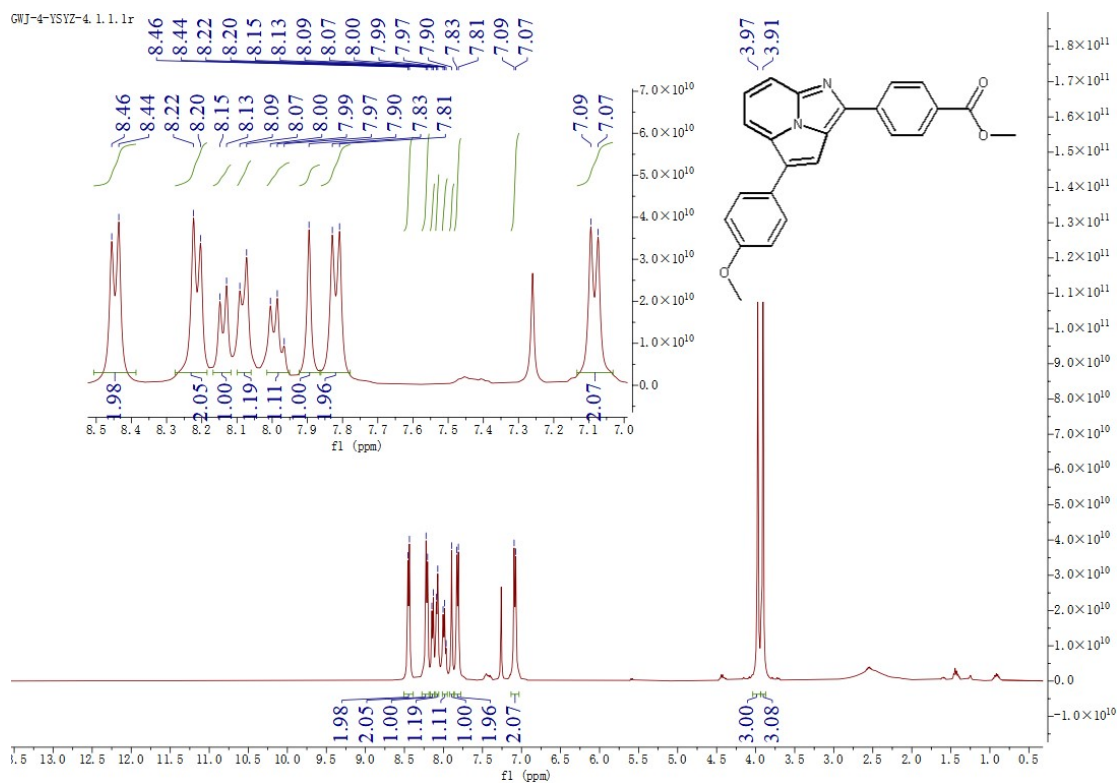



GWJ-4-CN-2C. 2. 1. 1r

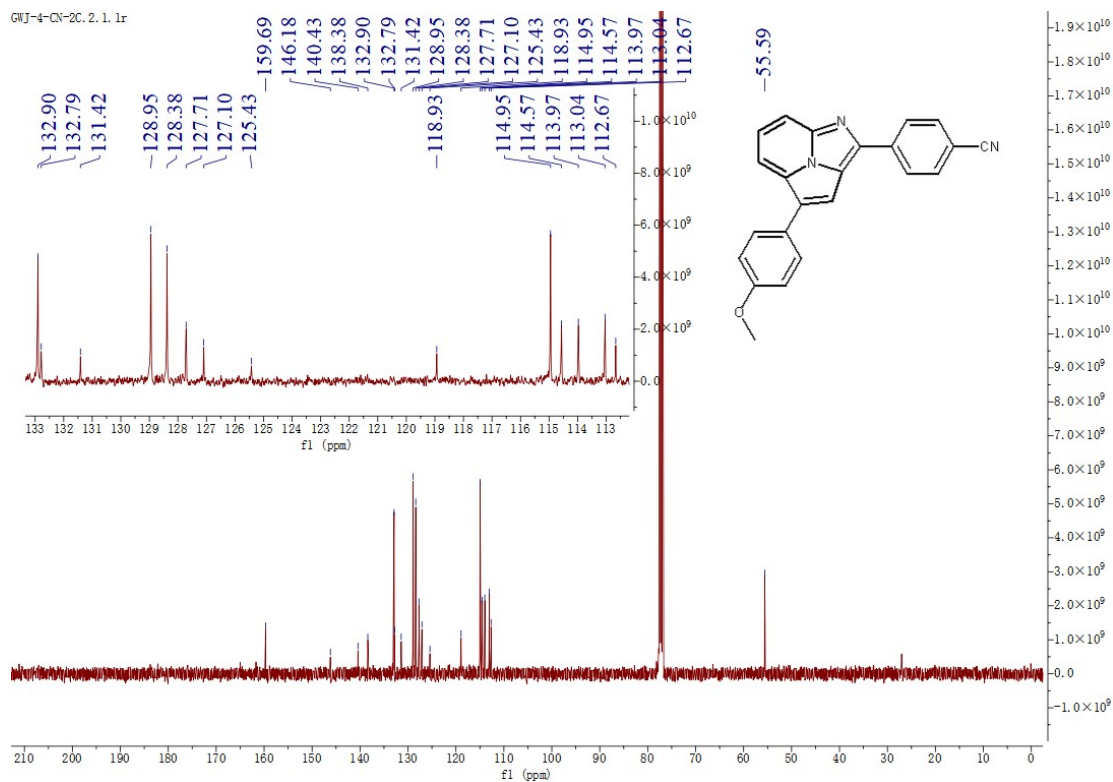

6-(4-methoxyphenyl)-1-(*o*-tolyl)imidazo[5,1-*cd*]indolizine (16):

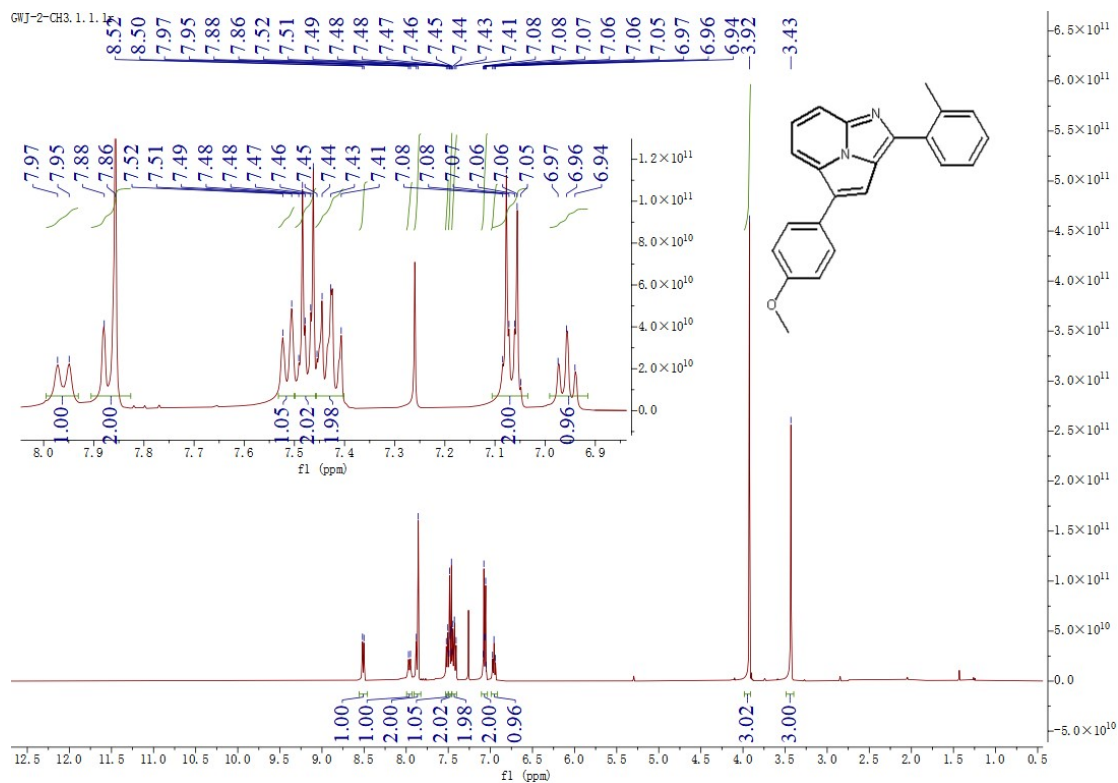



GWJ-2-CH3-C. 2.1.1r

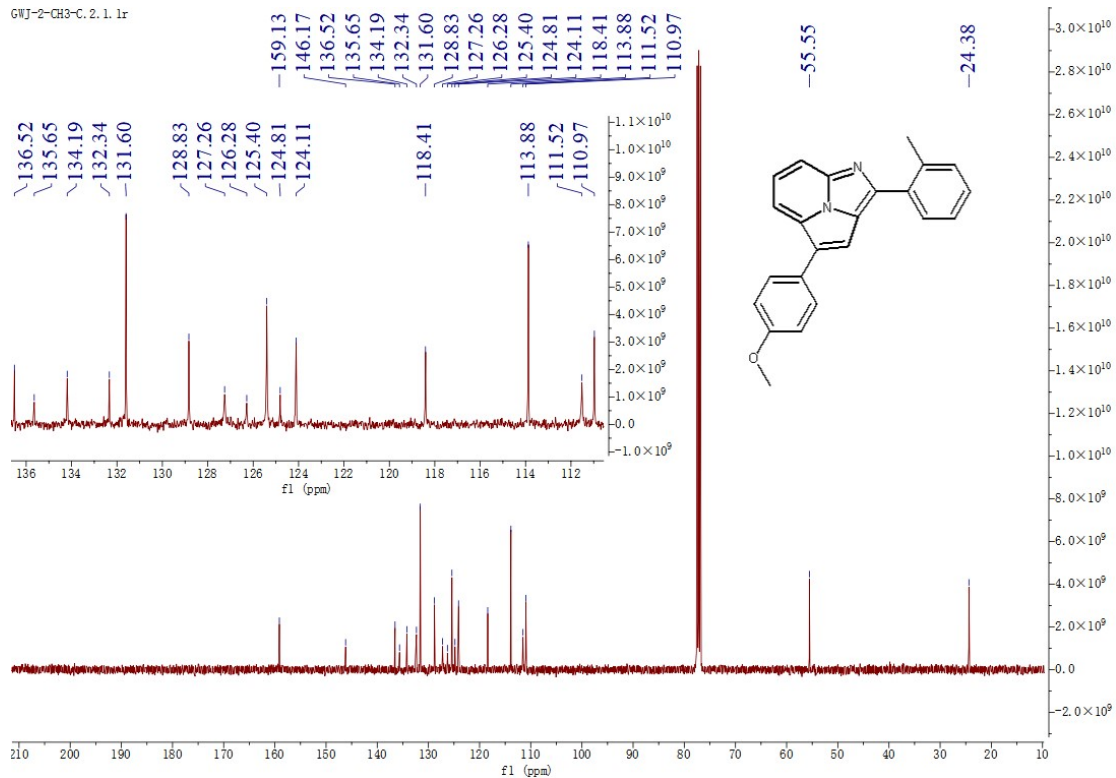

6-(4-methoxyphenyl)-1-(*m*-tolyl)imidazo[5,1,2-*cd*]indolizine (17):

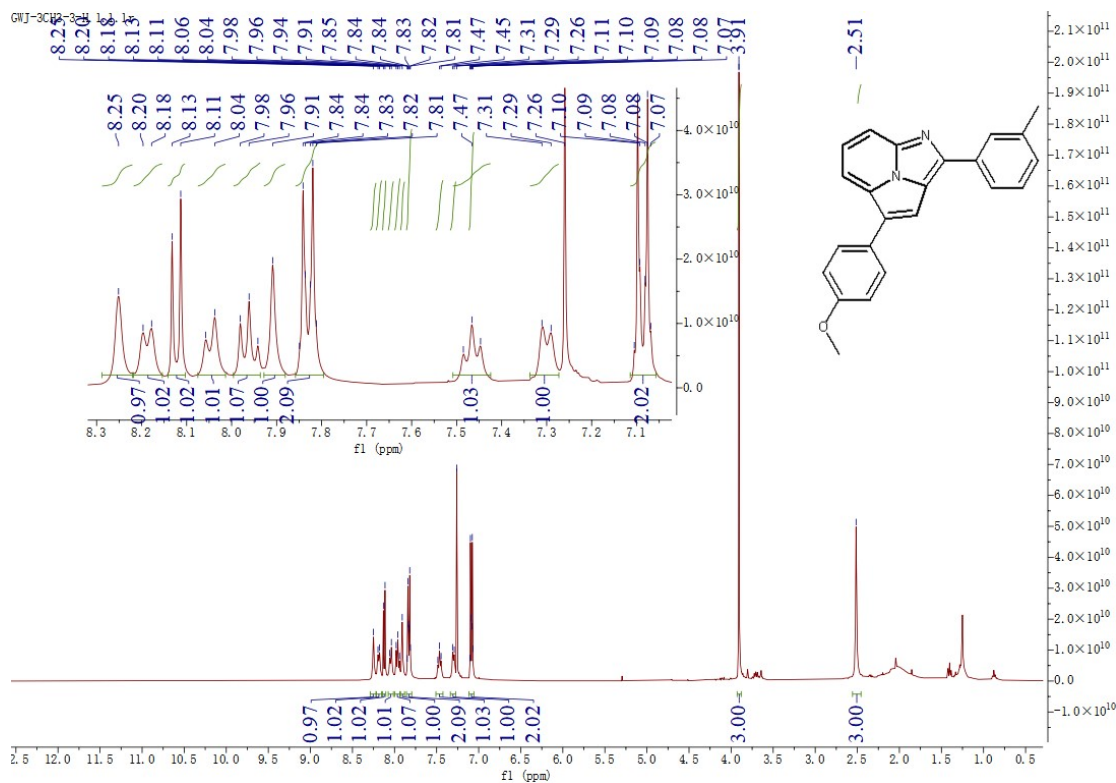



GWJ-3CN.2.1.1r

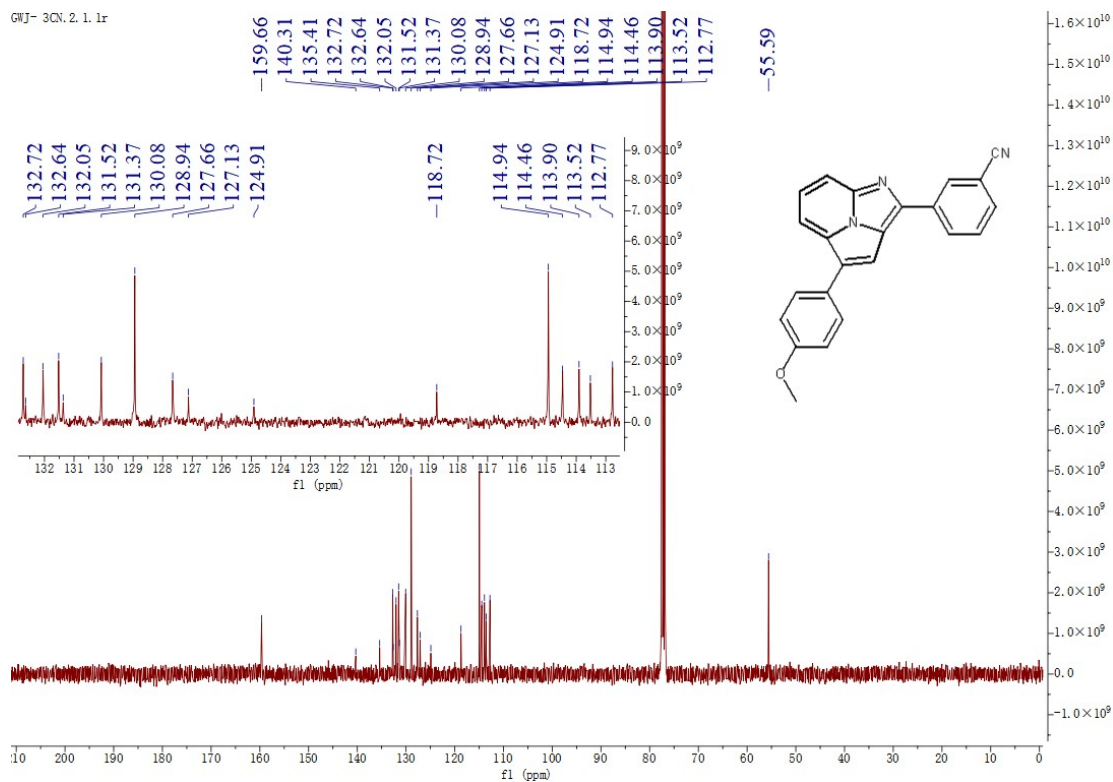

*tert*-butyl(4-(6-(4-methoxyphenyl)imidazo[5,1,2-*cd*]indolizin-1-yl)phenyl)carbamate  
(19)

GWJ-NHBoc-3.1.1.1r

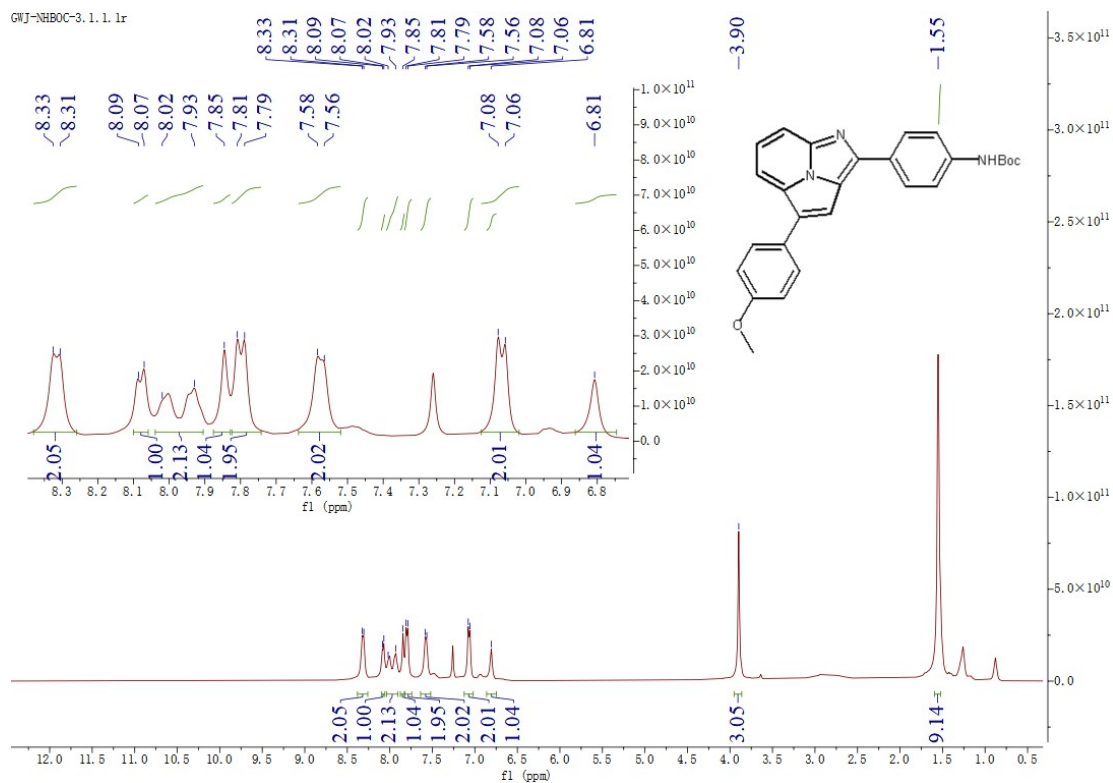



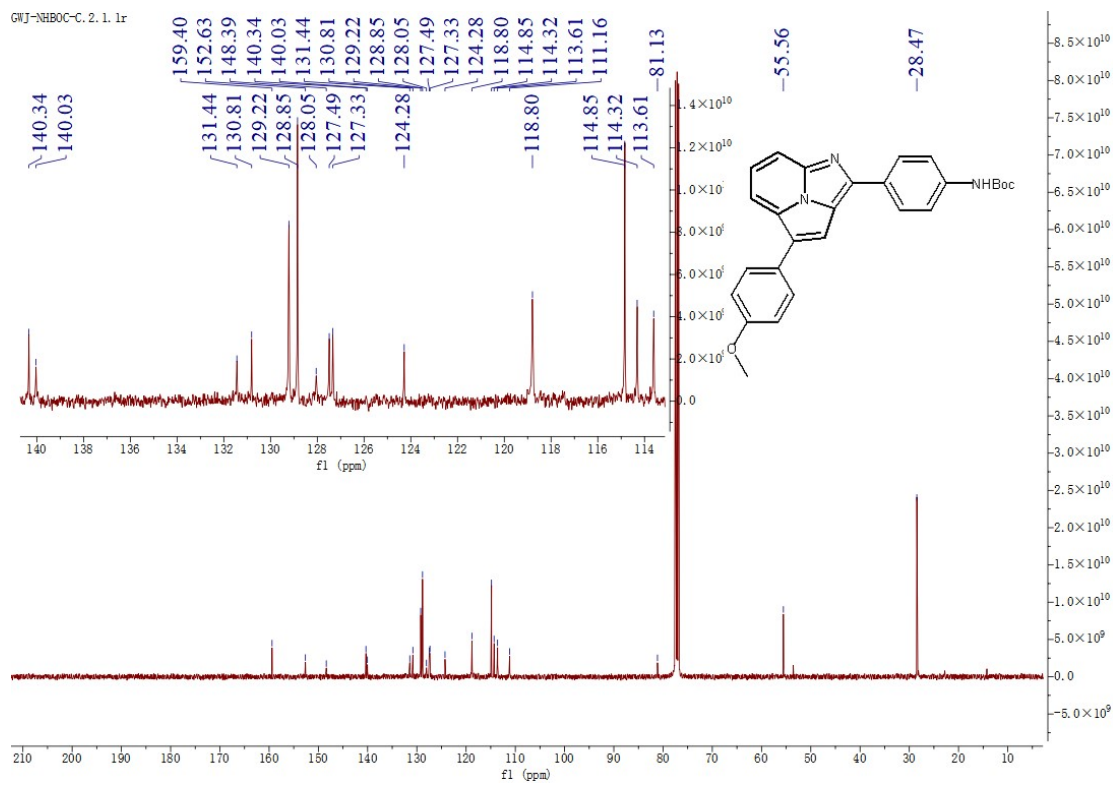

### 1-(4-(benzyloxy)phenyl)-6-(4-methoxyphenyl)imidazo[5,1,2-cd]indolizine (20)

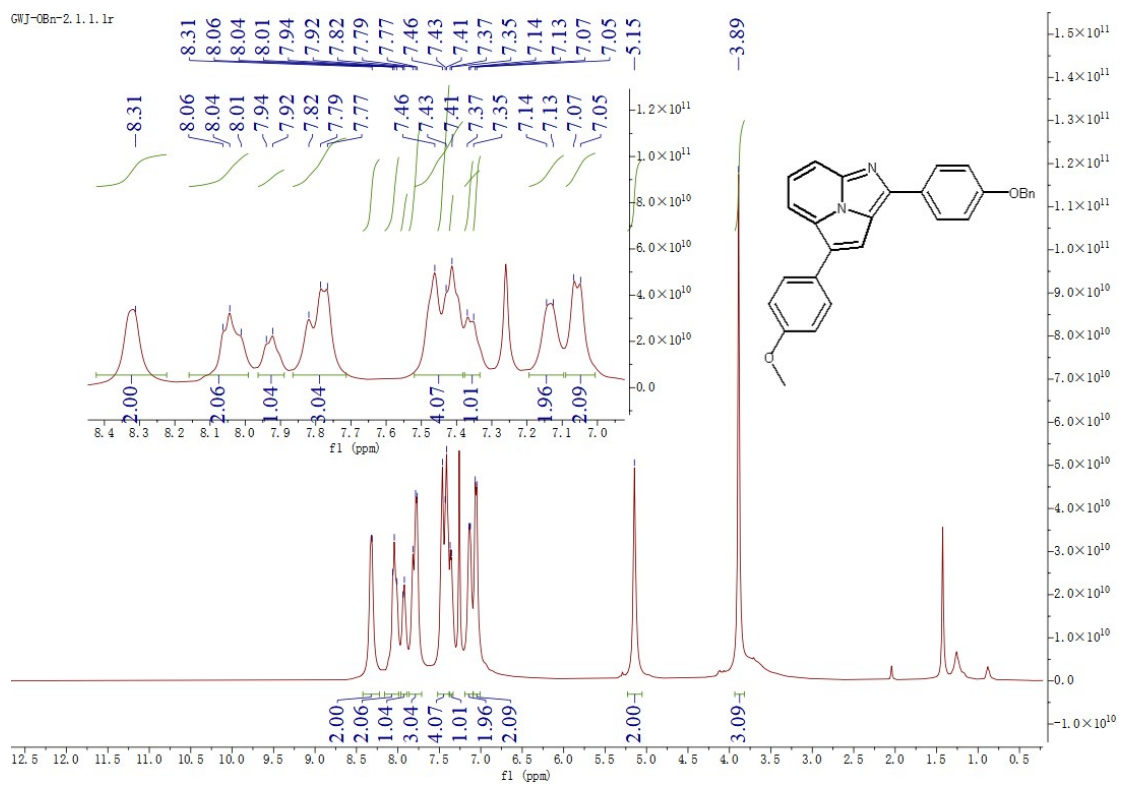

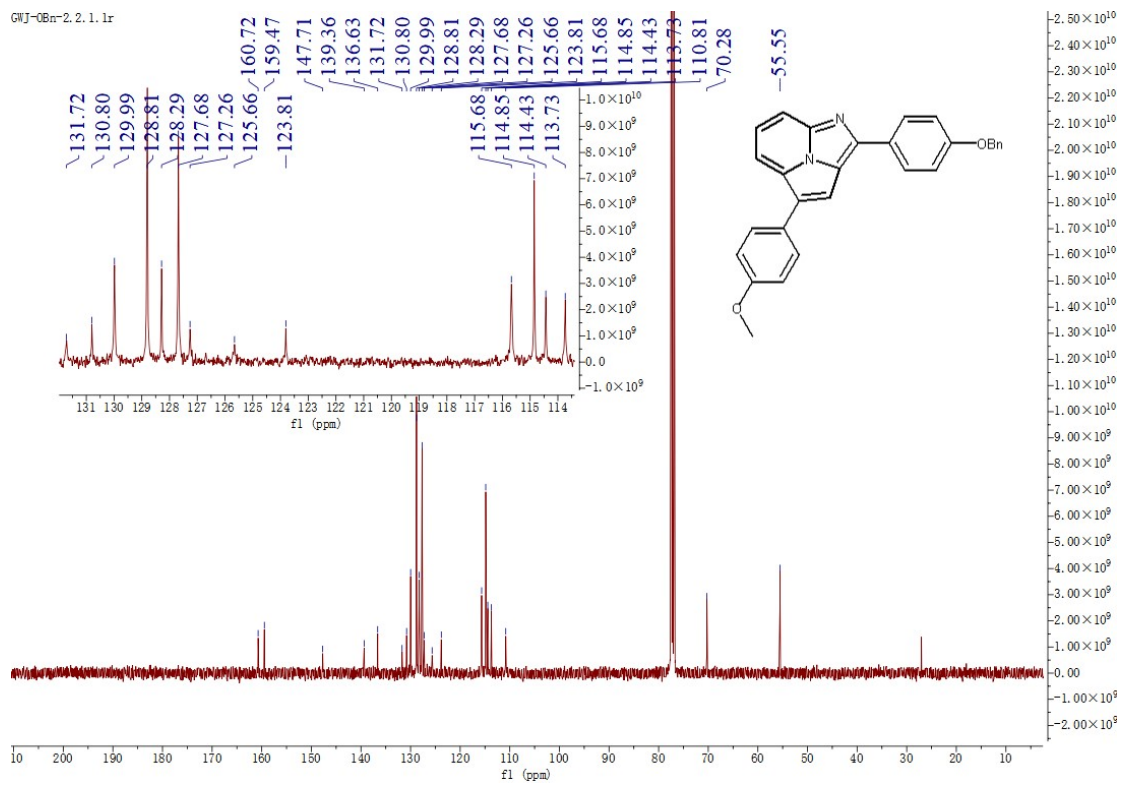

6-(4-methoxyphenyl)-1-(thiophen-2-yl)imidazo[5,1,2-cd]indolizine (21)

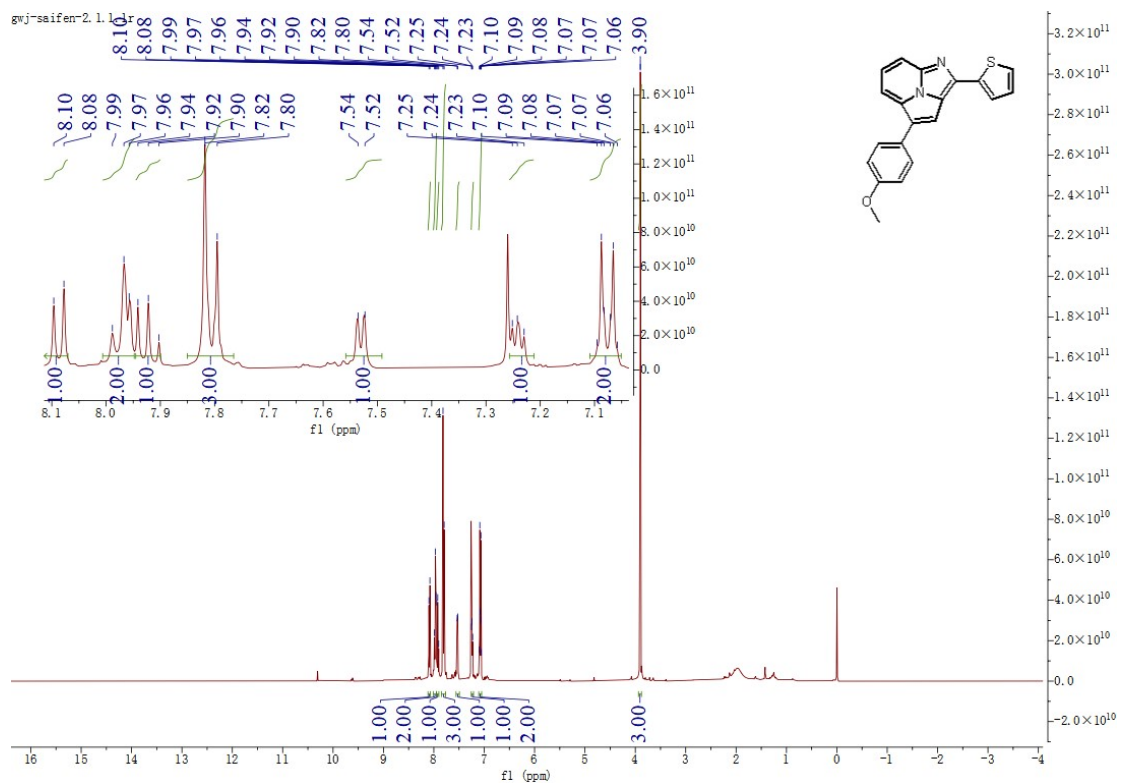

GWJ-SAIFEN4.2.1.1r

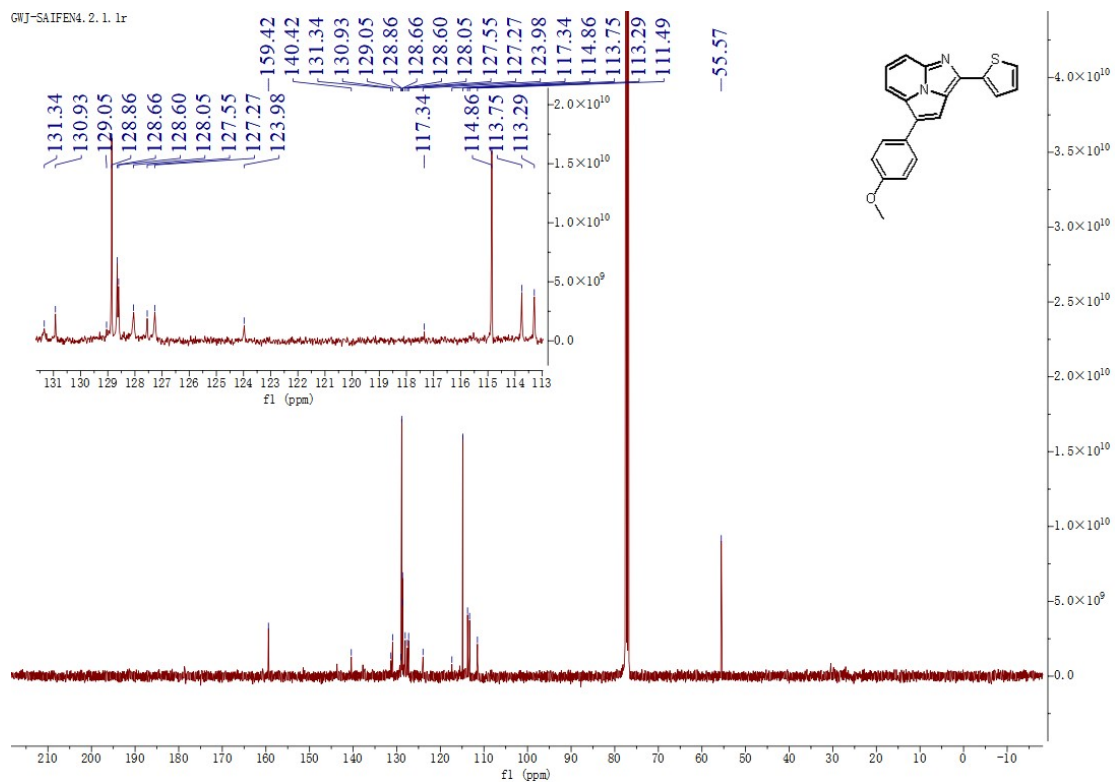

### 6-(4-methoxyphenyl)imidazo[5,1,2-cd]indolizine (22)

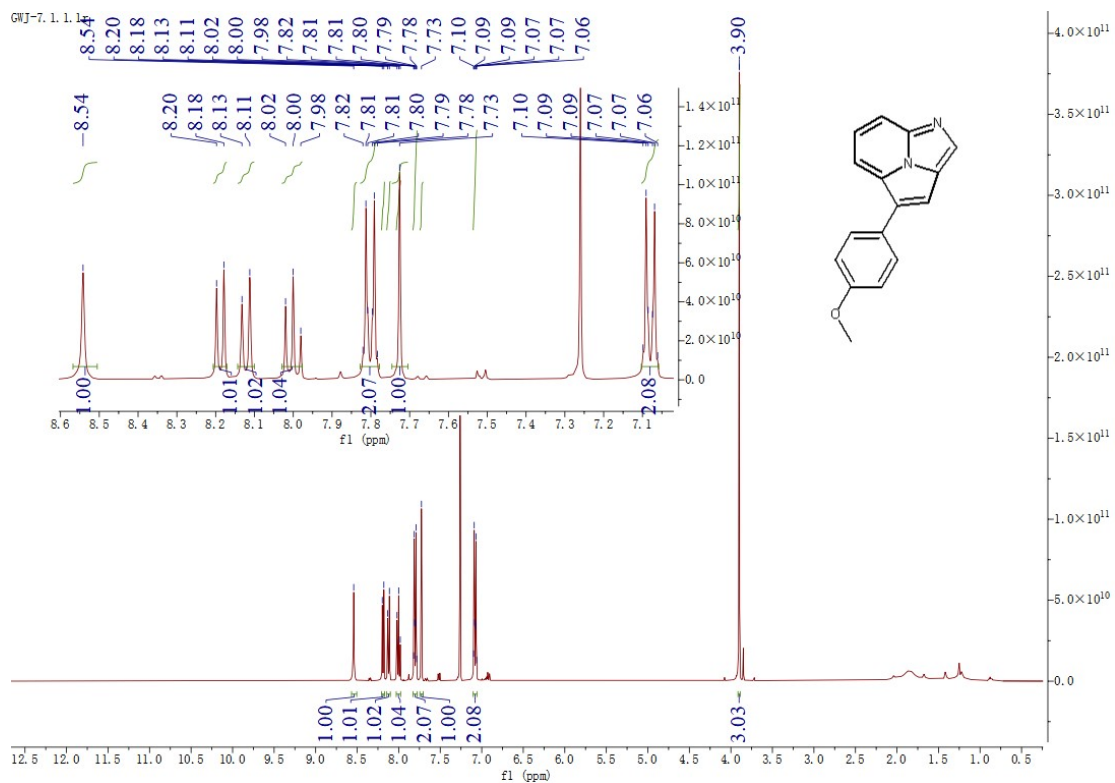

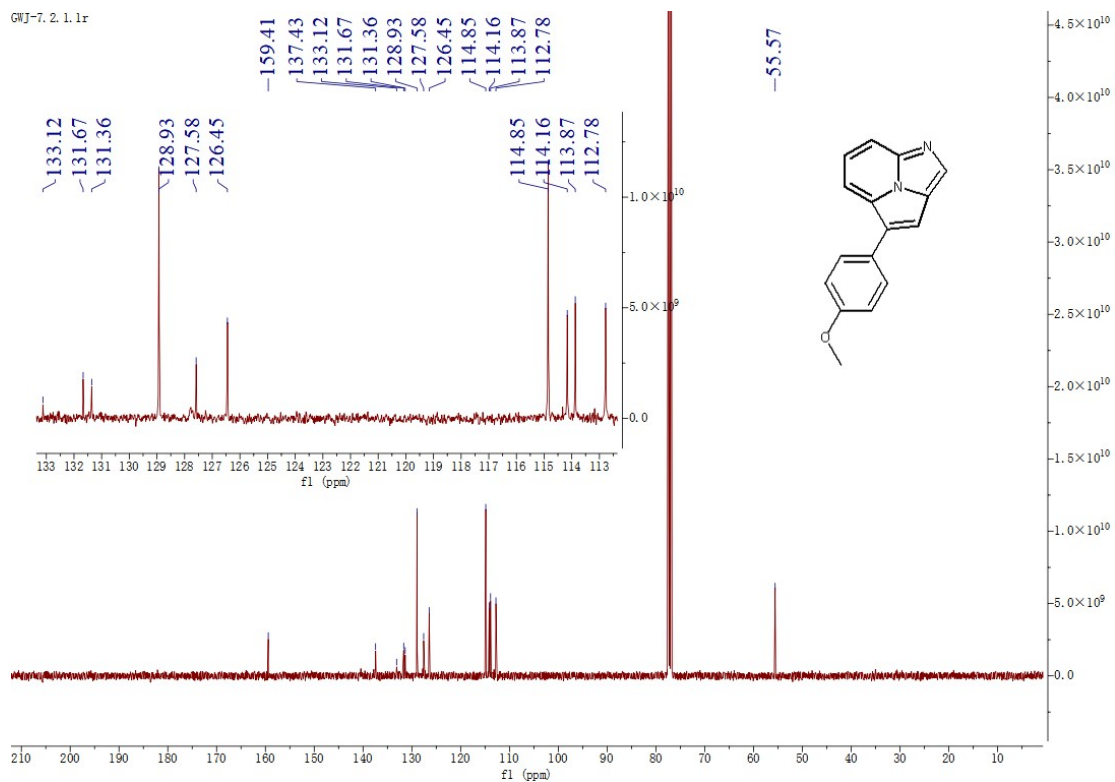

6-(4-methoxyphenyl)-5-methyl-1-phenylimidazo[5,1,2-cd]indolizine (23):

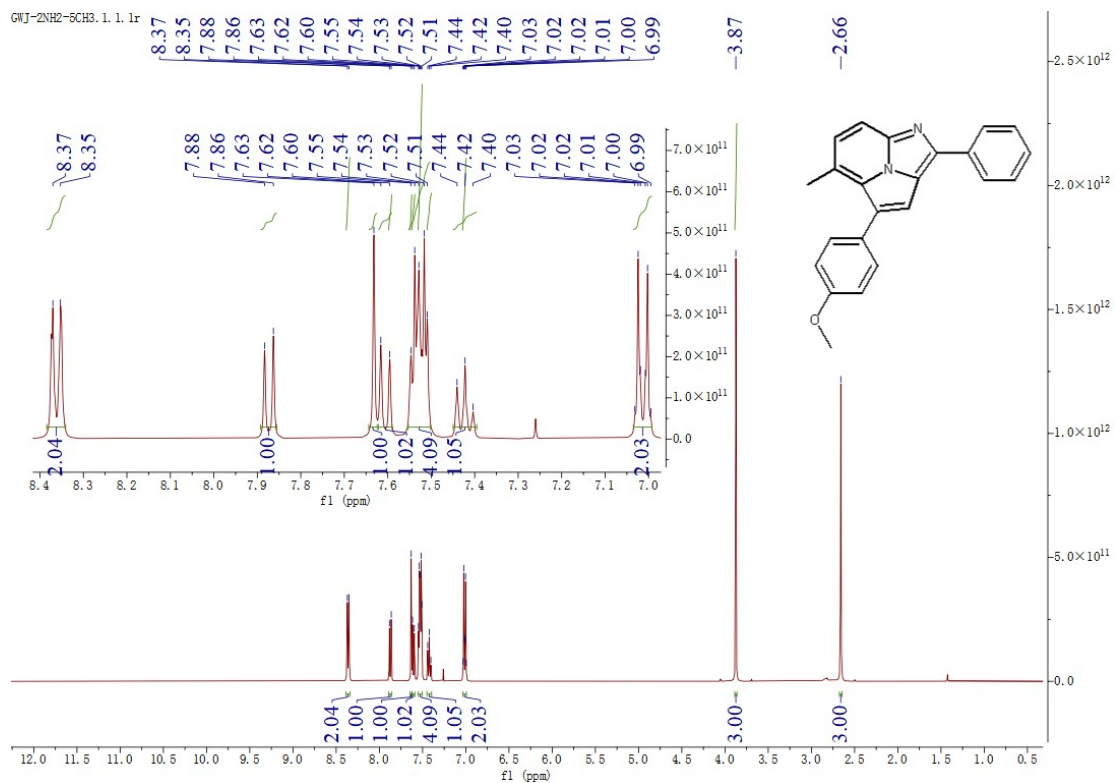

GWJ-2NH2-5CH3. 2. 1. 1r

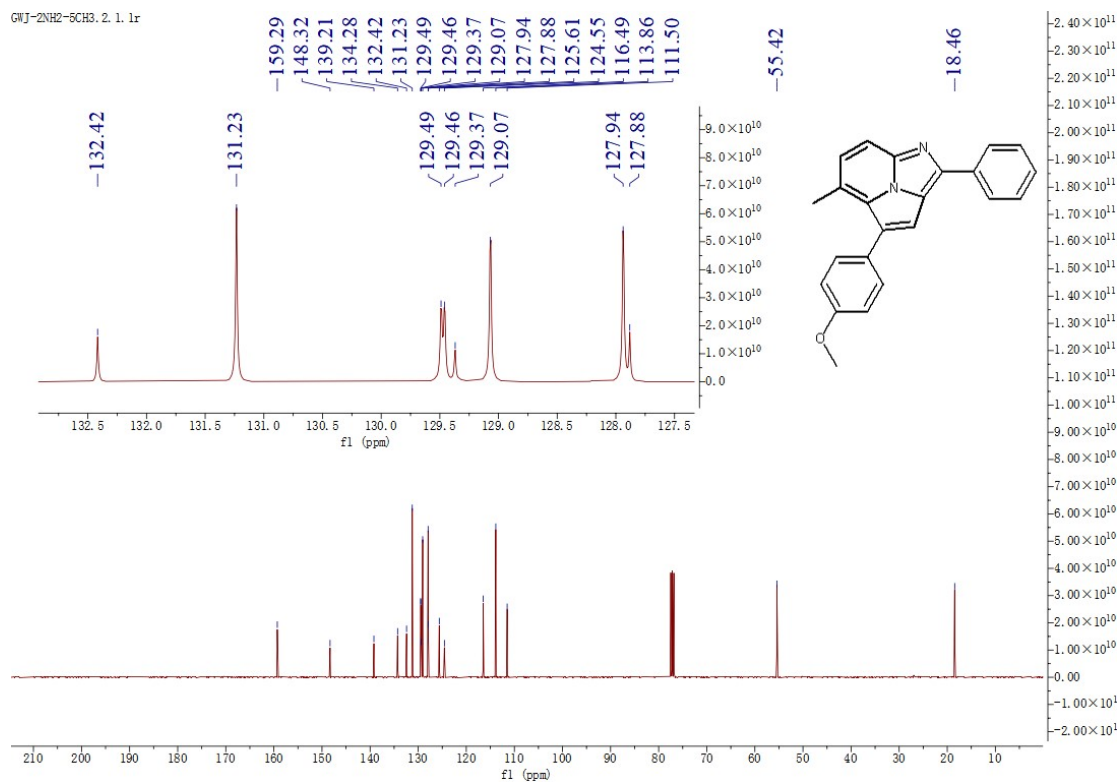

5-fluoro-6-(4-methoxyphenyl)-1-phenylimidazo[5,1,2-cd]indolizine (24):

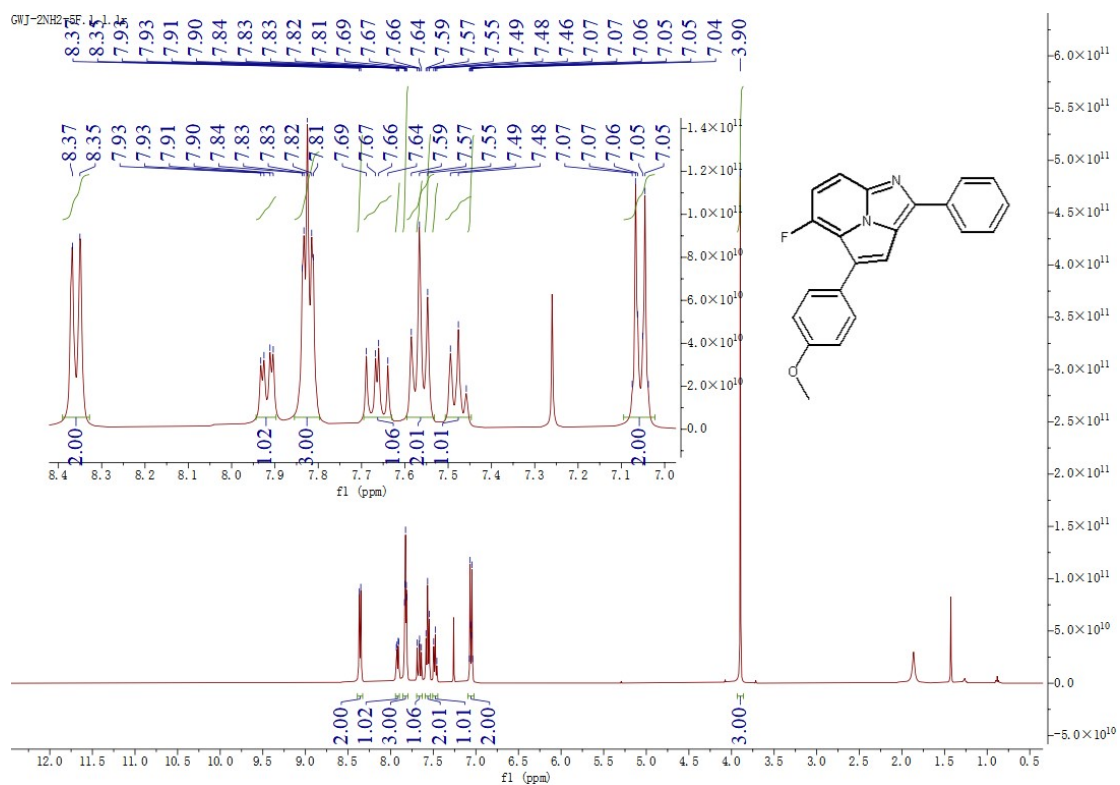



GWJ-2NH2-5F. 3. 1. 1r

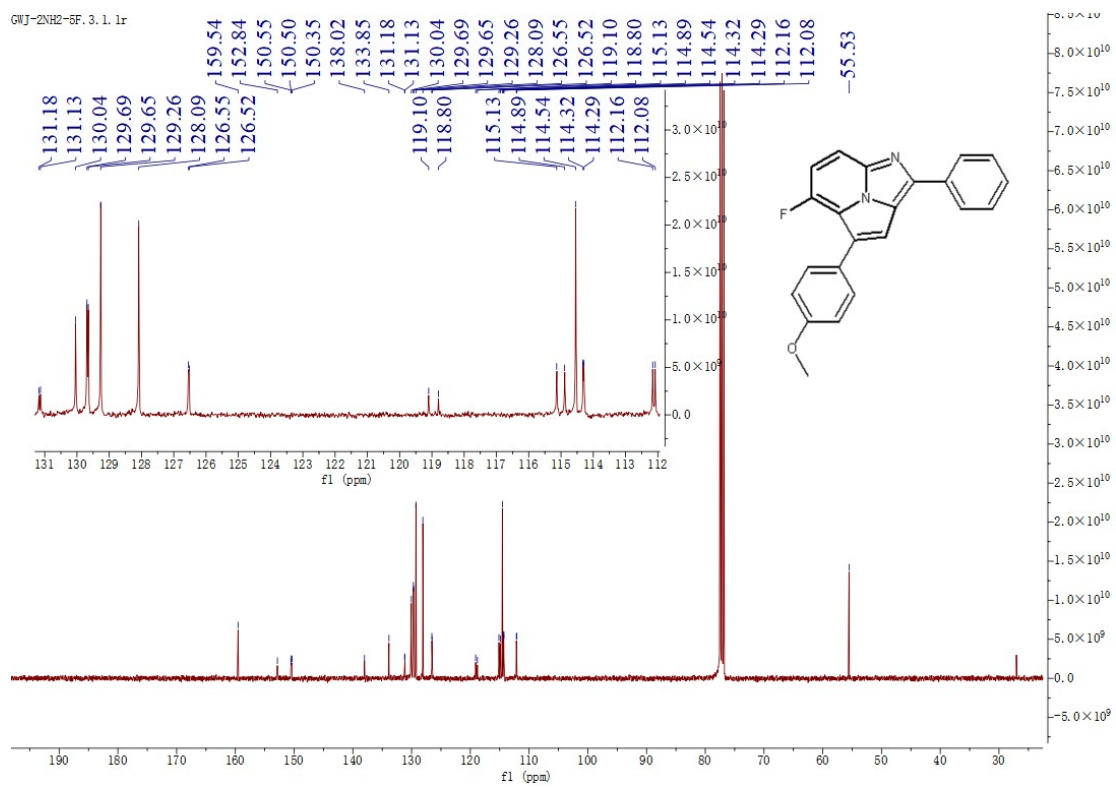

GWJ-2NH2-5F. 2. 1. 1r

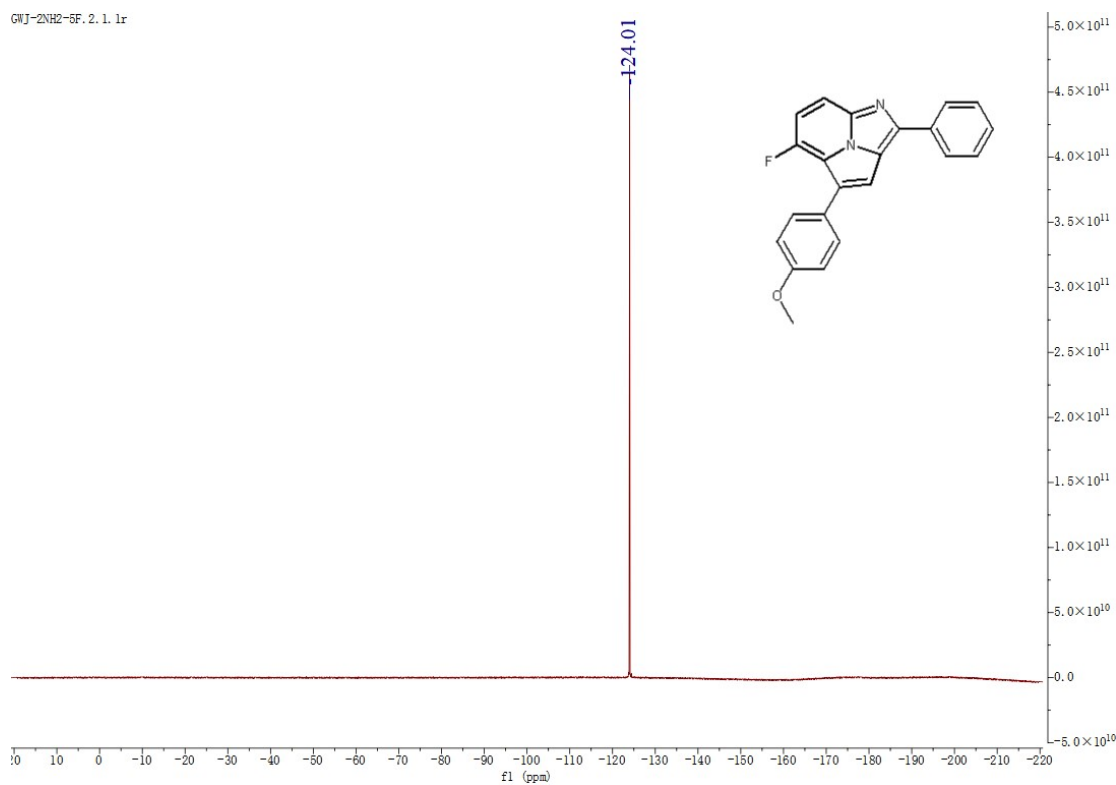

5-chloro-6-(4-methoxyphenyl)-1-phenylimidazo[5,1,2-cd]indolizine (**25**):

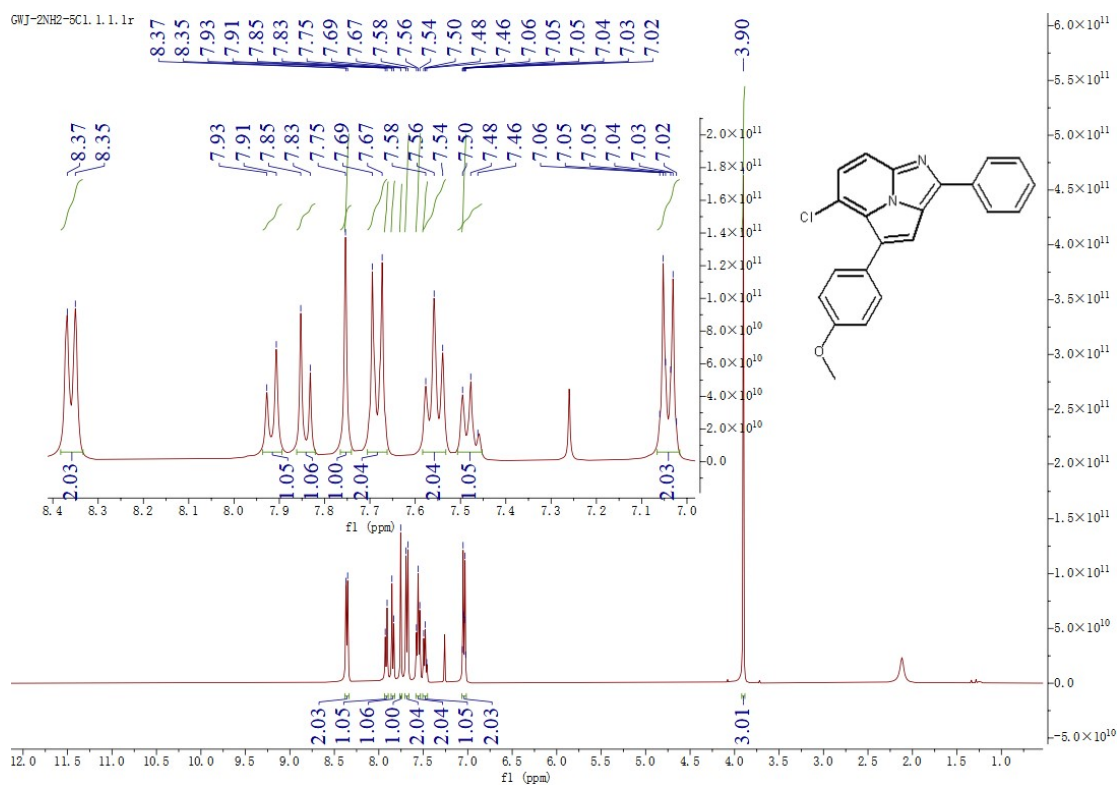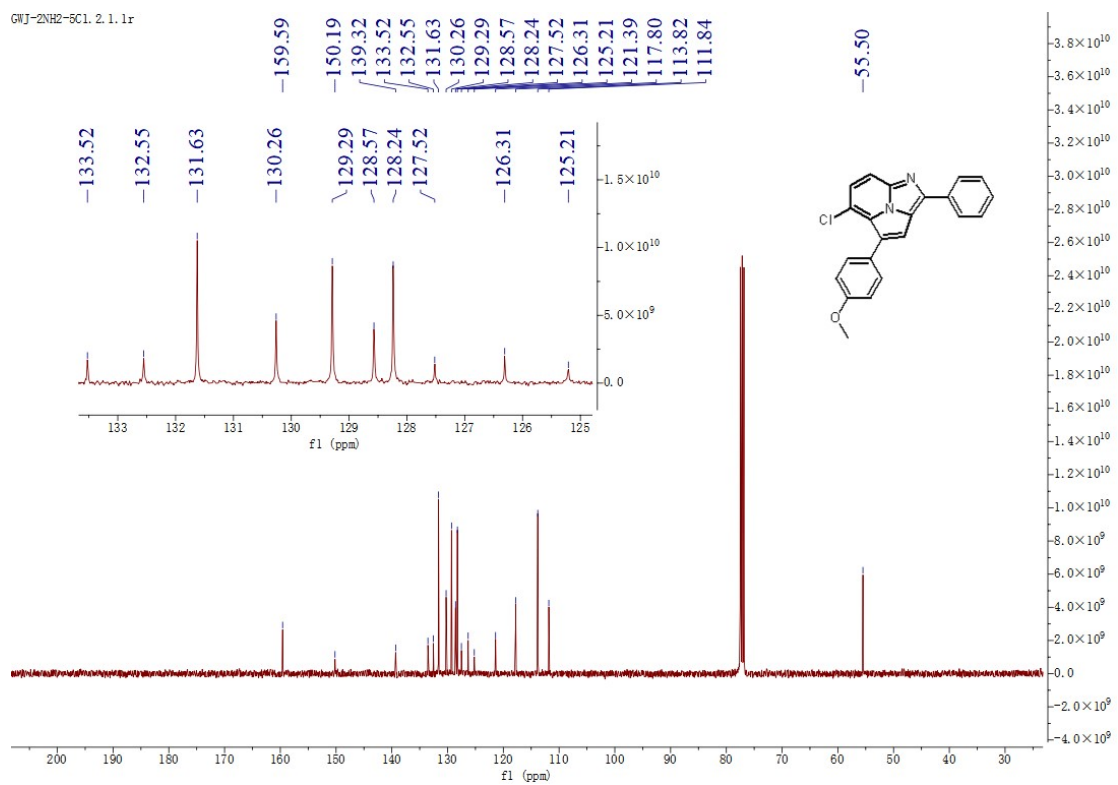

6-(4-methoxyphenyl)-1-phenylimidazo[5,1,2-cd]indolizine-5-carbonitrile (**26**):

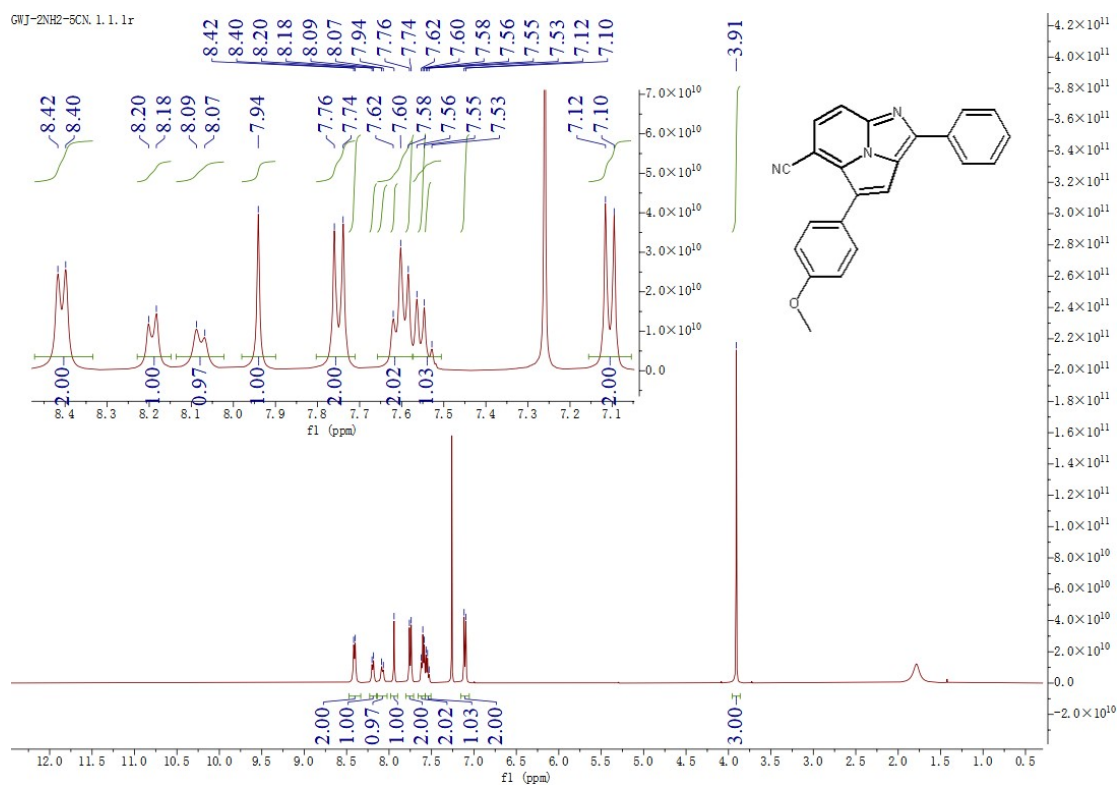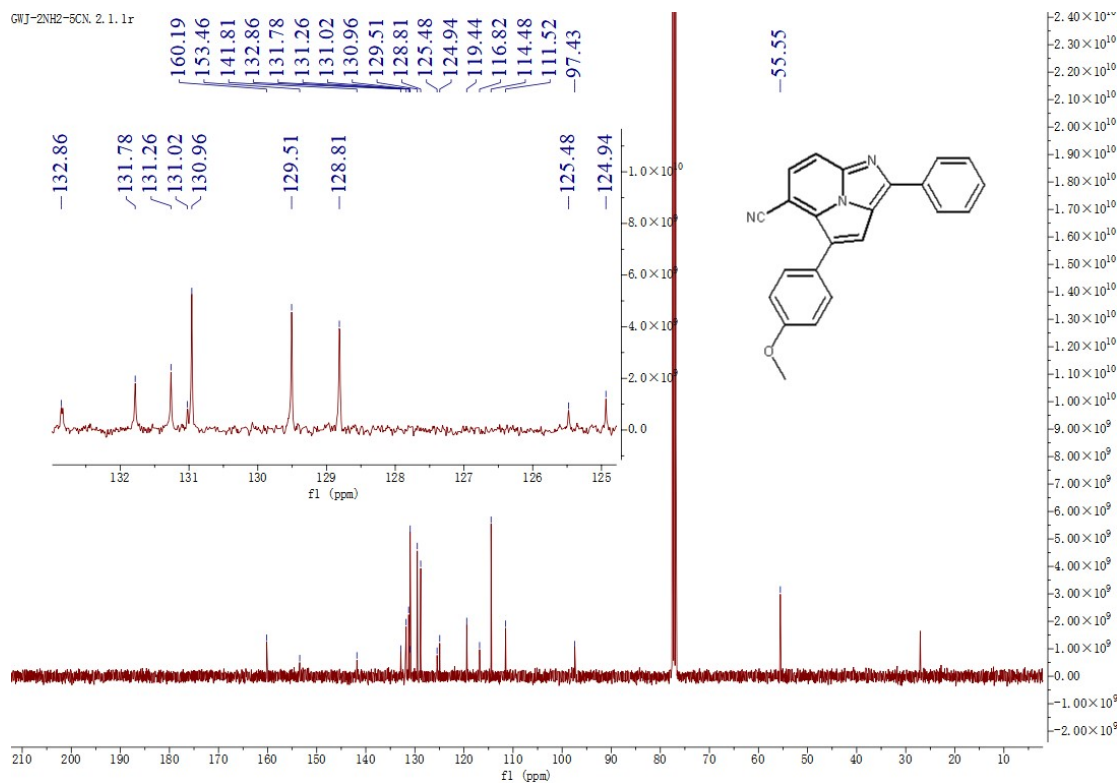



(4-methoxyphenyl)-1-phenyl-5-(trifluoromethyl)imidazo[5,1,2-*cd*]indolizine (27):

GWJ-2NH2-5CF3-2.1.1.1r

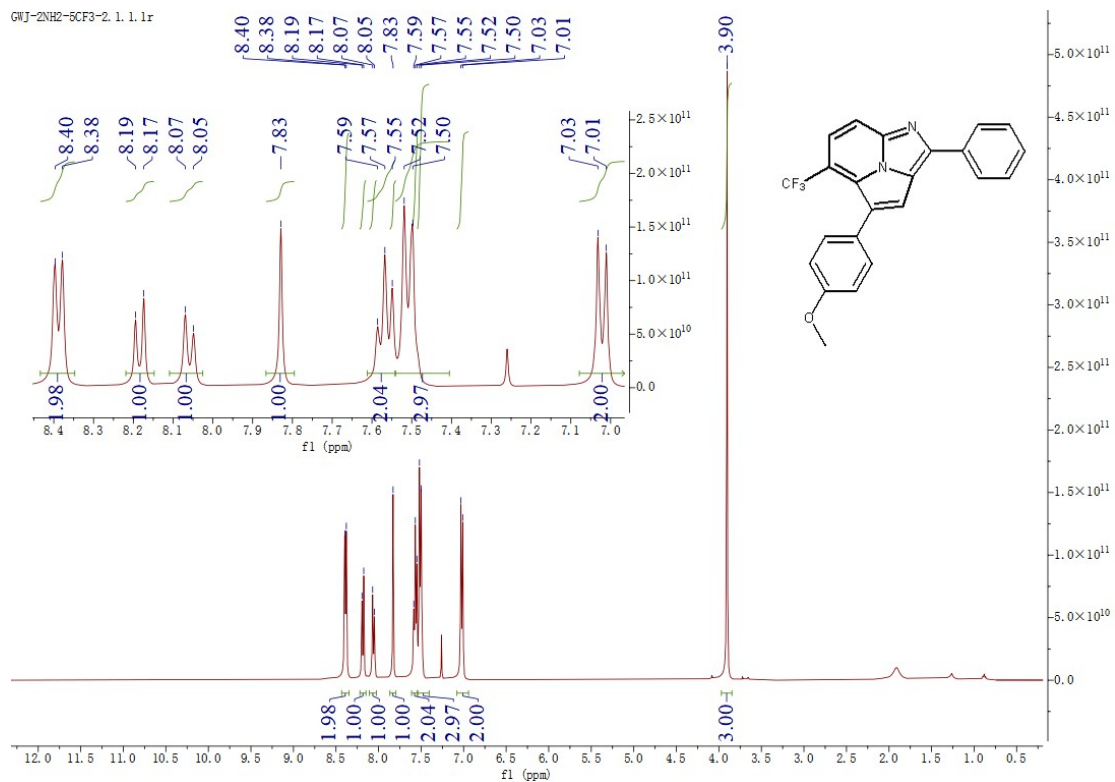

GWJ-2NH2-5CF3-2.2.1.1r

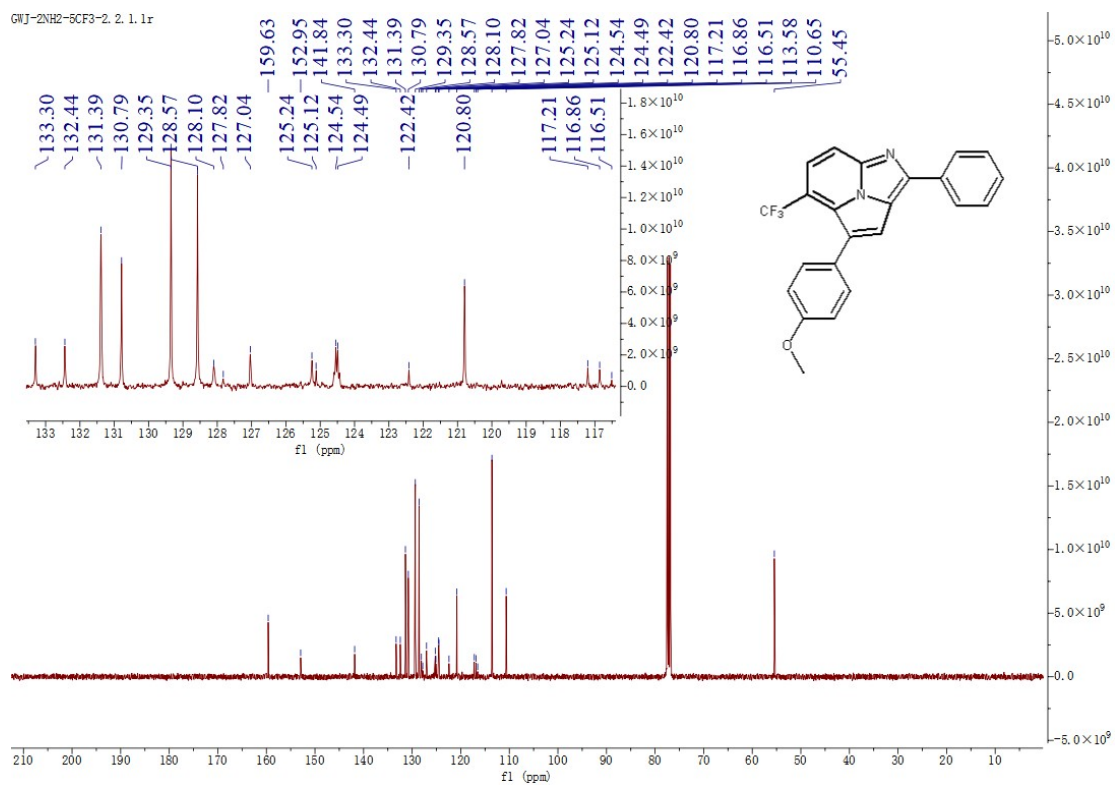

GWJ-2NH2-5CF3. 2. 1. 1r

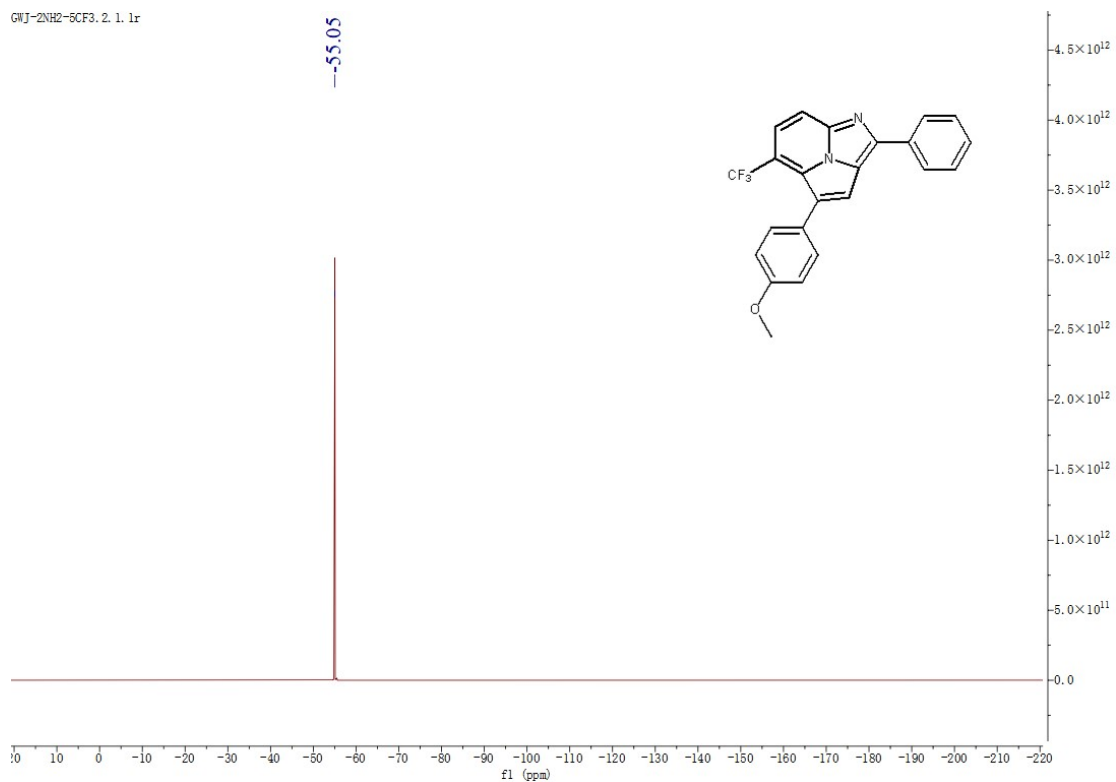

4-chloro-6-(4-methoxyphenyl)-1-phenylimidazo[5,1,2-cd]indolizine (**28**):

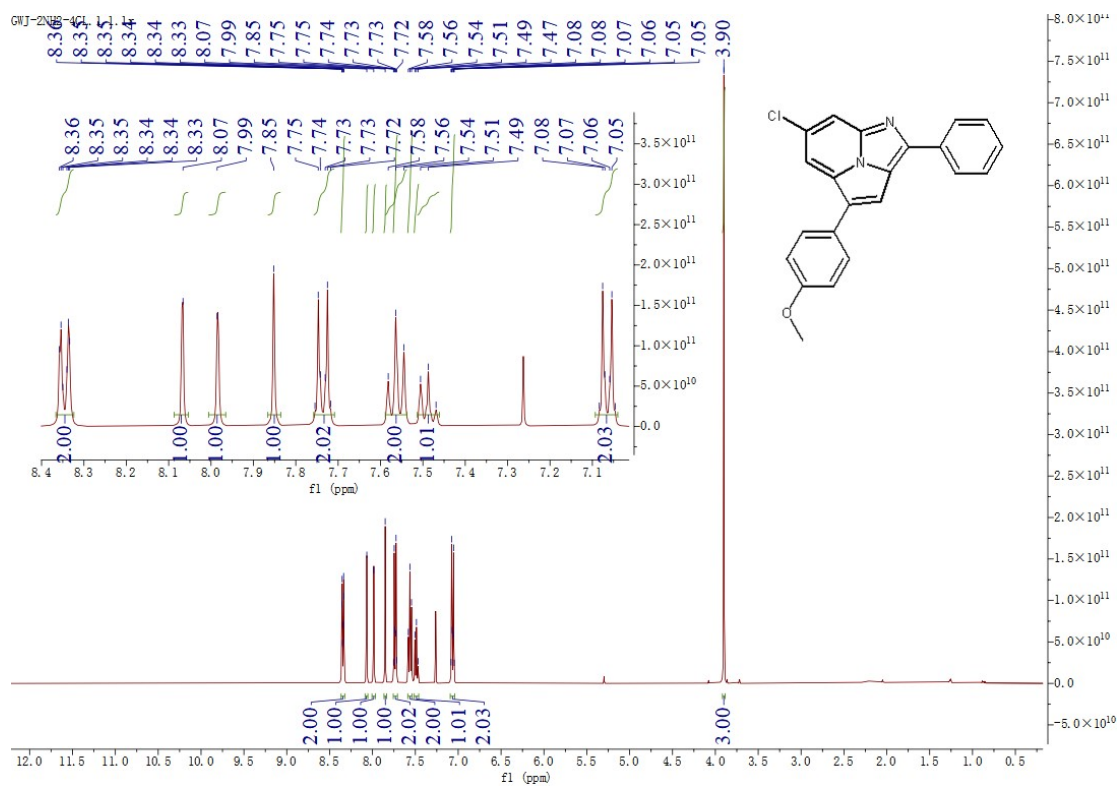

GWJ-2NH2-4CL. 2.1.1r

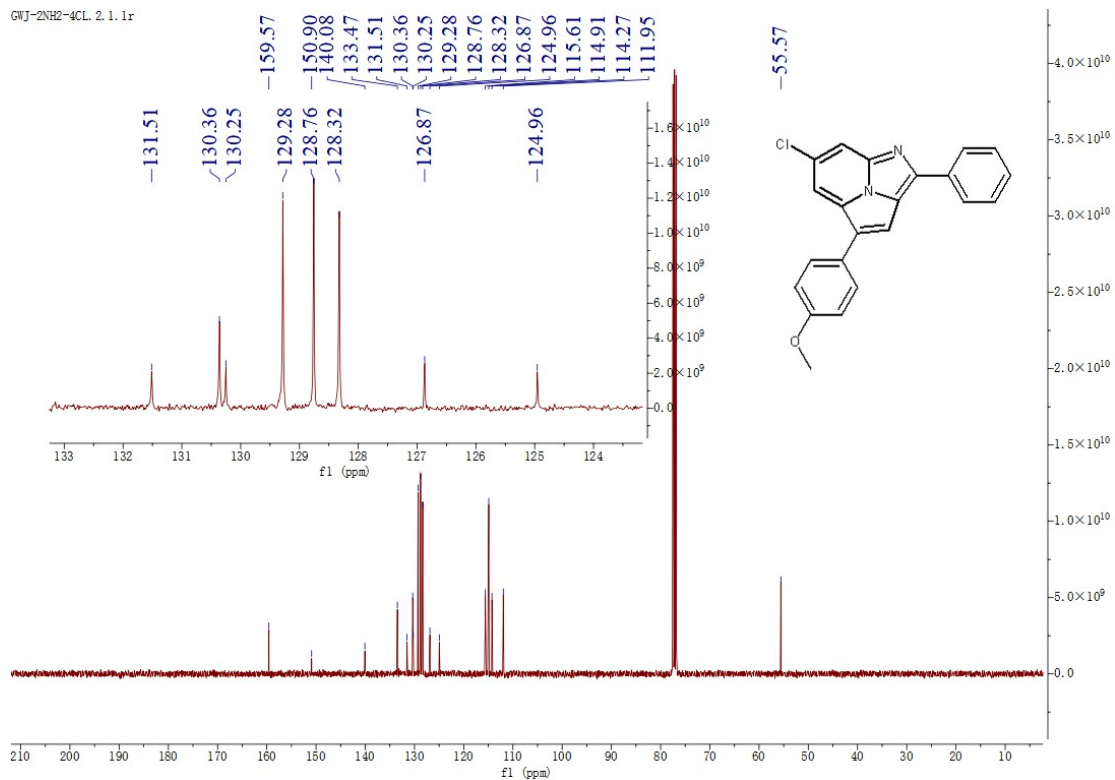

5-bromo-3-(4-methoxyphenyl)-1-phenylimidazo[5,1-b]indole (**29**):

GWJ-2NH2-3I-5-BR. 1.1.1r

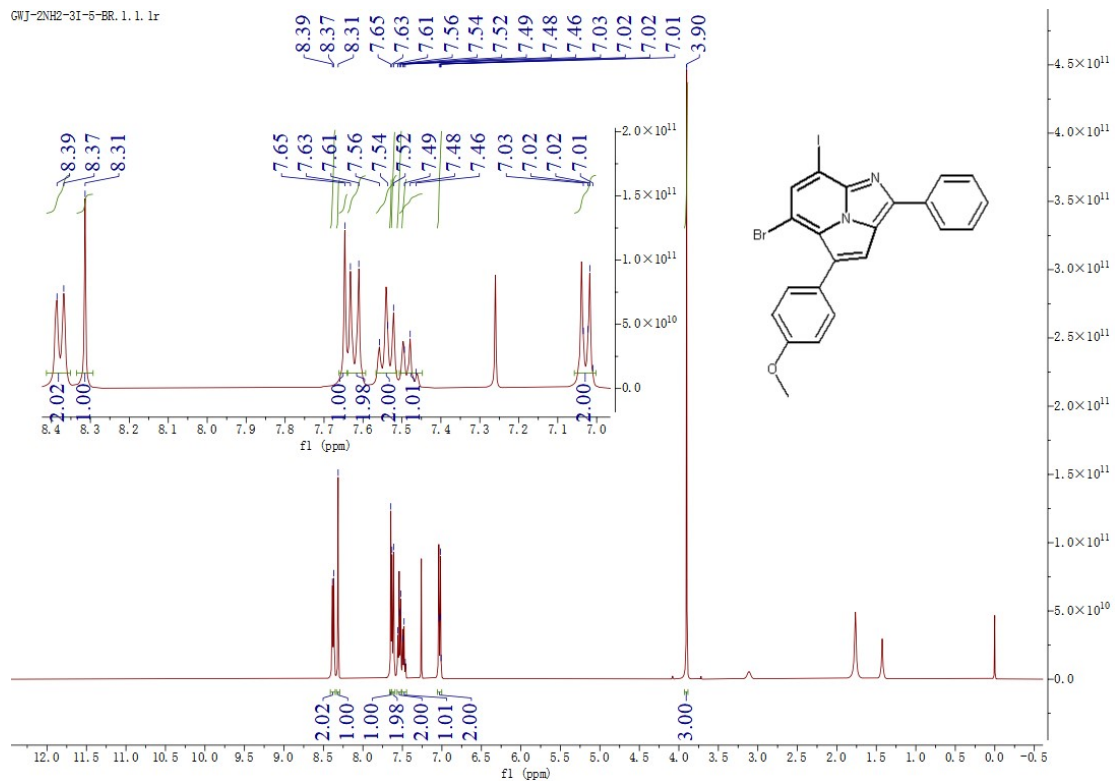

GWJ-2NH2-3I-5-ER. 2.1.1r

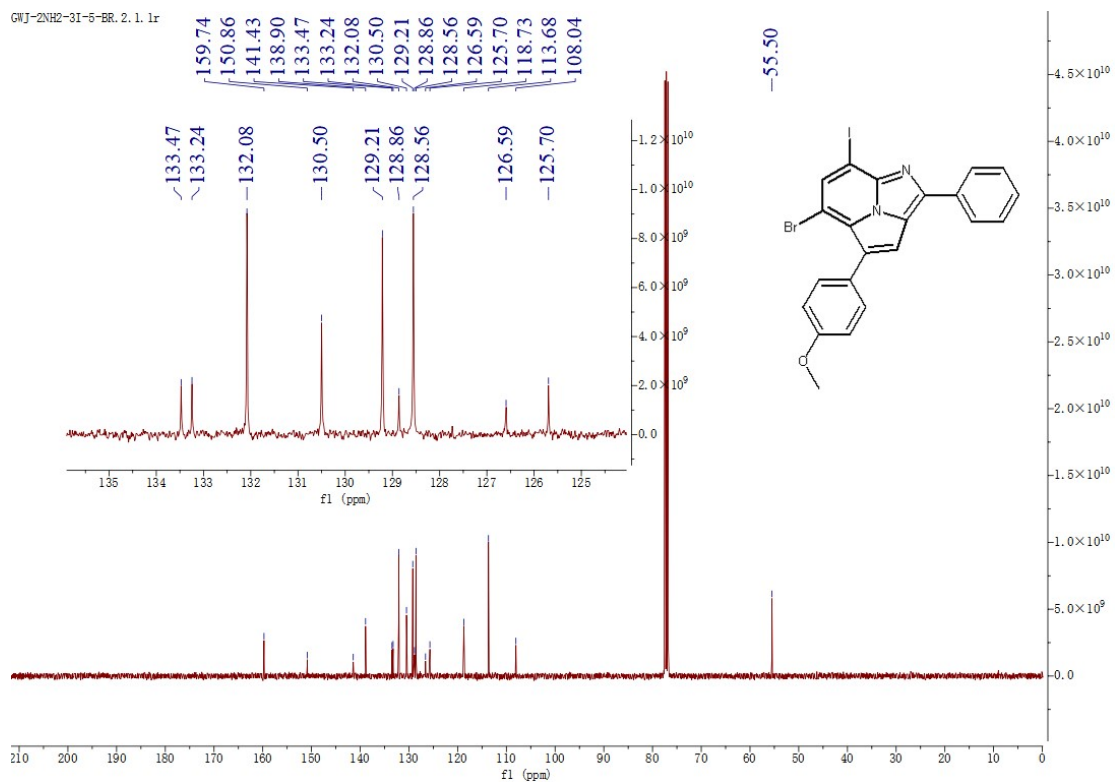

1-(4-methoxyphenyl)-3-phenyl-2a,1,4,5-triazacyclopenta[cd]indene (30):

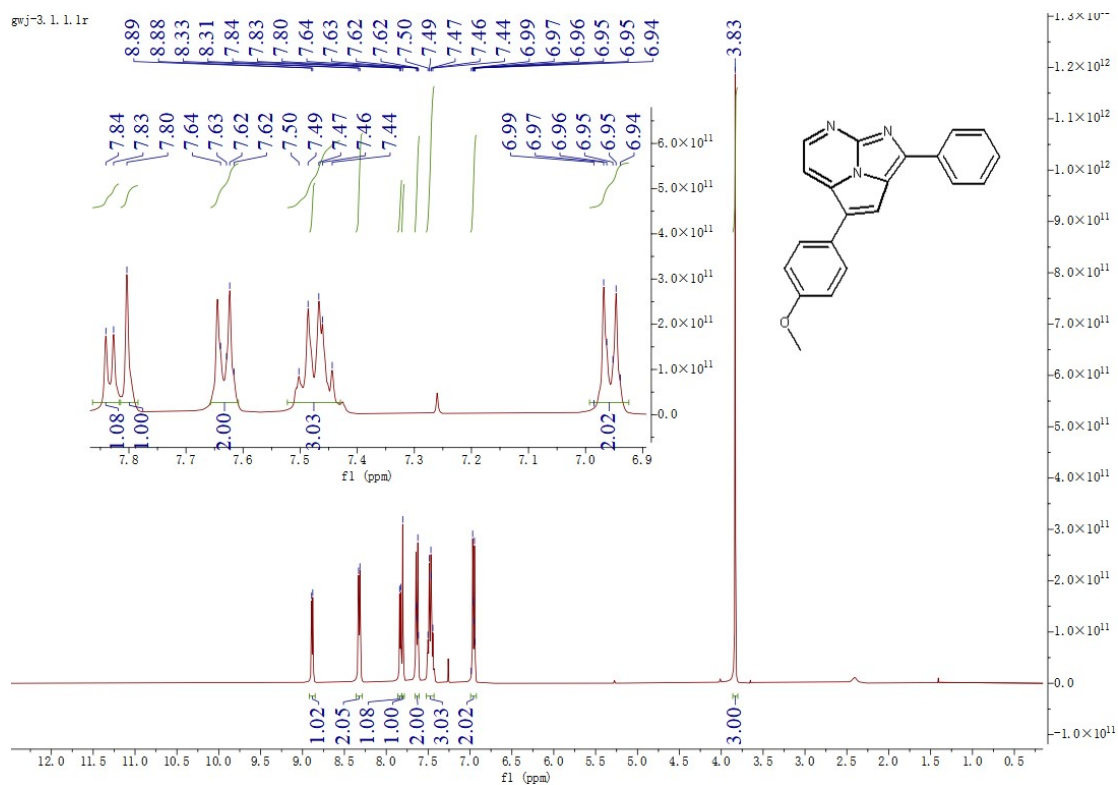

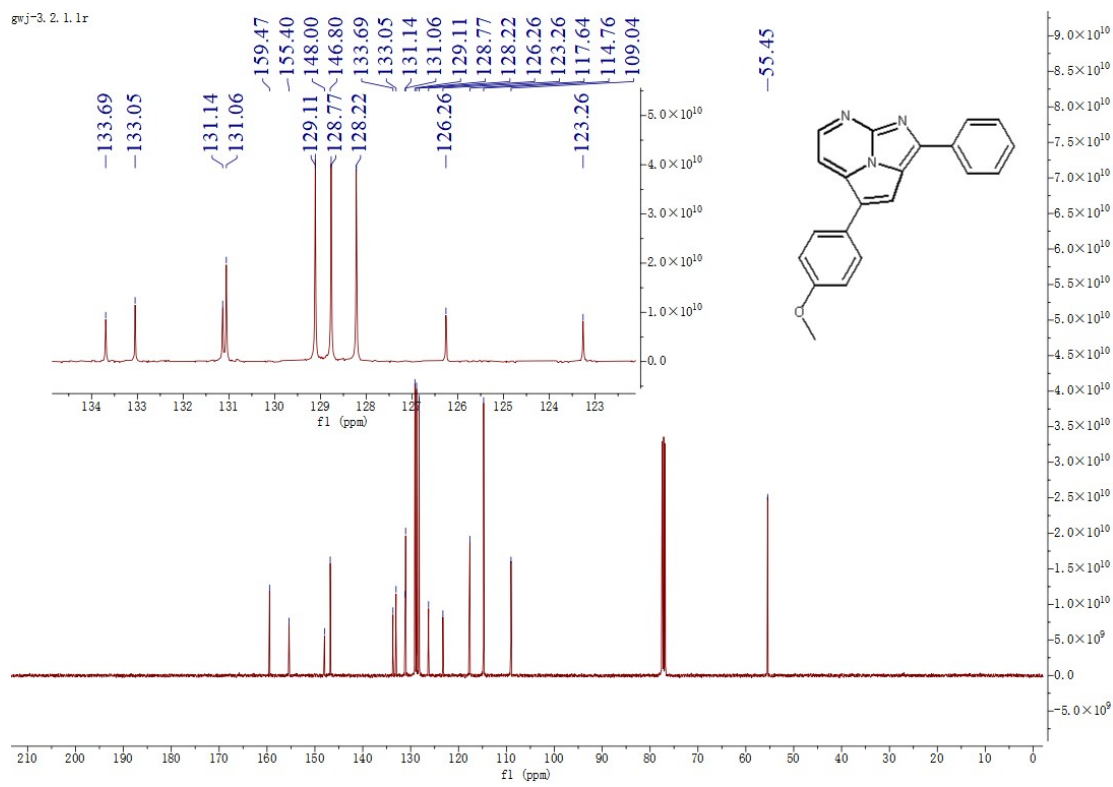

6-(4-methoxyphenyl)-8-methylnaphtho[1',2':4,5]imidazo[1,2-a]pyridine (31)

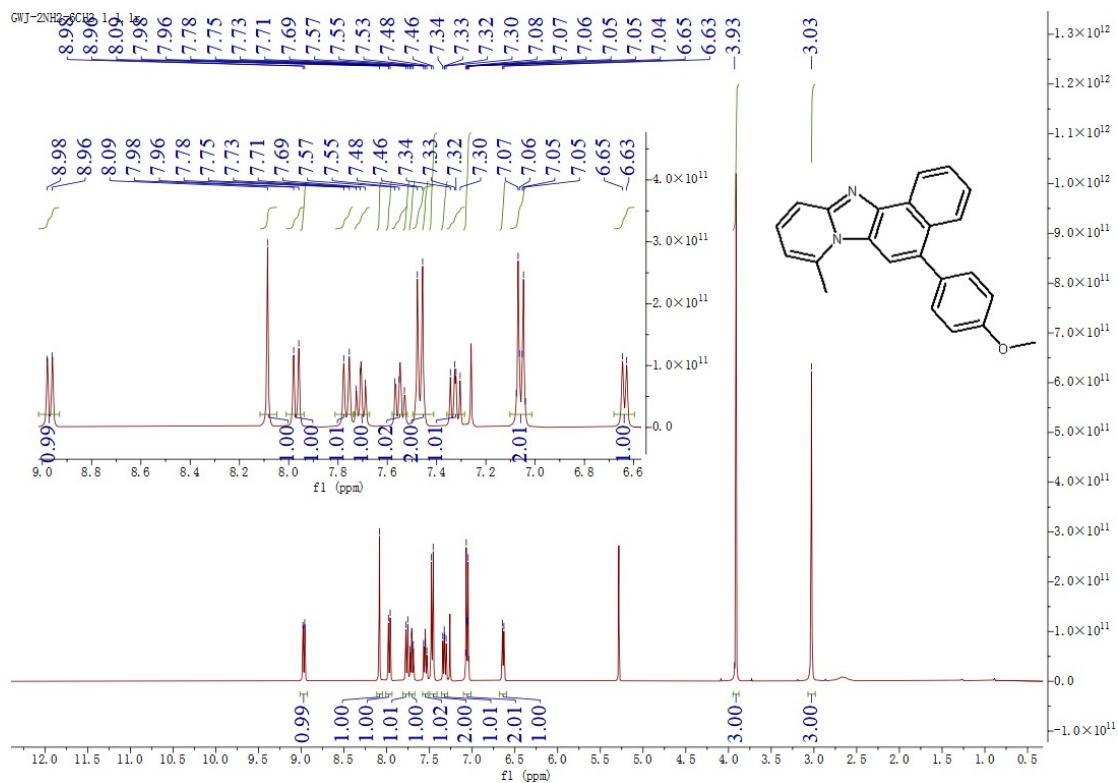



GWJ-2NH2-6CH3. 2. 1. 1r

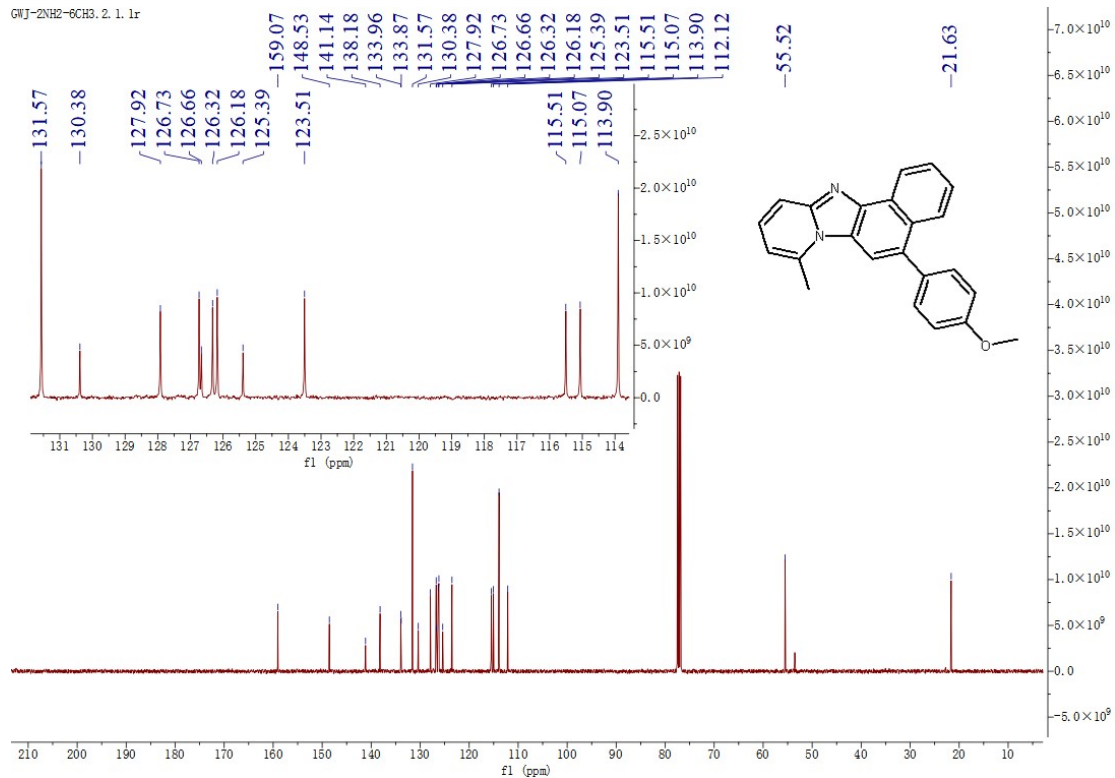

### 6-(4-methoxyphenyl)naphtho[1,2':4,5]imidazo[2,1-b]thiazole (32)

GWJ-5. 1. 1. 1r

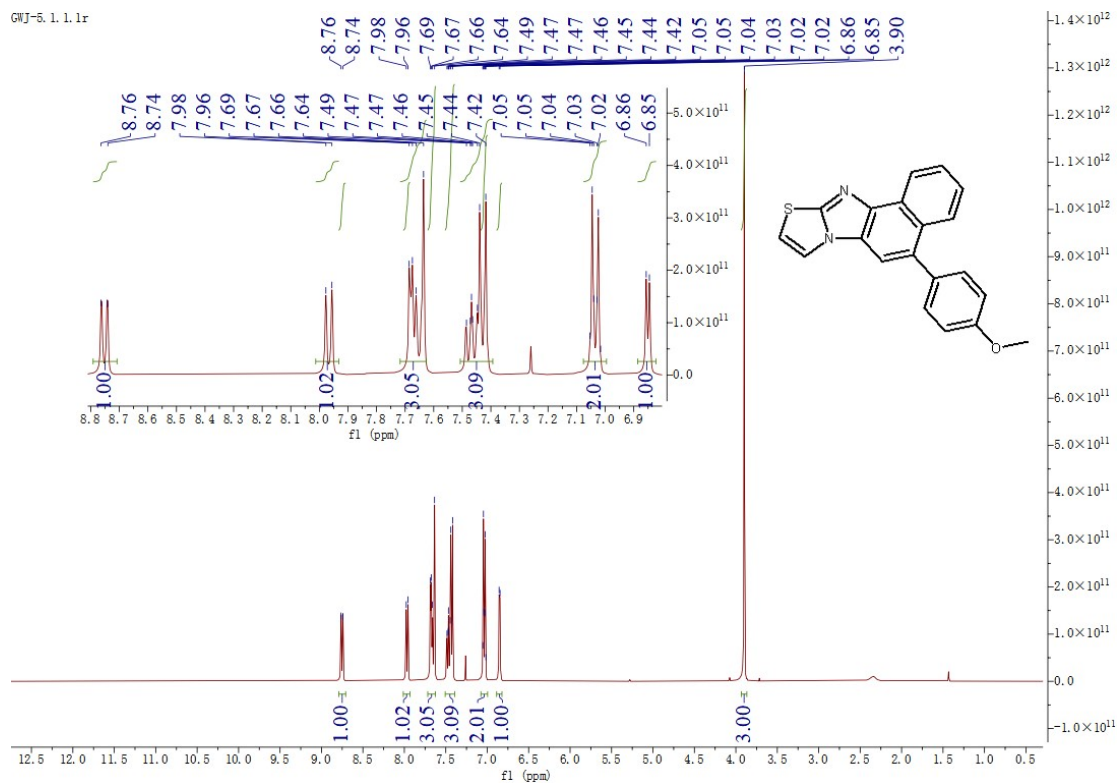

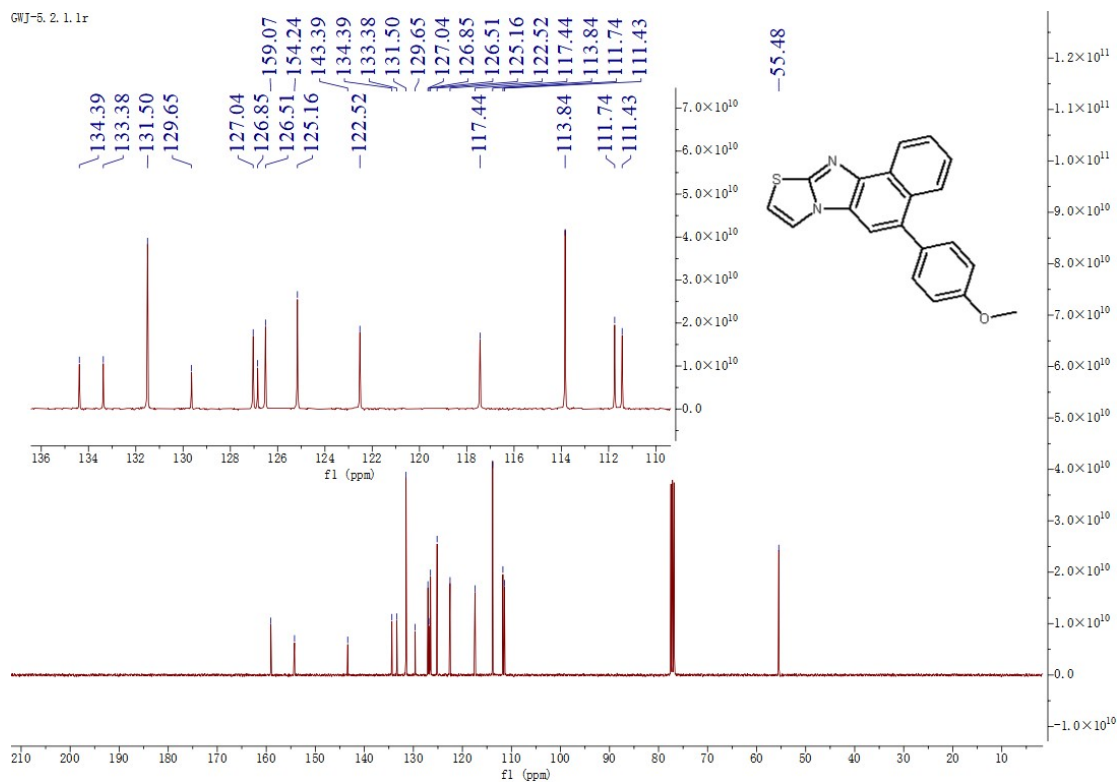

1,6,7-triphenylimidazo[5,1,2-cd]indolizine (**33**):

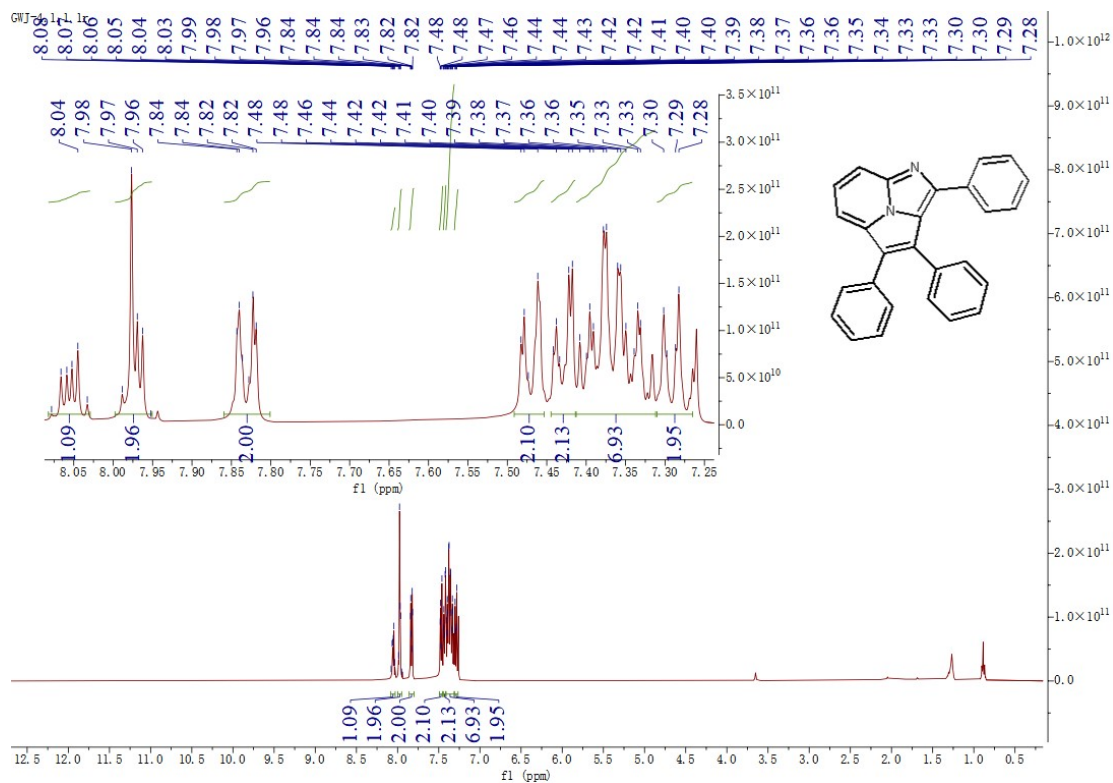

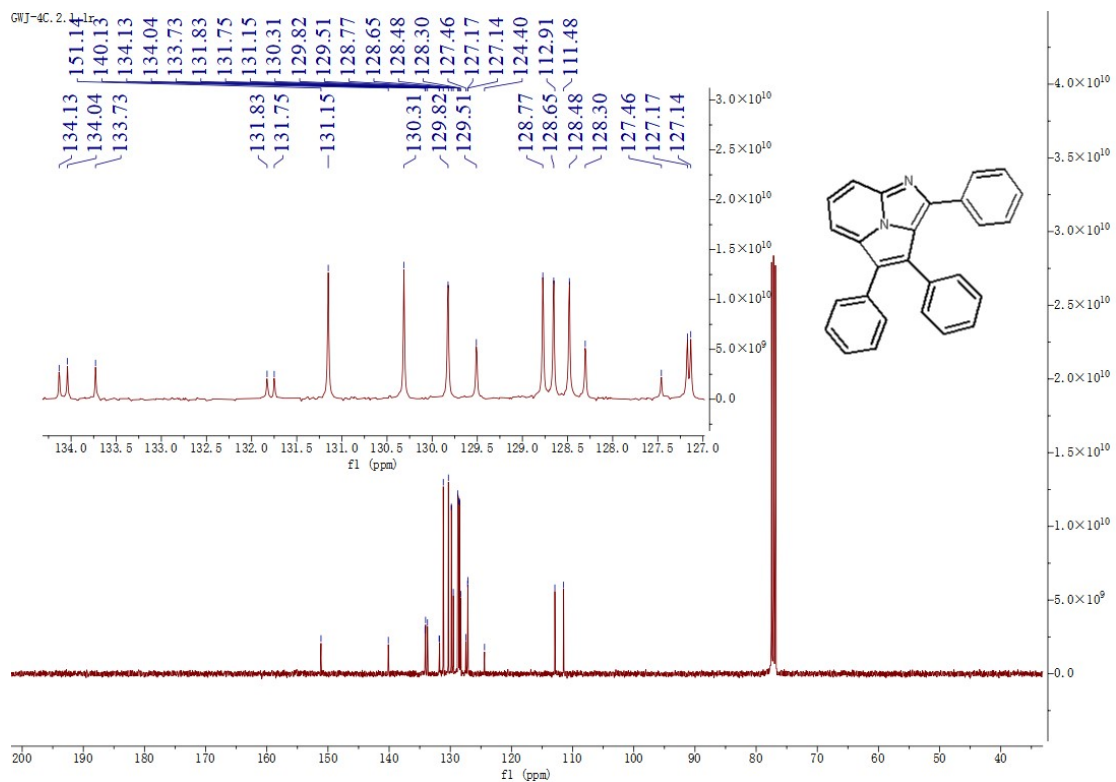

### 7-methyl-1,6-diphenylimidazo[5,1,2-cd]indolizine (34)

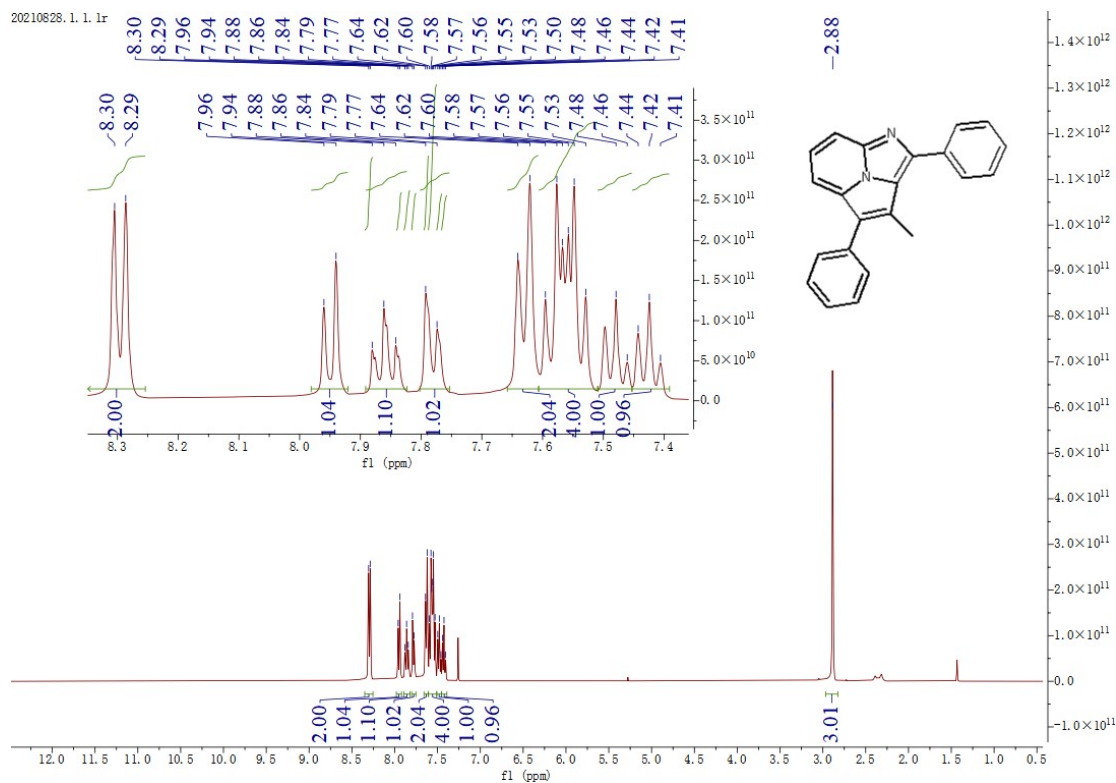





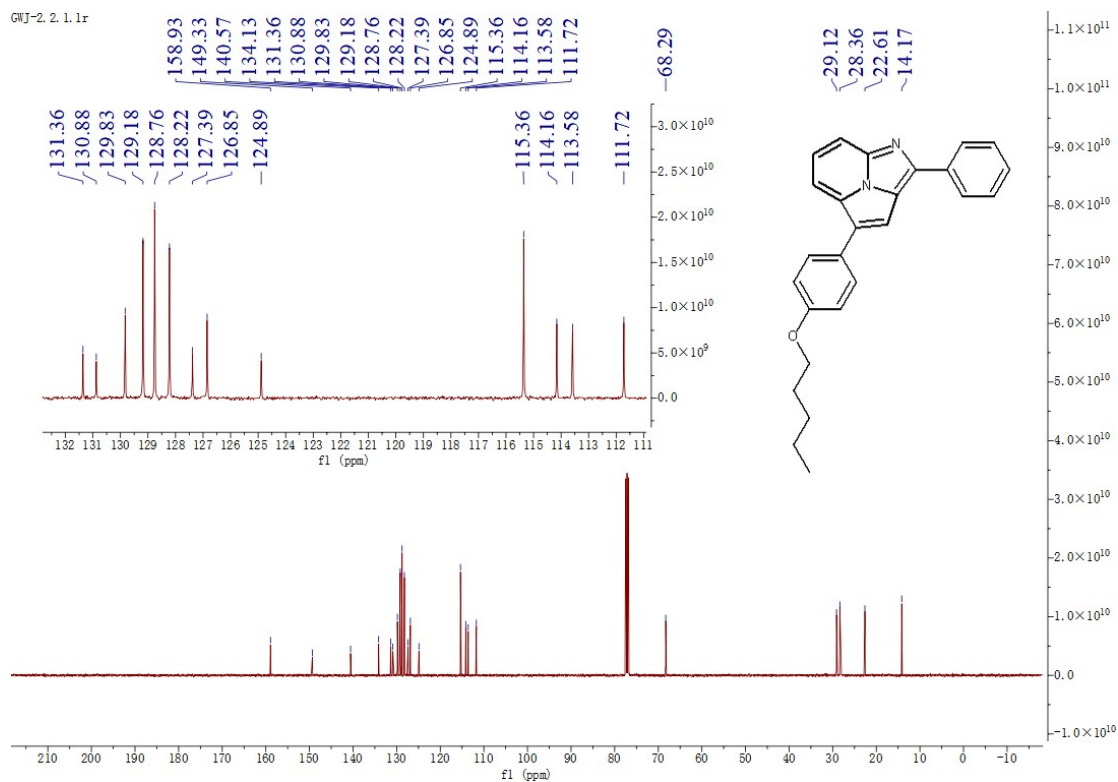

6-([1,1'-biphenyl]-4-yl)-1-phenylimidazo[5,1,2-*cd*]indolizine (36):

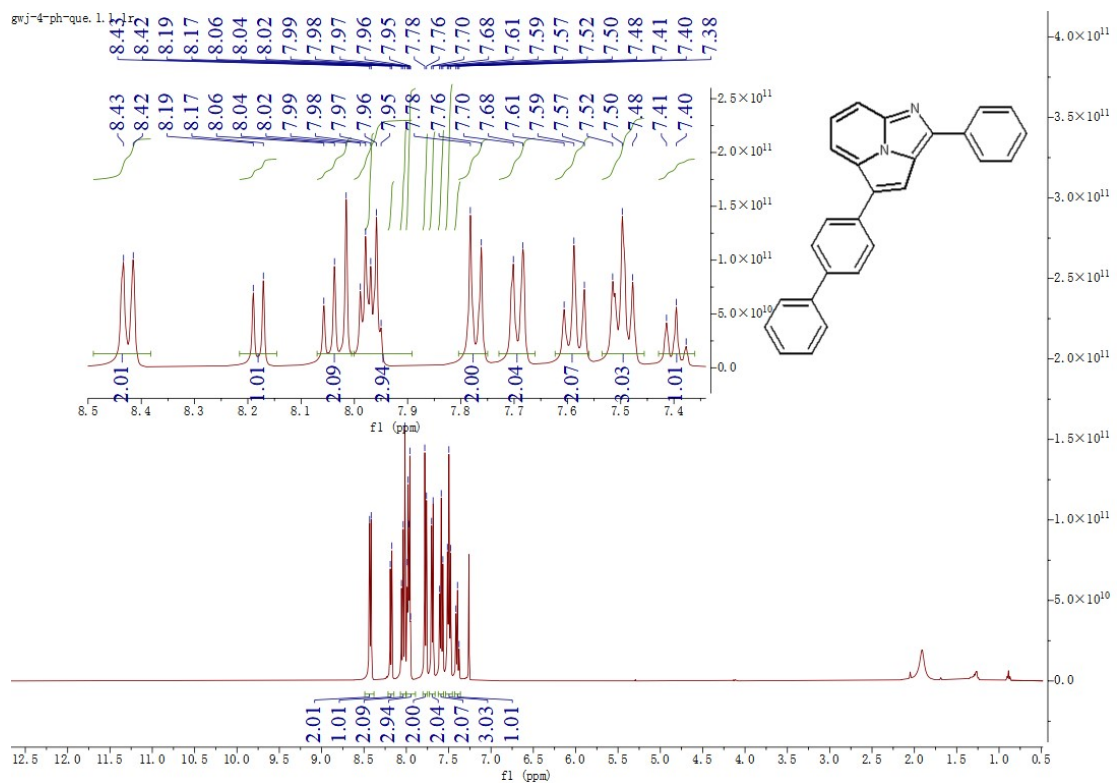

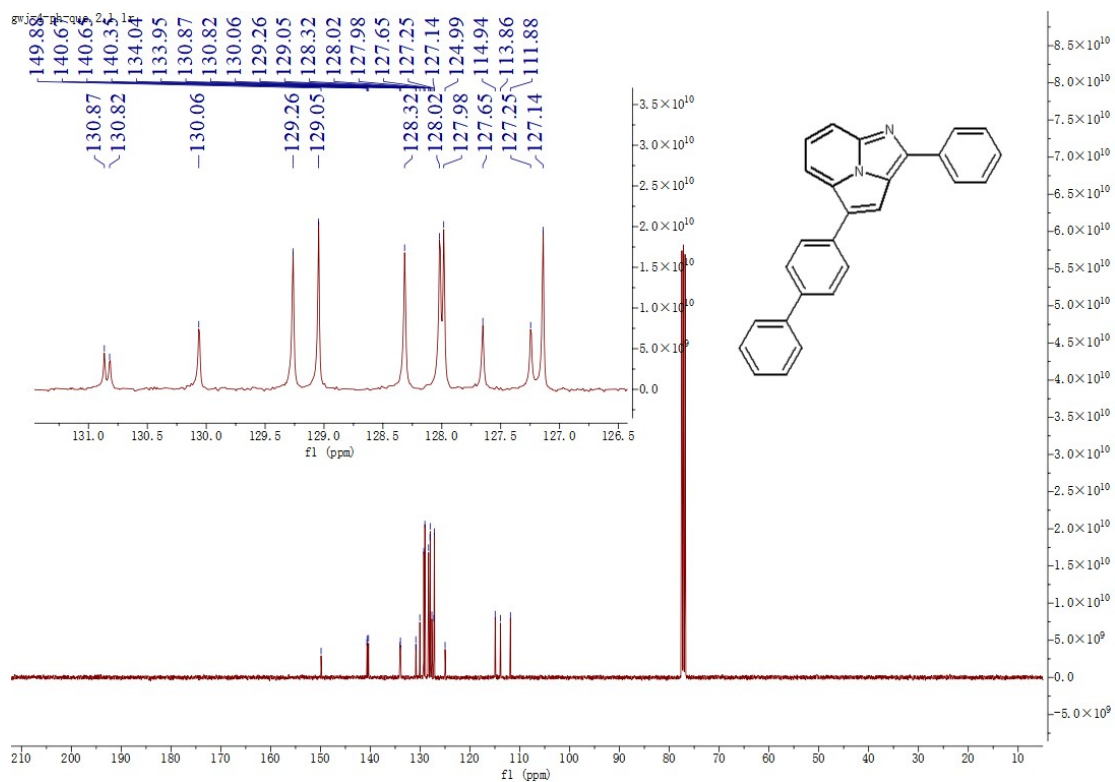

### 1-phenyl-6-(p-tolyl)imidazo[5,1,2-cd]indolizine (37):

01J-MZ-4CH3-QUE. 1. 1. 1r

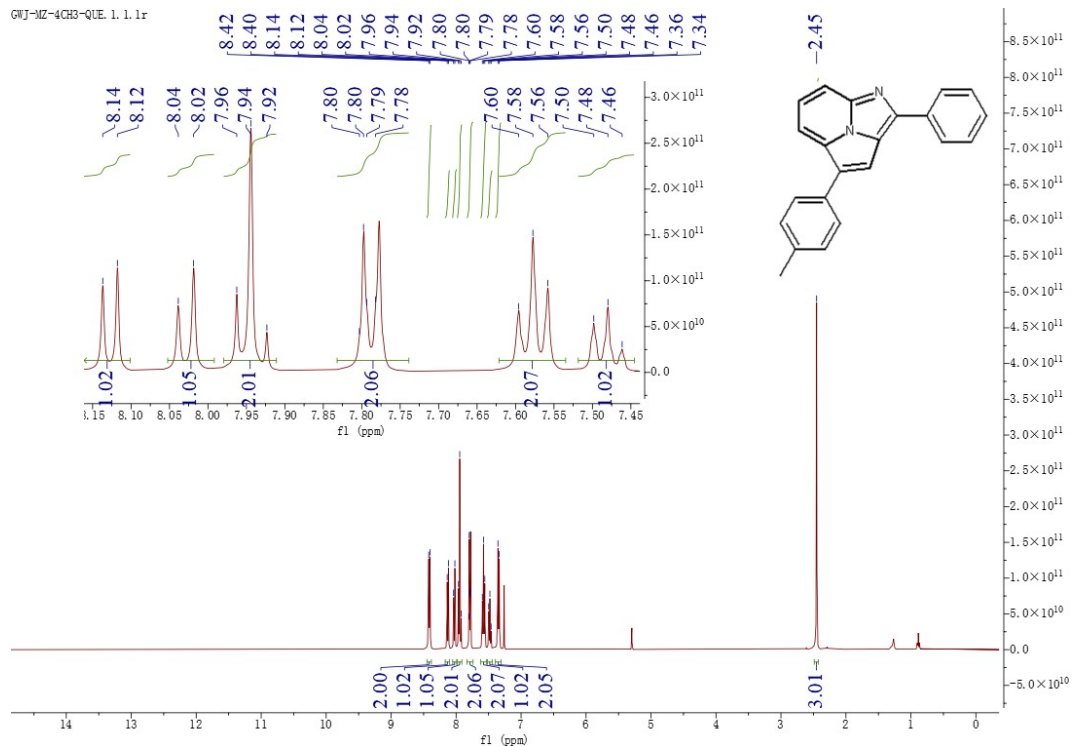

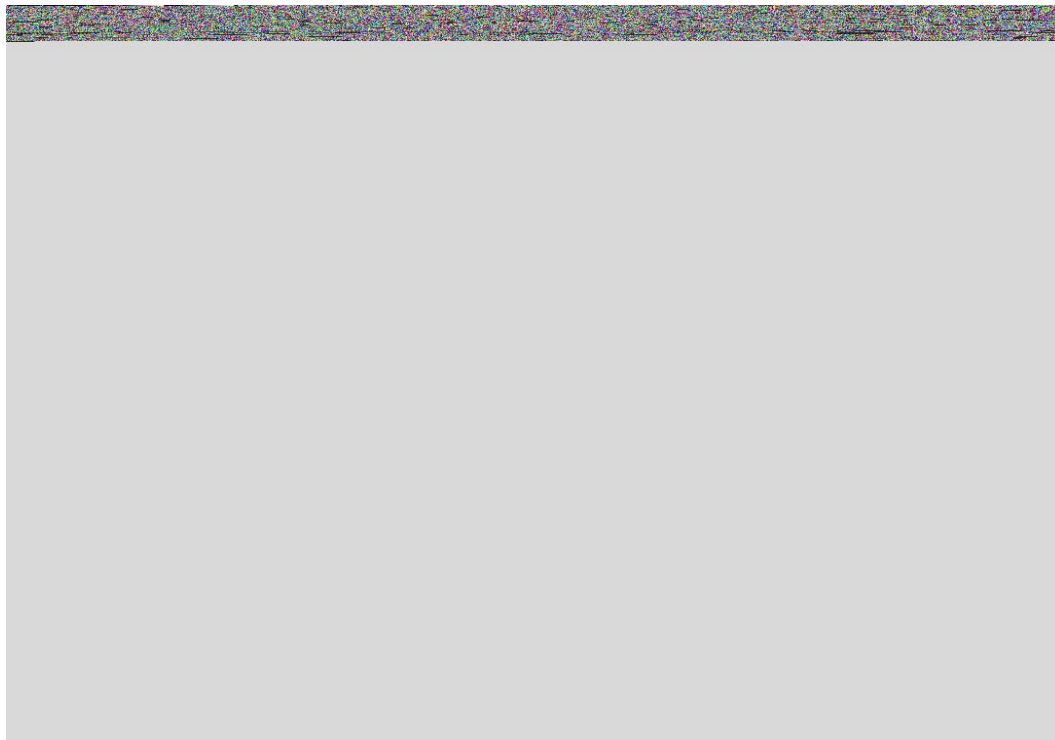

6-(4-(*tert*-butyl)phenyl)-1-phenylimidazo[5,1,2-*cd*]indolizine (**38**):

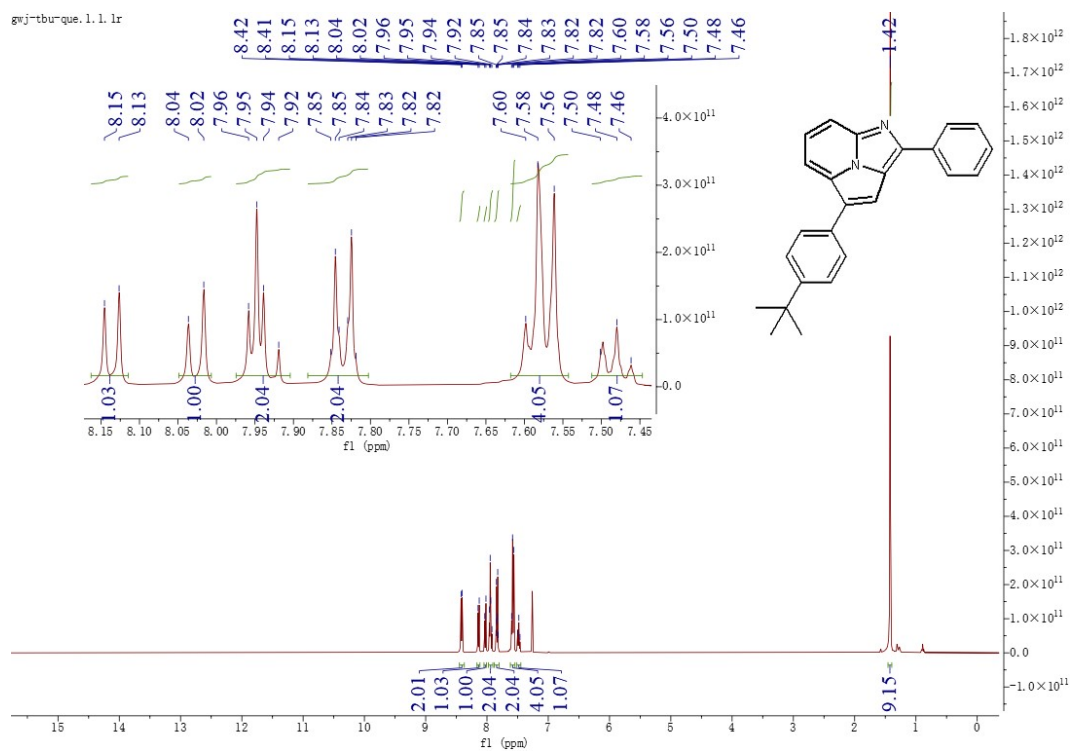

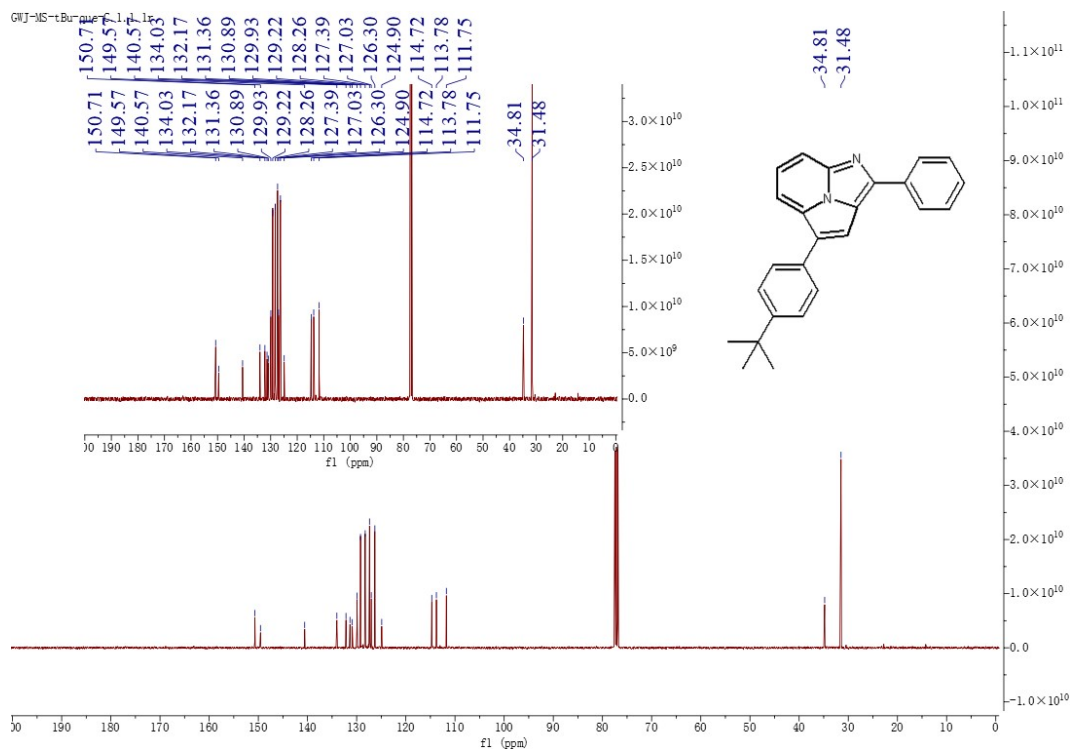

6-(2-methoxyphenyl)-1-phenylimidazo[5,1,2-cd]indolizine (39):

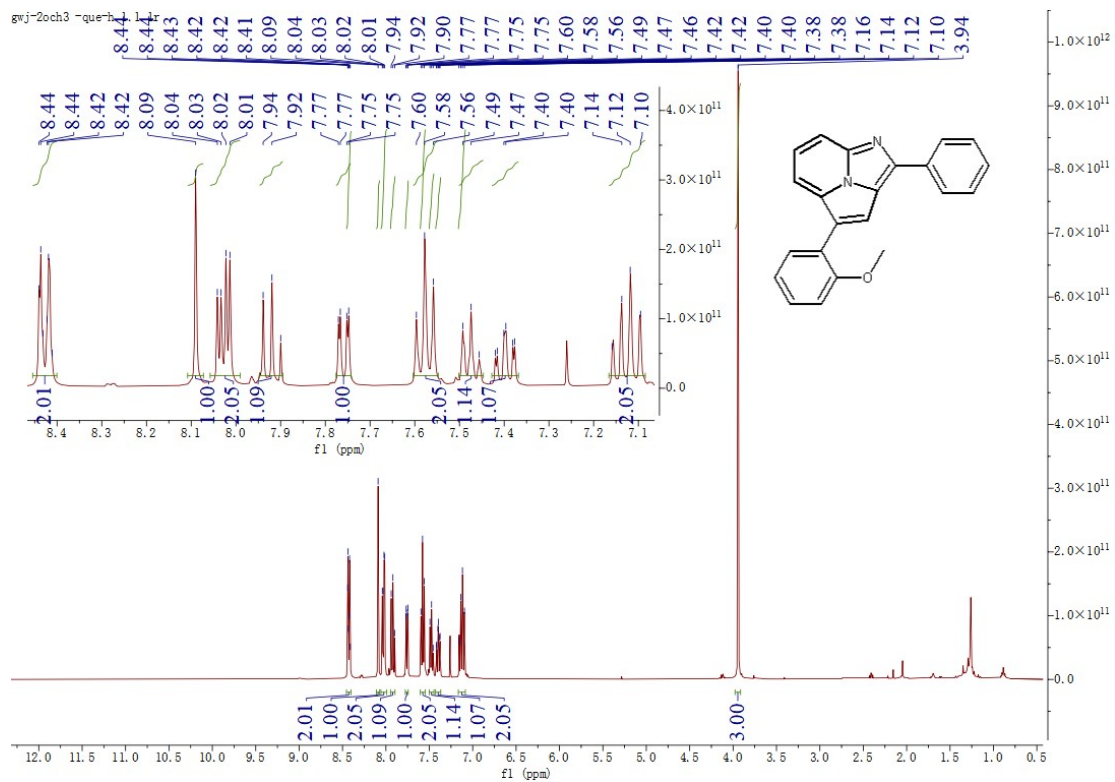



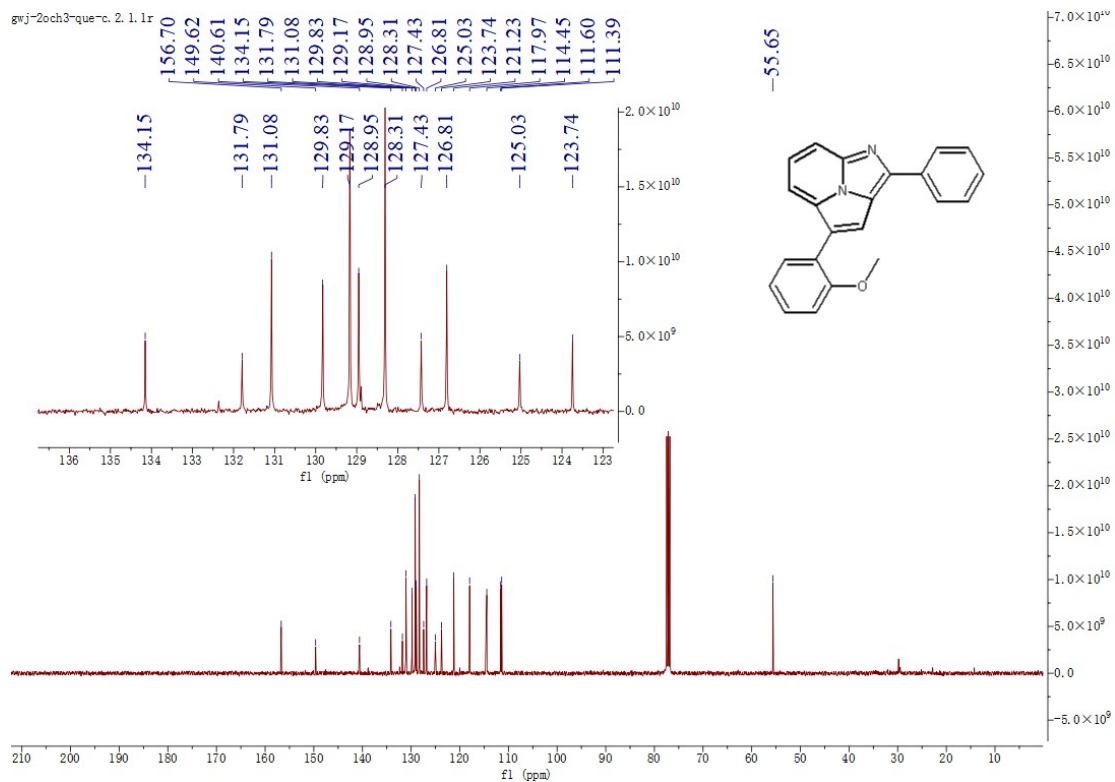

6-(3-methoxyphenyl)-1-phenylimidazo[5,1,2-cd]indolizine (**40**):

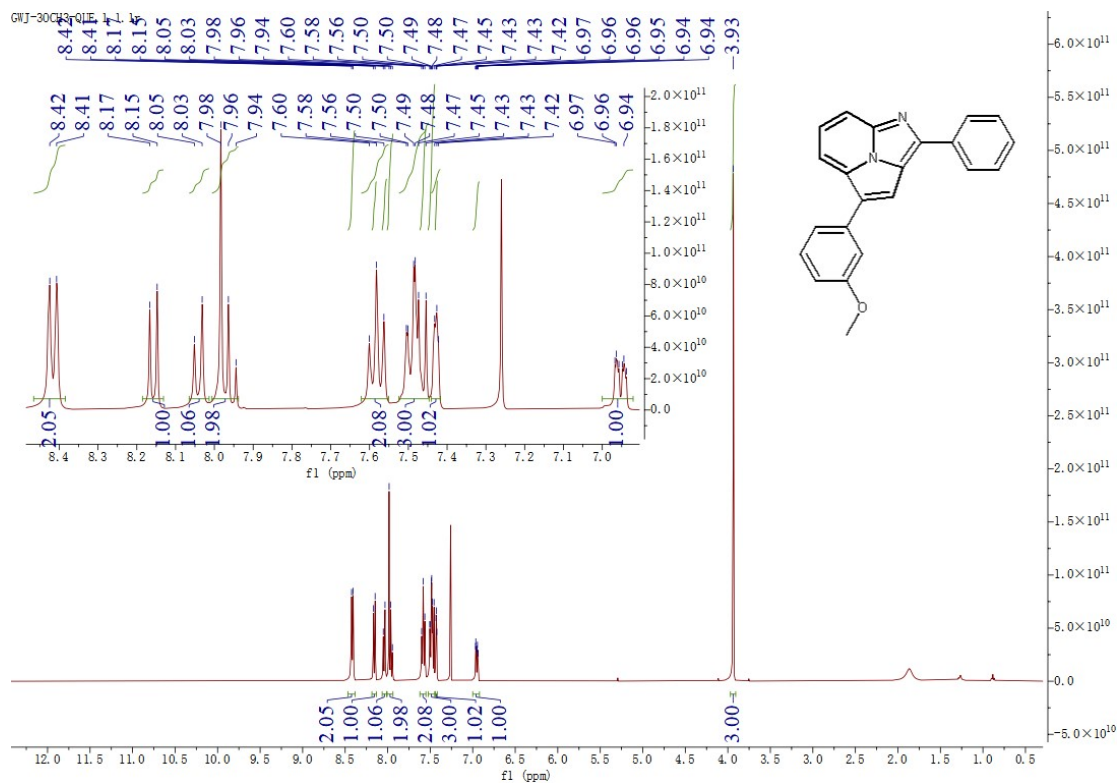

GWJ-30CH3-QUE. 2. 1. 1r

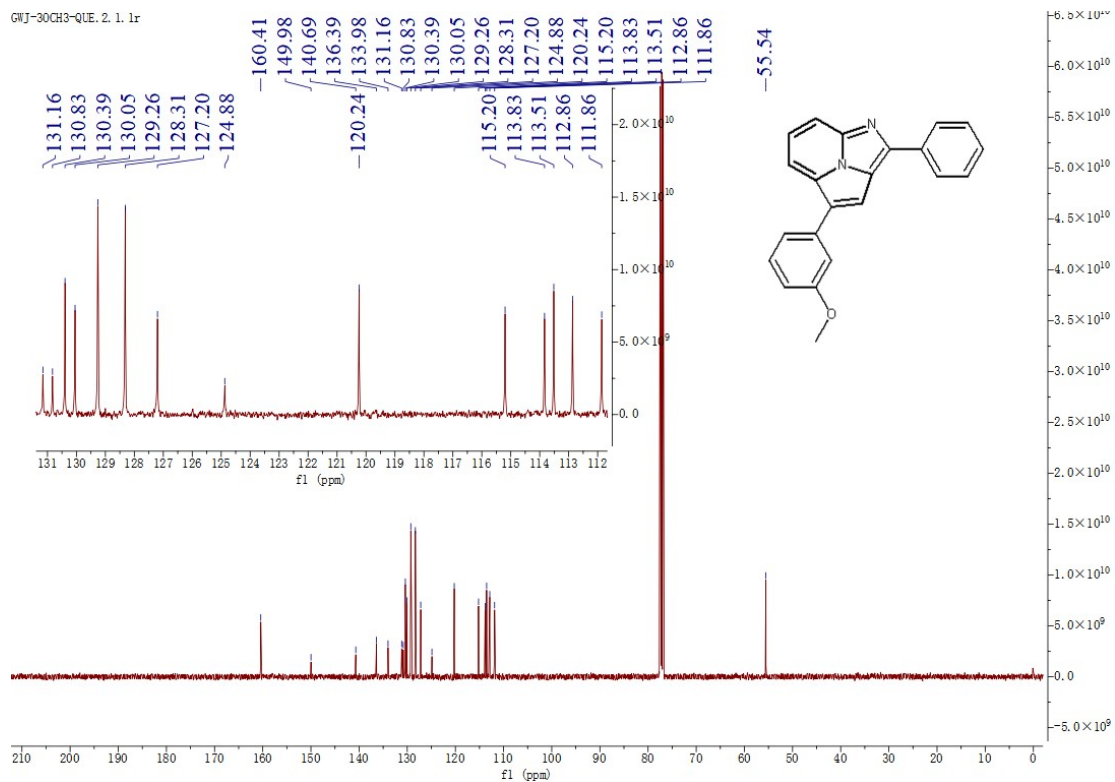

5-(4-(trifluoromethyl)phenyl)naphtho[1',2':4,5]imidazo[1,2-a]pyridine (41):

GWJ-4CF3-QUE. 1. 1r

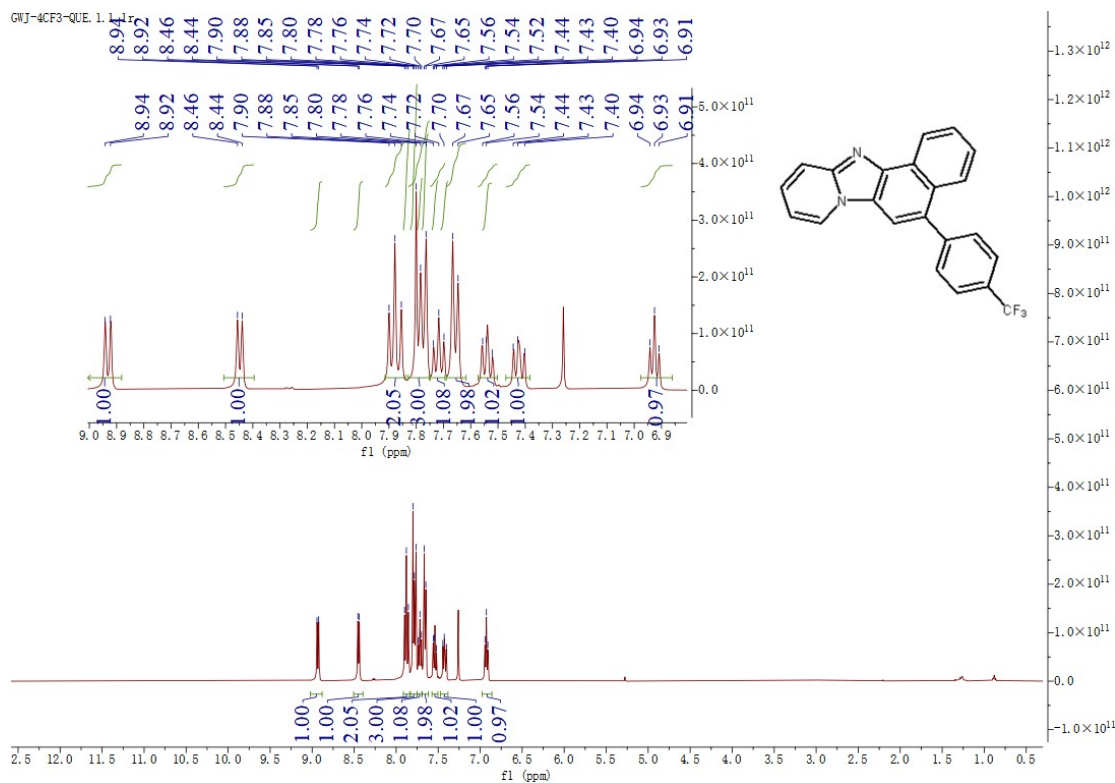



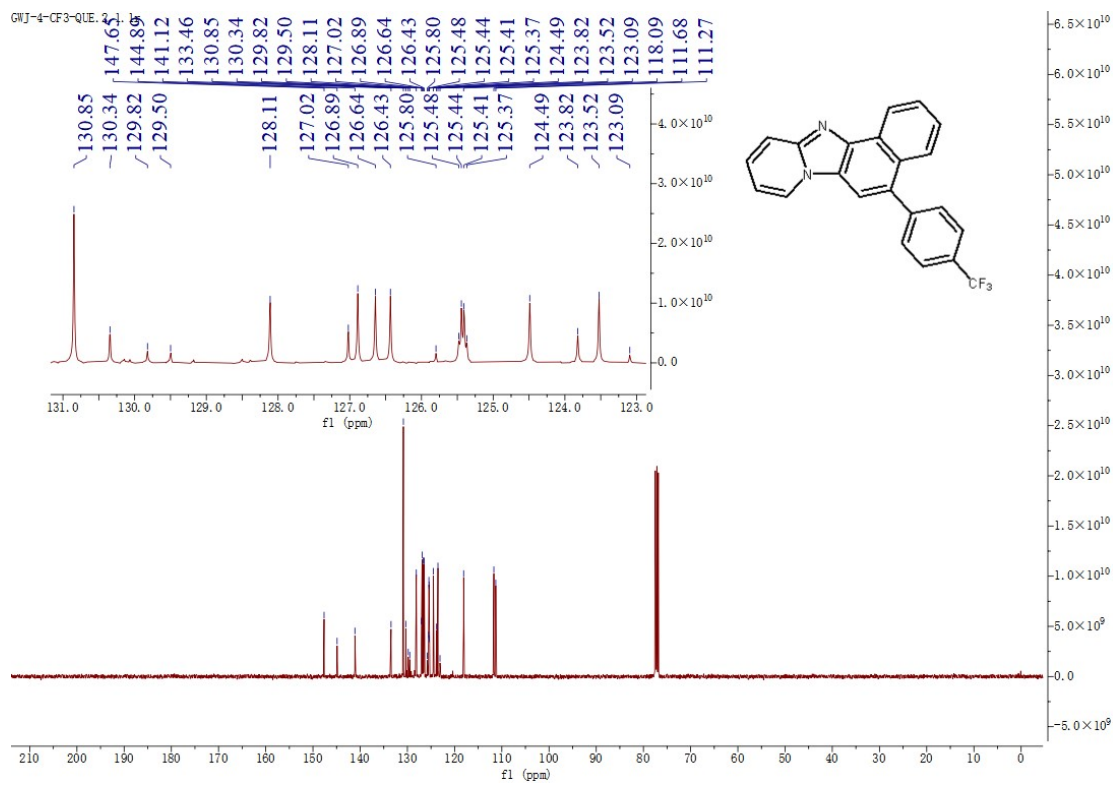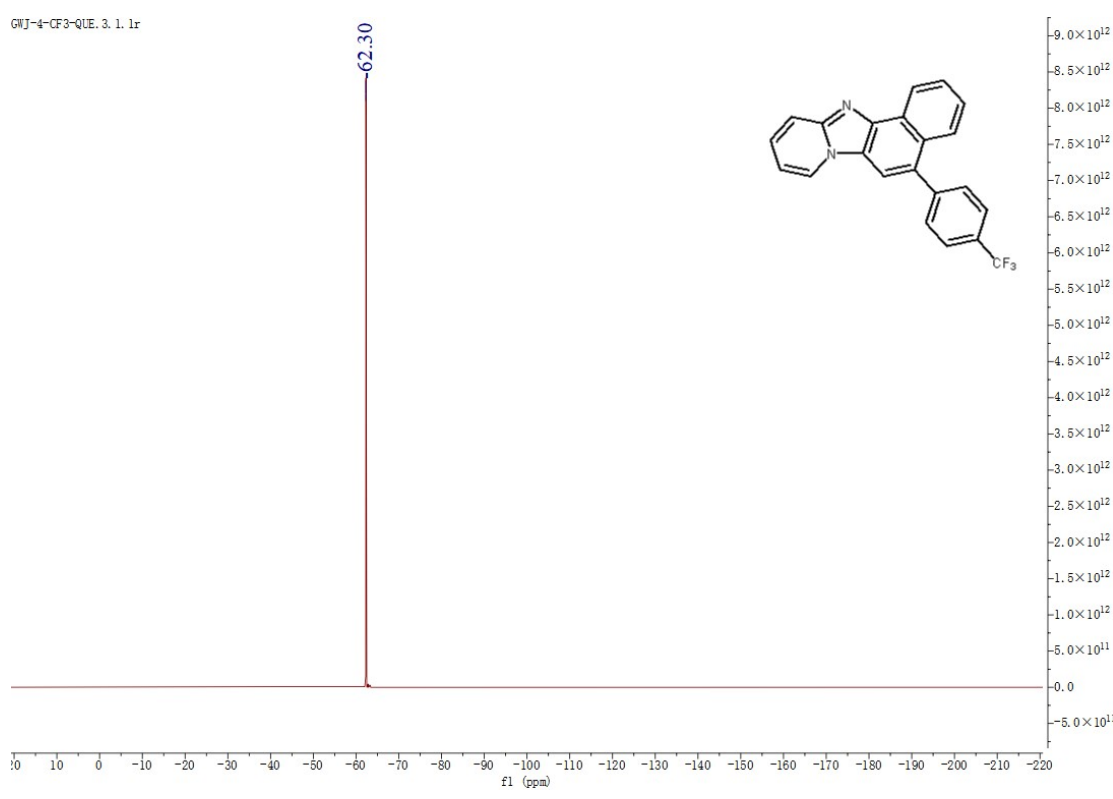



4-(naphtho[1',2':4,5]imidazo[1,2-a]pyridin-5-yl)benzonitrile (**43**):

GUJ-MZ-4CN-QUE. 1. 1. 1r

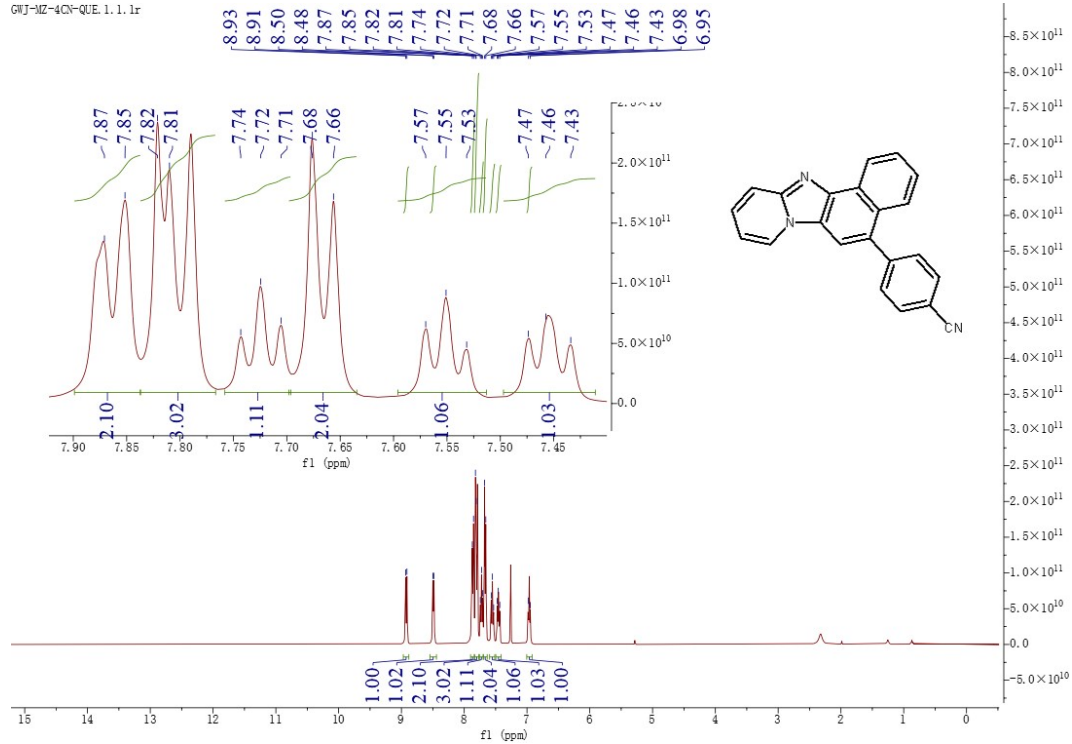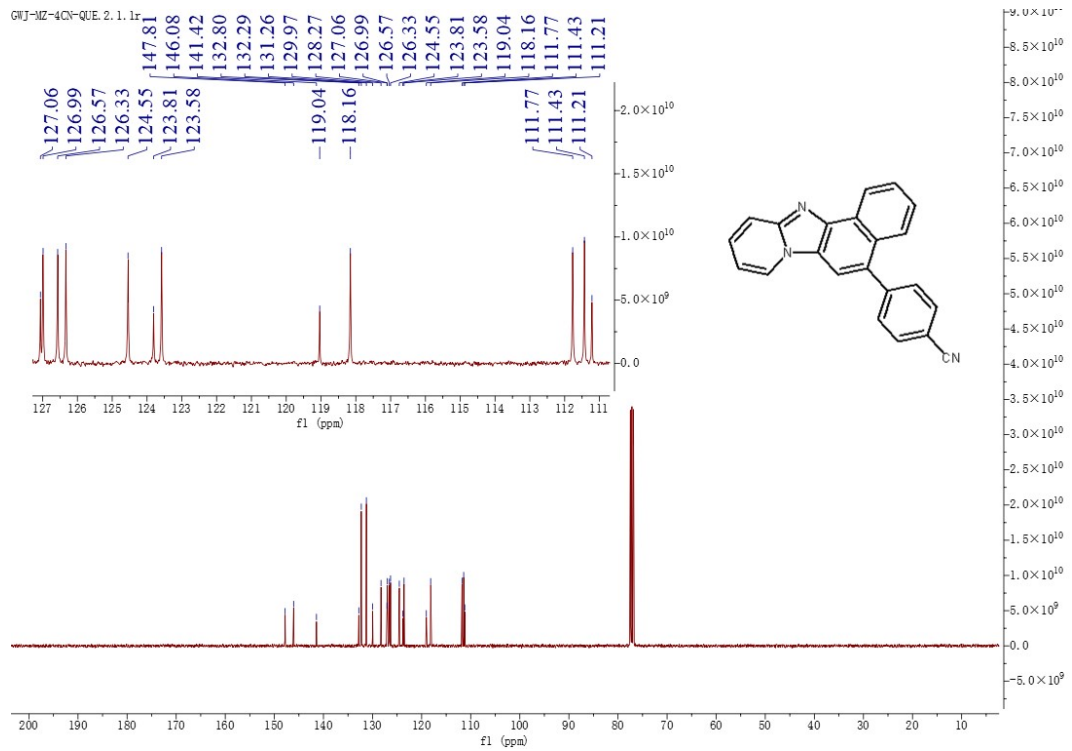

8-(4-methoxyphenyl)-7-phenylbenzo[4,5]imidazo[1,2-a]pyridine (**44**):

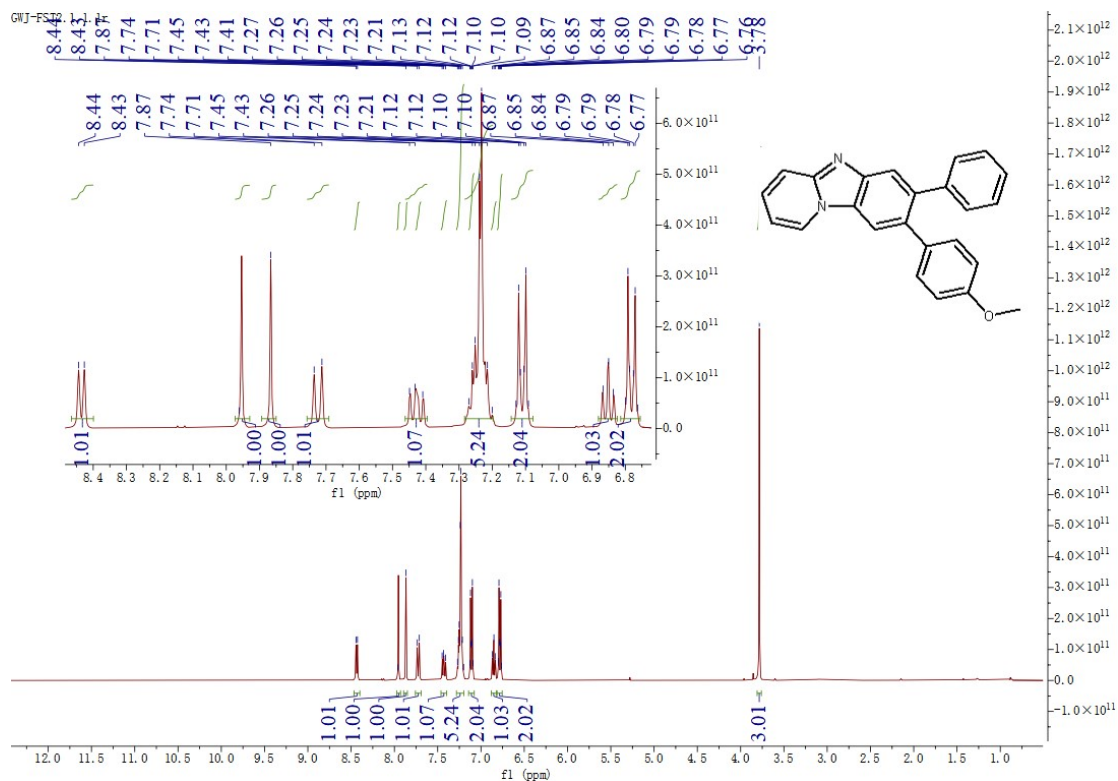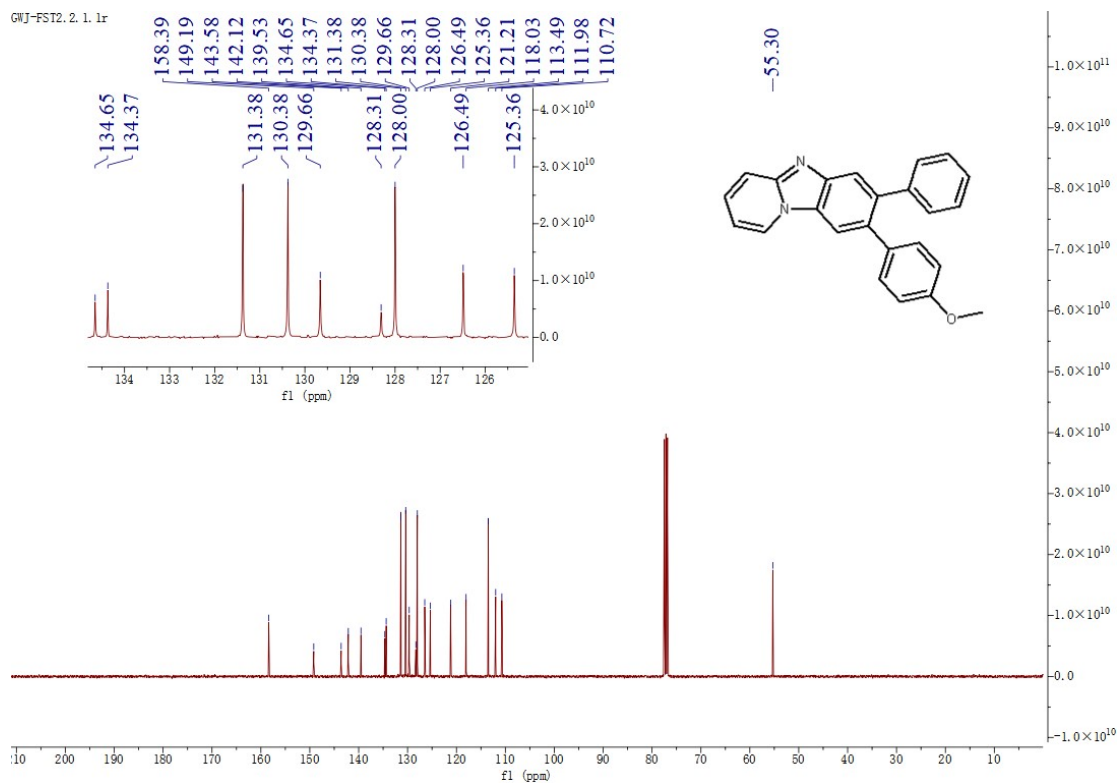

7-(4-chlorophenyl)-8-(4-methoxyphenyl)benzo[4,5]imidazo[1,2-a]pyridine (45):

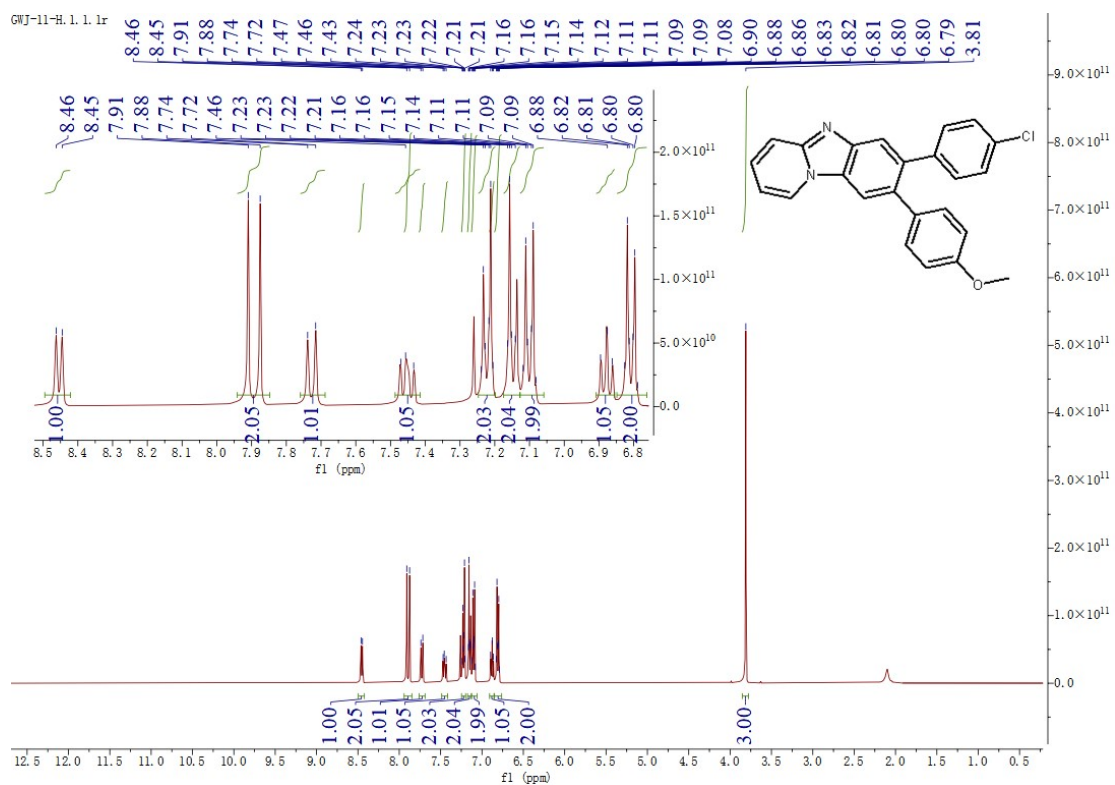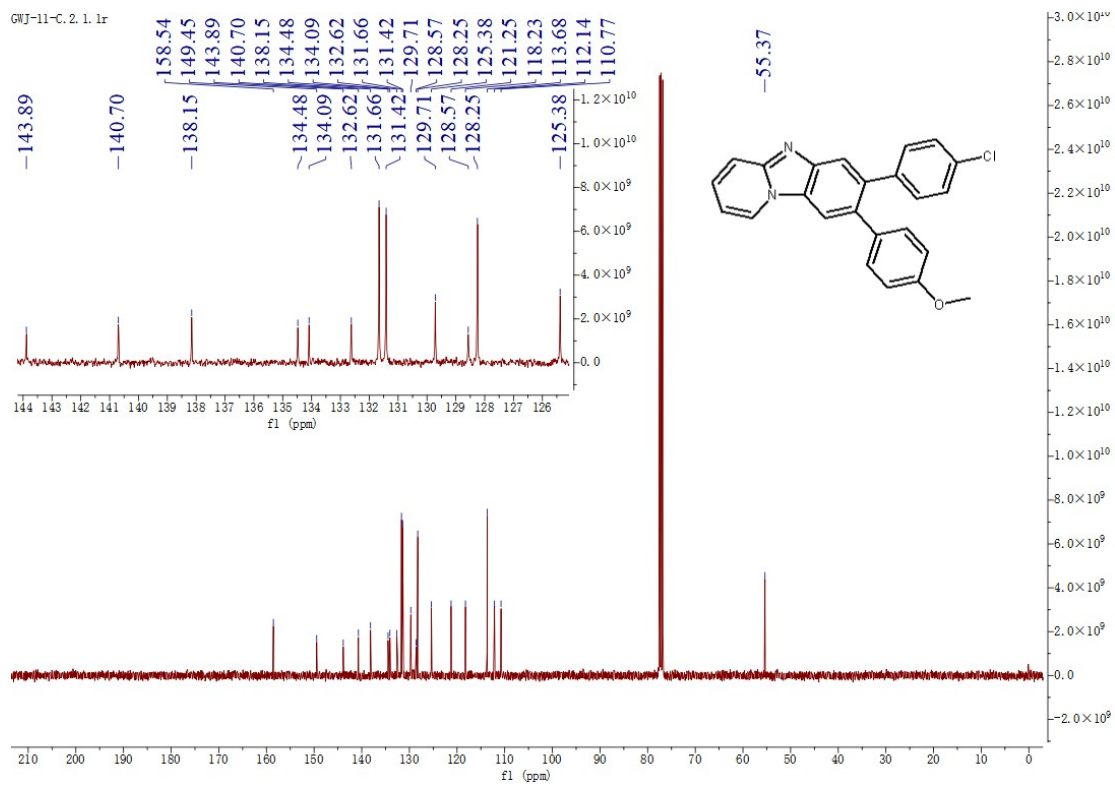



8-(4-methoxyphenyl)-7-(*p*-tolyl)benzo[4,5]imidazo[1,2-*a*]pyridine (**46**):

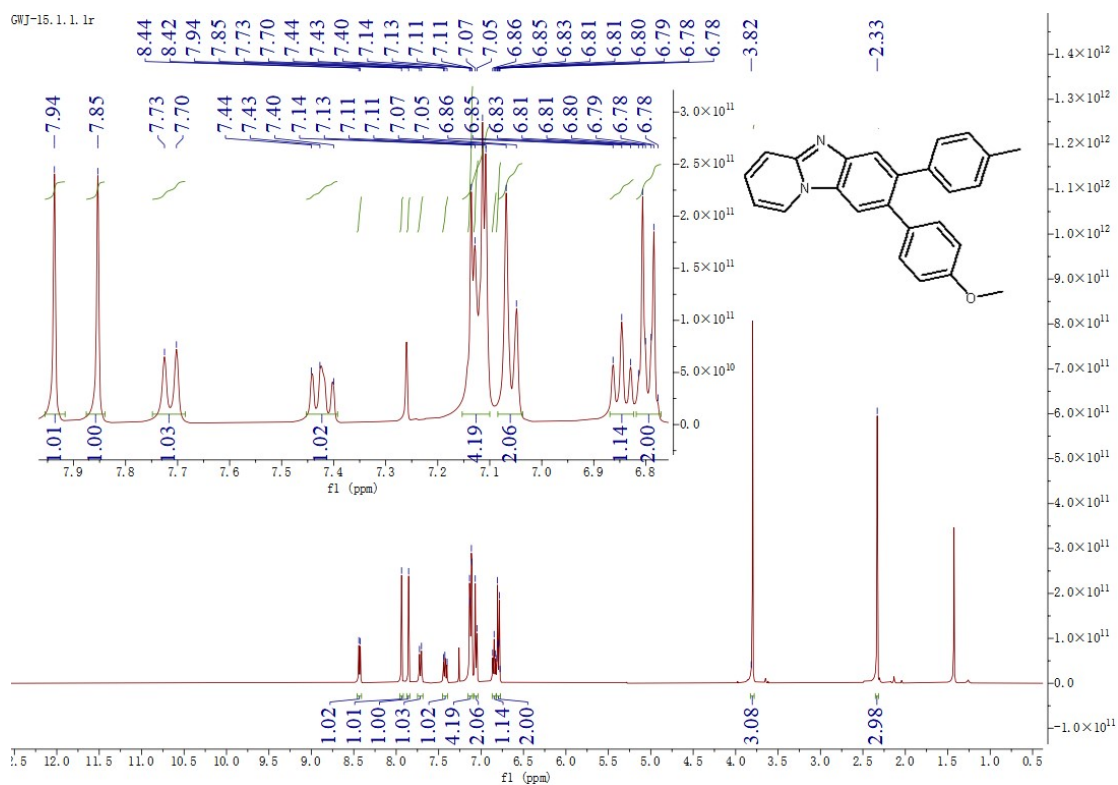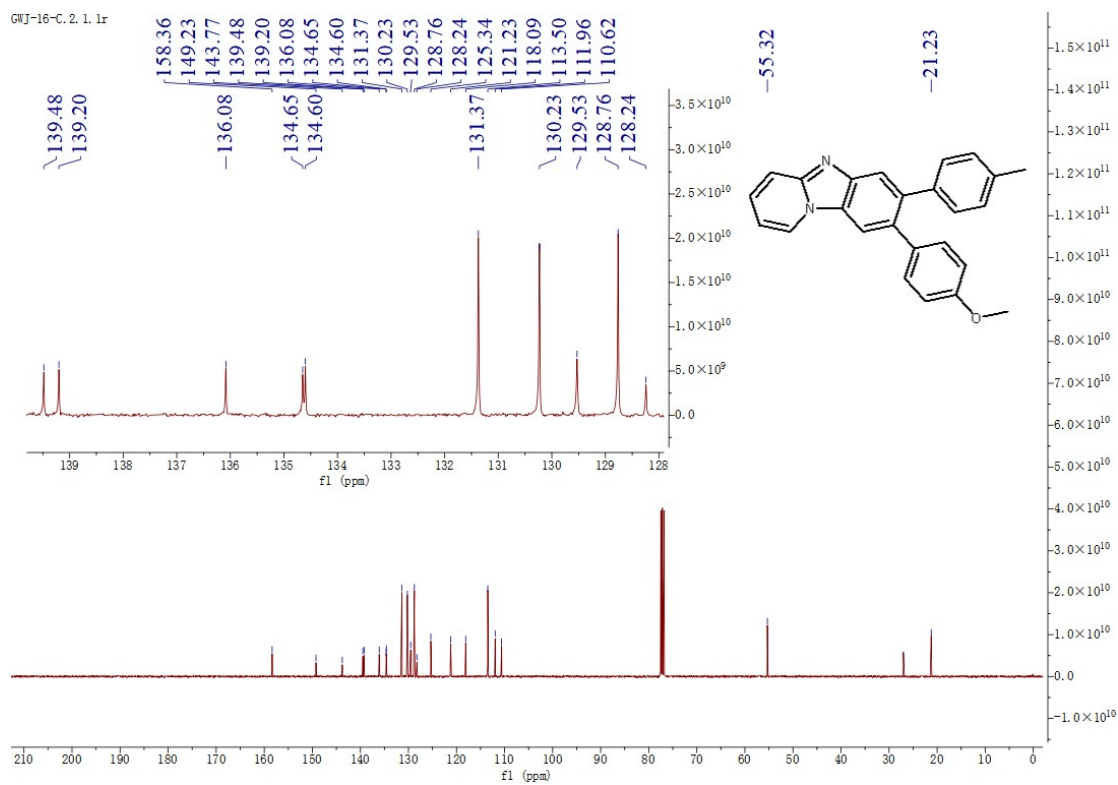

8-(4-methoxyphenyl)-7-(4-(trifluoromethyl)phenyl)benzo[4,5]imidazo[1,2-a]pyridine

(47):

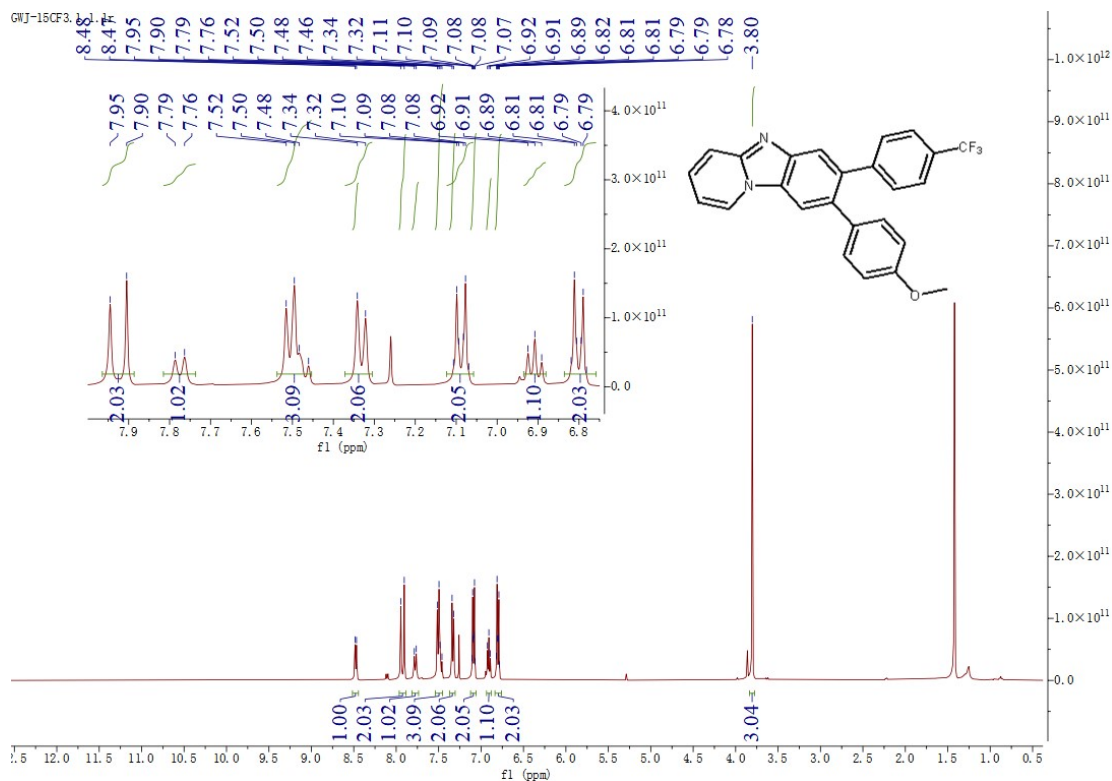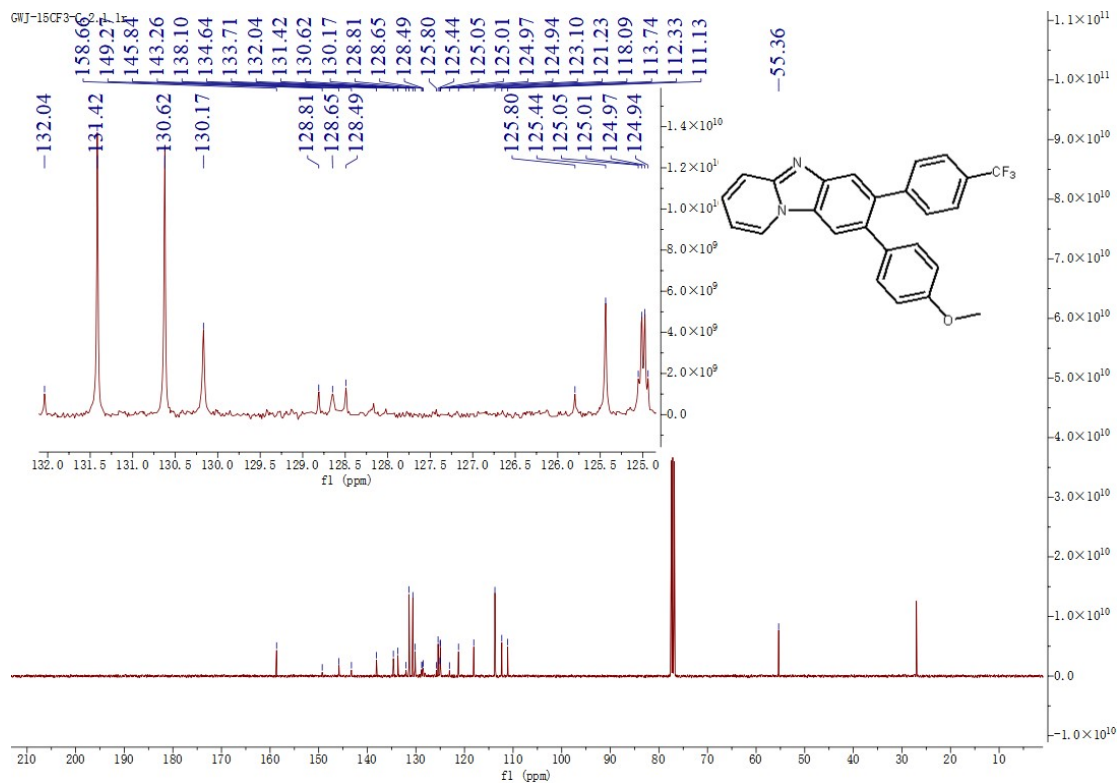



GWJ-CF3-3.2.1.1r

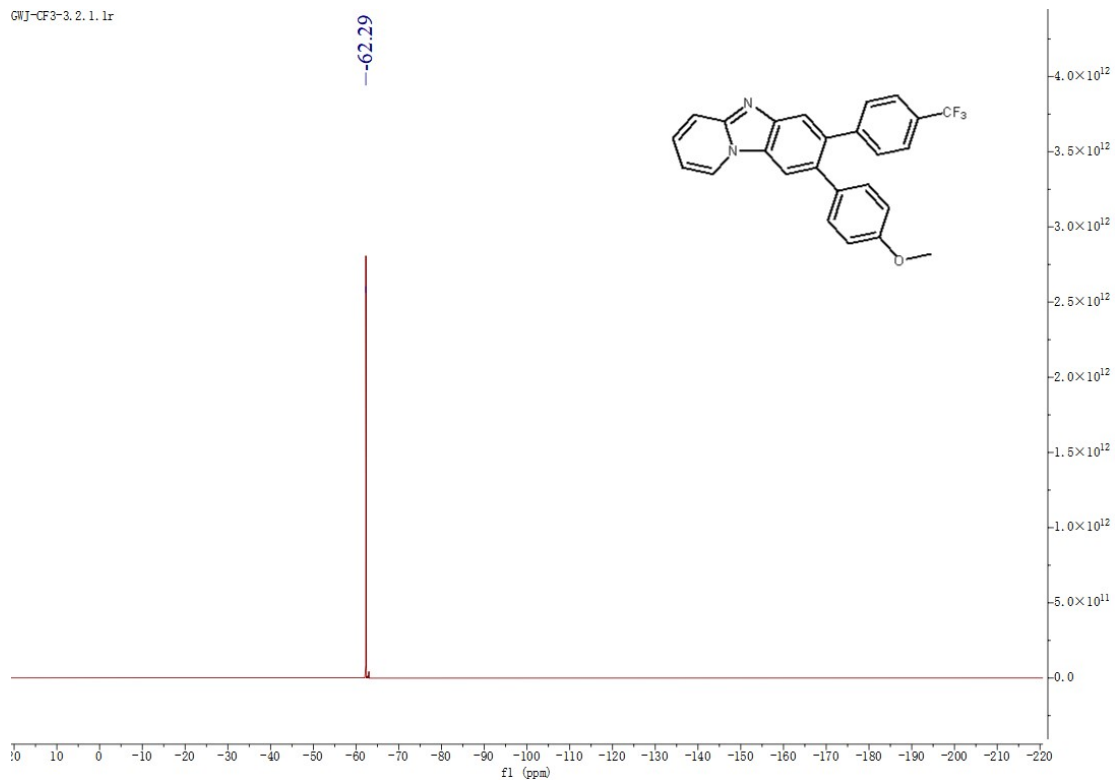

7-(2-bromo-5-chlorophenyl)-8-(4-methoxyphenyl)benzo[4,5]imidazo[1,2-a]pyridine

(48):

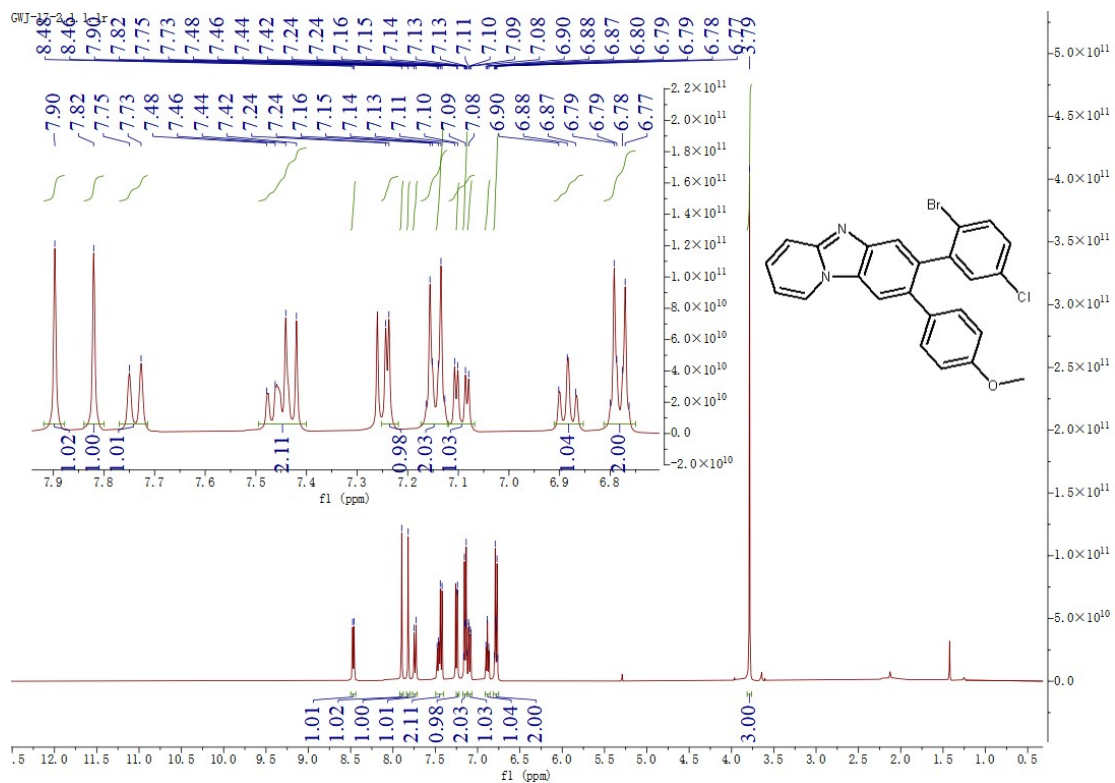

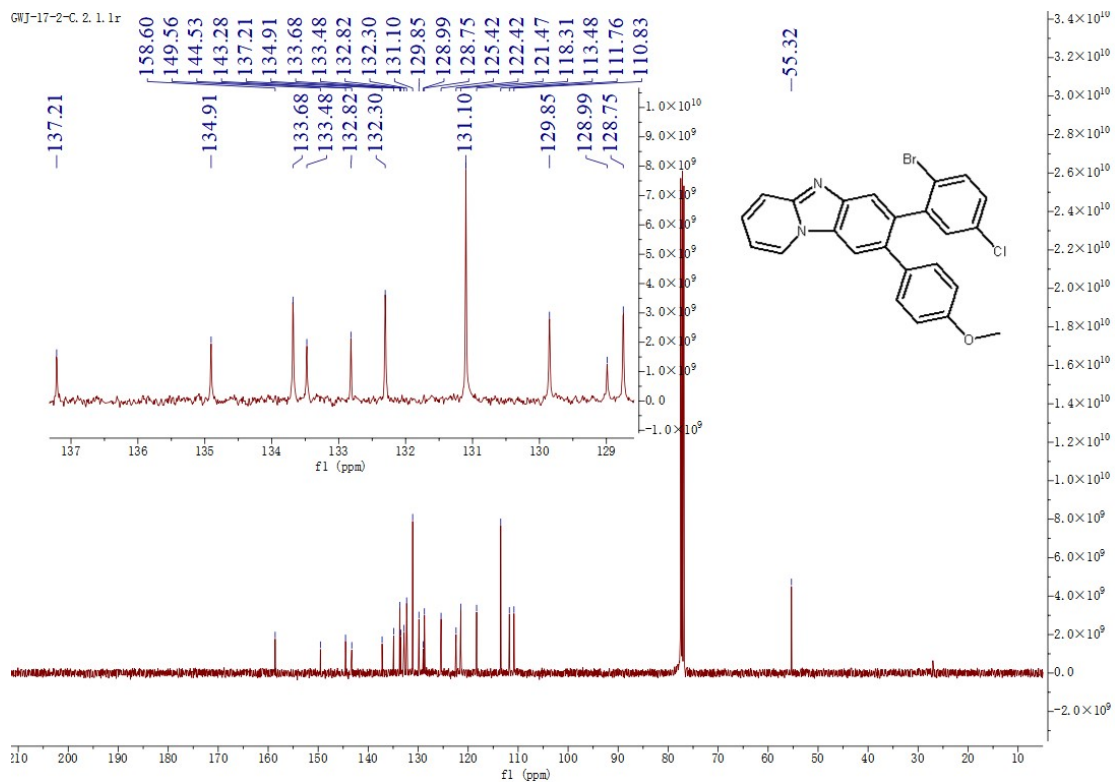

8-(4-methoxyphenyl)-7-(thiophen-2-yl)benzo[4,5]imidazo[1,2-a]pyridine (**49**):

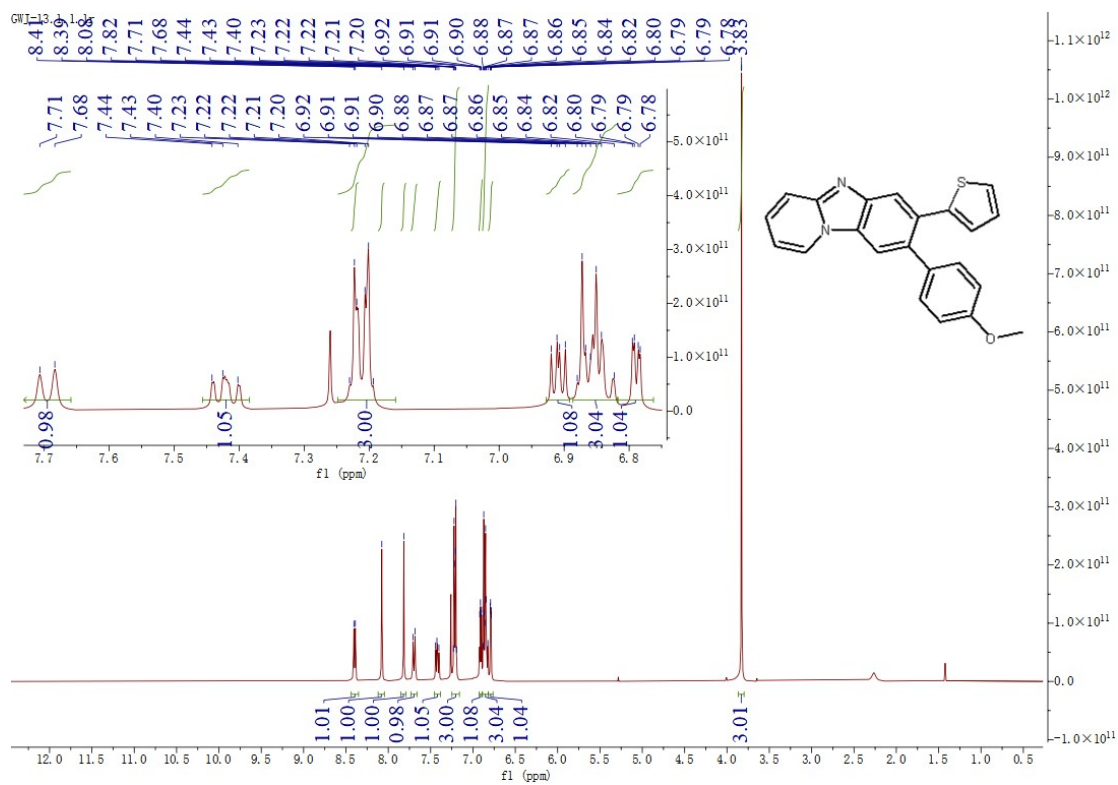

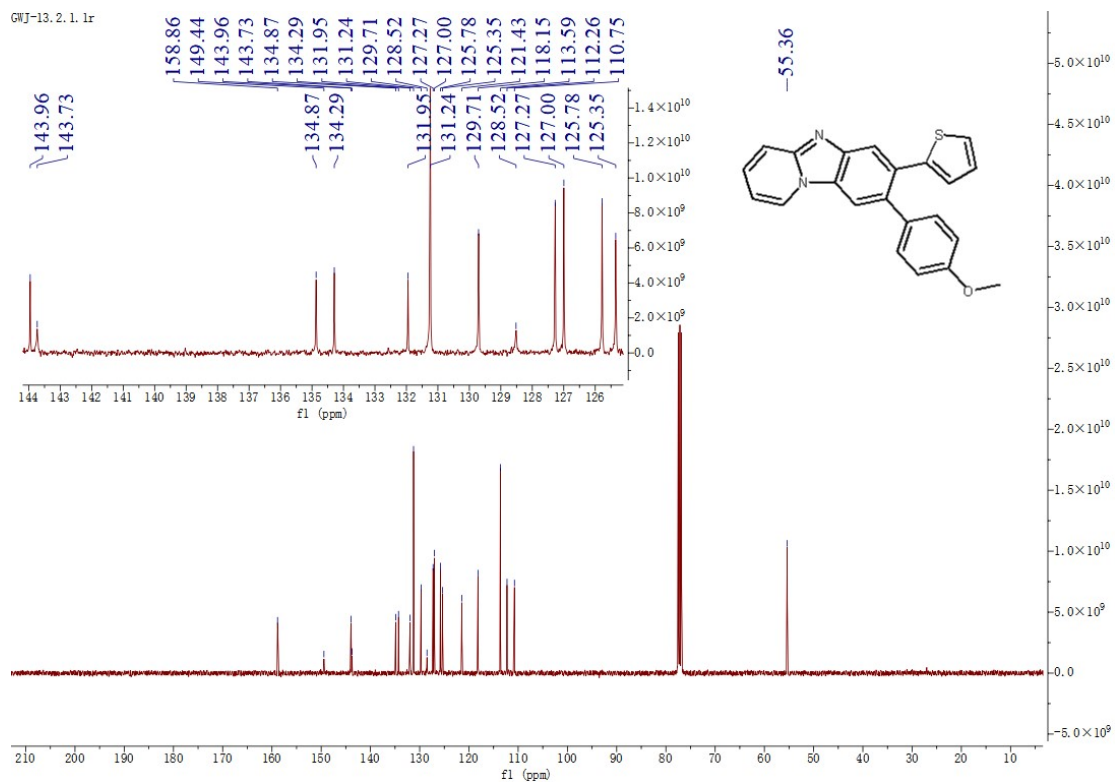

2,6-di-*tert*-butyl-4-((2-phenylimidazo[1,2-*a*]pyridin-3-yl)methylene)cyclohexa-2,5-dien-1-one (**50**):

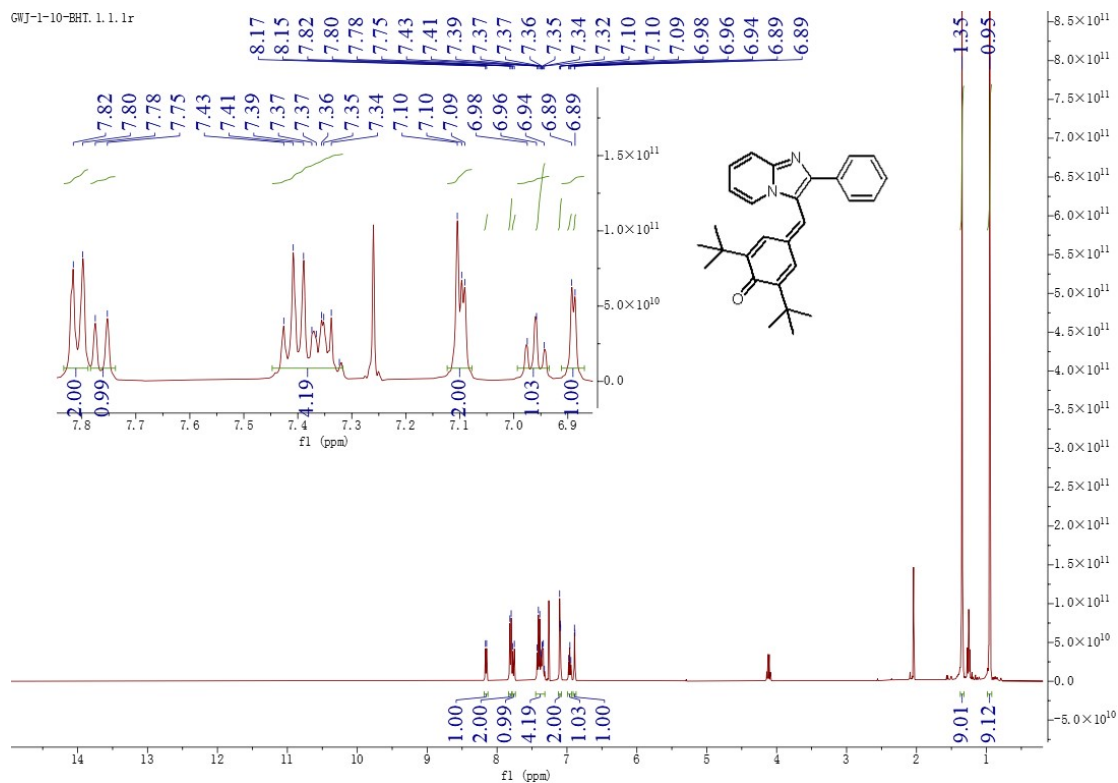

Supplement: d2gc01248k1.pdf [file d2gc01248k1.pdf]
